# Supplementary material for: One-pot synthesis of β-N-glycosyl imidazole analogues via a palladium-catalysed decarboxylative allylation
Source: Royal Society of Chemistry journal article supplement (doi:10.1039/c3cc48041k), 2014-01-01

## Supplementary data

### **One-pot synthesis of $\beta$ -*N*-glycosyl imidazole analogues *via* a palladium-catalysed decarboxylative allylation**

Shaohua Xiang, Jingxi He, Jimei Ma and Xue-Wei Liu\*

Division of Chemistry and Biological Chemistry, School of Physical and  
Mathematical Sciences,

Nanyang Technological University, Singapore 637371

E-mail: xuewei@ntu.edu.sg

| <b>Content</b>                                                               | <b>Page</b>  |
|------------------------------------------------------------------------------|--------------|
| <b>General experimental details</b>                                          | <b>1</b>     |
| <b>Procedure for preparing compound 3a</b>                                   | <b>2</b>     |
| <b>General procedure for preparing <i>N</i>-glycosyl imidazole analogues</b> | <b>3</b>     |
| <b>Characterization of the <i>N</i>-glycosyl imidazole analogues</b>         | <b>4-17</b>  |
| <b>Reference</b>                                                             | <b>18</b>    |
| <b><sup>1</sup>H NMR Spectra of 4b-4d with or without palladium catalyst</b> | <b>19-21</b> |
| <b>Spectral data of 4a-4v and 6 with palladium catalyst</b>                  | <b>22-44</b> |
| <b>Reaction progress of compound 1a as monitored by <sup>1</sup>H NMR</b>    | <b>45</b>    |
| <b>X-ray data for compound 4a</b>                                            | <b>46</b>    |
| <b>Furanosyl glycal and <i>N</i>-glycoside</b>                               | <b>47-48</b> |

## General experimental details

All reactions were performed under a nitrogen atmosphere. Unless specified, all reagents and starting materials were purchased from commercial sources and used as received. Solvents were purified following standard literature procedures. Analytical thin layer chromatography (TLC) was performed using Merck TLC silica gel 60 F254 plate. Visualization was achieved by UV light (254 nm). Flash chromatography was performed using silica gel 60 (0.010-0.063 mm) and a gradient solvent system (EtOAc/hexane as eluent). Melting points were obtained in open capillary tubes in Omega MPA 100 melting point apparatus. Optical rotations were measured in  $\text{CHCl}_3$  and  $\text{CH}_2\text{Cl}_2$  on a Schmidt + Haensch polarimeter with a 1 cm cell ( $c$  given in g/100 ml).  $^1\text{H}$  and  $^{13}\text{C}$  NMR spectra were measured on 400 MHz Bruker AVIII 400 spectrometer. Chemical shifts (ppm) were recorded with tetramethylsilane (TMS) as the internal reference standard. Multiplicities are given as: s (singlet), br s (broad singlet), d (doublet), t (triplet), dd (doublet of doublets) or m (multiplet or unsolved). The number of protons ( $n$ ) for a given resonance is indicated by  $n\text{H}$  and coupling constants are reported as a  $J$  value in Hz. Infrared spectra were recorded on a FTIR Restige-21 (Shimadzu) spectrometer. Solid samples were examined as a thin film between NaCl salt plates. Low resolution mass spectra were determined on a Finnigan LCQ mass spectrometer and reported in units of mass to charge ( $m/z$ ). High resolution mass spectra (HRMS) were recorded on Waters Q-ToF premier<sup>TM</sup> mass spectrometer. X-ray crystallographic data was collected by using a Bruker X8Apex diffractometer with Mo  $K/\alpha$  radiation (graphite monochromator).

## Procedure for the preparing compound 3a

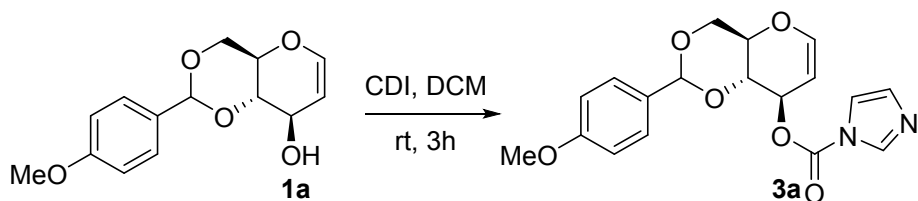

To a solution of CDI (1.5 equiv) in DCM (0.1 M) was added a solution of 4,6-*para*-methoxybenzylidene glucal **1a** (1.0 equiv) in DCM dropwisely at 0 °C. Then the mixture was allowed to warm to room temperature and stirred for 3 h. After that, the mixture was washed with H<sub>2</sub>O, brine, and then dried over Na<sub>2</sub>SO<sub>4</sub>, filtered and concentrated under reduced pressure. The residue was purified by column chromatography on silica gel (eluted with n-hexane/EA=1:1) to provide the desired carbamate compound **3a**.

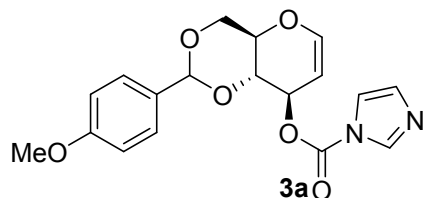

Compound **3a** was obtained in 94% yield as a white solid. M.p. 127-129 °C;  $[\alpha]_D^{23} -150$  ( $c$  1.0, CHCl<sub>3</sub>); IR (neat)  $\nu$ : 3016, 1759, 1641, 1614, 1518, 1392, 1236, 1094 cm<sup>-1</sup>; <sup>1</sup>H NMR (400 MHz, CDCl<sub>3</sub>):  $\delta$  8.14 (s, 1H), 7.37-7.45 (m, 3H), 7.06 (s, 1H), 6.86-6.92 (m, 2H), 6.49 (dd,  $J_1 = 6.1$  Hz,  $J_2 = 1.2$  Hz, 1H), 5.76 (dt,  $J_1 = 7.7$  Hz,  $J_2 = 1.8$  Hz, 1H), 5.59 (s, 1H), 4.92 (dd,  $J_1 = 6.1$  Hz,  $J_2 = 2.1$  Hz, 1H), 4.41 (dd,  $J_1 = 10.6$  Hz,  $J_2 = 5.1$  Hz, 1H), 4.18 (dd,  $J_1 = 10.4$  Hz,  $J_2 = 7.7$  Hz, 1H), 4.06 (td,  $J_1 = 10.2$  Hz,  $J_2 = 5.1$  Hz, 1H), 3.89 (t,  $J = 10.4$  Hz, 1H), 3.79 (s, 3H); <sup>13</sup>C NMR (100 MHz, CDCl<sub>3</sub>):  $\delta$  160.3, 148.3, 146.7, 137.1, 130.6, 128.9, 127.5, 117.1, 113.7, 101.7, 99.1, 76.4, 73.0, 68.8, 68.0, 55.3; HRMS (ESI) calcd. for C<sub>17</sub>H<sub>21</sub>O<sub>7</sub> [M+H]<sup>+</sup>: 359.1243, found: 359.1238.

## General procedure for the preparing *N*-glycosyl imidazole analogues from the glycols **1**

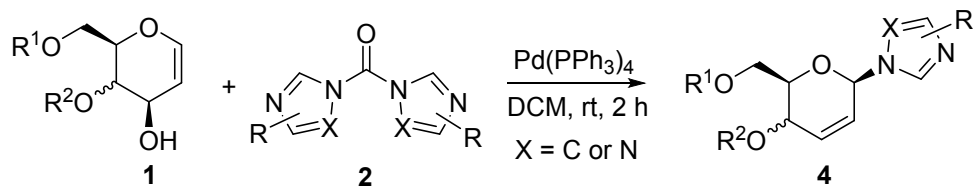

To a solution of CDI analogues (0.3 mmol) and Pd(PPh<sub>3</sub>)<sub>4</sub> (0.01 mmol) in DCM (2 mL) was added a solution of glucal compound **1** (0.2 mmol) in DCM (2 mL) slowly at 0 °C under nitrogen atmosphere. Then the mixture was allowed to warm to room temperature and stirred for 2 h. After that, the solvent DCM was removed under reduced pressure. The residue was purified by column chromatography on silica gel to provide the desired *N*-glycosyl imidazole analogues compound **4** in 83-96% yields.

## Characterization of the *N*-glycosyl imidazole analogues

### The synthesis of compound 4a

#### 1-((4*aR*,6*R*,8*aS*)-2-(4-methoxyphenyl)-4,4*a*,6,8*a*-tetrahydropyrano[3,2-*d*][1,3]dioxin-6-yl)-1*H*-imidazole (4a)

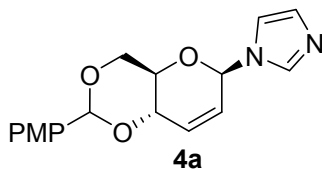

Following the general procedure, the reaction of 4,6-*para*-methoxybenzylidene glucal **1a**<sup>1</sup> (52.8 mg, 0.2 mmol), CDI (48.6 mg, 0.3 mmol), Pd(PPh<sub>3</sub>)<sub>4</sub> (11.6 mg, 0.01 mmol) in DCM (4 mL) was stirred for 2 h at rt. Then the desired product **4a** was obtained by column chromatography on silica gel (eluted with *n*-hexane/EA=1:2) in 93% yield as a white solid. M.p. 160-162 °C; [α]<sub>D</sub><sup>22</sup> +85.8 (*c* 1.0, CHCl<sub>3</sub>); IR (neat)  $\nu$ : 2941, 2881, 1614, 1517, 1249, 1095 cm<sup>-1</sup>; <sup>1</sup>H NMR (CDCl<sub>3</sub>, 400 MHz):  $\delta$  3.79-3.86 (m, 4H), 3.87-3.94 (m, 1H), 4.29 (dd,  $J_1 = 10.0$ ,  $J_2 = 4.2$  Hz, 1H), 4.38-4.44 (m, 1H), 5.60 (s, 1H), 5.88 (ddd,  $J_1 = 10.2$ ,  $J_2 = 2.4$ ,  $J_3 = 1.9$  Hz, 1H), 6.14-6.18 (m, 1H), 6.38 (d,  $J = 10.2$  Hz, 1H), 6.88-6.94 (m, 2H), 7.04 (s, 1H), 7.10 (s, 1H), 7.41-7.46 (m, 2H), 7.67 (s, 1H) ppm; <sup>13</sup>C NMR (CDCl<sub>3</sub>, 100 MHz):  $\delta$  55.3, 68.7, 71.6, 74.1, 81.1, 102.2, 113.7, 117.3, 125.6, 127.5, 129.4, 130.0, 132.8, 136.5, 160.3 ppm; HRMS (ESI) calcd. for C<sub>17</sub>H<sub>19</sub>O<sub>4</sub>N<sub>2</sub> [M+H]: 315.1345; found: 315.1345.

### The synthesis of compound 4b

#### 1-((2*R*,5*S*,6*R*)-5-(benzyloxy)-6-(benzyloxymethyl)-5,6-dihydro-2*H*-pyran-2-yl)-1*H*-imidazole (4b)

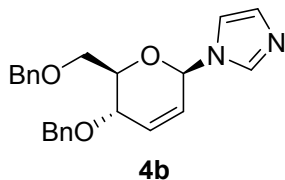

Following the general procedure, the reaction of 4,6-dibenzyl glucal **1b**<sup>2</sup> (65.2 mg, 0.2 mmol), CDI (48.6 mg, 0.3 mmol), Pd(PPh<sub>3</sub>)<sub>4</sub> (11.6 mg, 0.01 mmol) in DCM (4 mL) was stirred for 2 h at rt. Then the desired product **4b** was obtained by column chromatography on silica gel (eluted with MeOH/DCM=1:60) in 89% yield as a white solid. M.p. 82-84 °C; [α]<sub>D</sub><sup>22</sup> +121.5 (*c* 1.0, CHCl<sub>3</sub>); IR (neat)  $\nu$ : 2941, 2866, 1616, 1495, 1452, 1265, 1072 cm<sup>-1</sup>; <sup>1</sup>H NMR (CDCl<sub>3</sub>, 400 MHz):  $\delta$  3.66 (dd,  $J_1 = 11.0$ ,  $J_2 = 5.3$  Hz, 1H), 3.73 (dd,  $J_1 = 11.0$ ,  $J_2 = 2.1$  Hz, 1H), 3.86-3.91 (m, 1H), 4.13-

4.18 (m, 1H), 4.48-4.58 (m, 3H), 4.64 (d,  $J = 11.4$  Hz, 1H), 5.82 (dt,  $J_1 = 10.2$ ,  $J_2 = 1.5$  Hz, 1H), 5.96-5.99 (m, 1H), 6.24 (dt,  $J_1 = 10.2$ ,  $J_2 = 1.8$  Hz, 1H), 7.01 (s, 1H), 7.06 (s, 1H), 7.24-7.36 (m, 10H), 7.63 (s, 1H) ppm;  $^{13}\text{C}$  NMR ( $\text{CDCl}_3$ , 100 MHz):  $\delta$  68.9, 69.4, 71.7, 73.4, 77.7, 80.4, 117.4, 126.1, 127.6, 127.8, 127.9, 128.0, 128.3, 128.4, 129.5, 131.9, 136.4, 137.4, 137.9 ppm; HRMS (ESI) calcd. for  $\text{C}_{23}\text{H}_{25}\text{O}_3\text{N}_2$   $[\text{M}+\text{H}]$ : 377.1865; found: 377.1862.

## The synthesis of compound 4c

### 1-((4a*R*,6*R*,8a*S*)-2,2-di-*tert*-butyl-4,4a,6,8a-tetrahydropyrano[3,2-*d*][1,3,2]dioxasilin-6-yl)-1*H*-imidazole (4c)

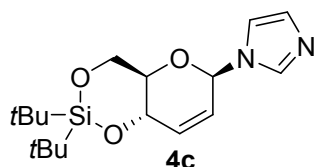

Following the general procedure, the reaction of 4,6-di-*tert*-butylsilyl glucal **1c** (57.3 mg, 0.2 mmol), CDI (48.6 mg, 0.3 mmol),  $\text{Pd}(\text{PPh}_3)_4$  (11.6 mg, 0.01 mmol) in DCM (4 mL) was stirred for 2 h at rt. Then the desired product **4c** was obtained by column chromatography on silica gel (eluted with  $\text{MeOH}/\text{DCM}=1:60$ ) in 85% yield as a white solid. M.p. 139-141 °C;  $[\alpha]_{\text{D}}^{22} +45.5$  ( $c$  1.0,  $\text{CHCl}_3$ ); IR (neat)  $\nu$ : 2931, 2858, 1613, 1472, 1129, 1094  $\text{cm}^{-1}$ ;  $^1\text{H}$  NMR ( $\text{CDCl}_3$ , 400 MHz):  $\delta$  1.01 (s, 9H), 1.07 (s, 9H), 3.80 (ddd,  $J_1 = 10.4$ ,  $J_2 = 8.6$ ,  $J_3 = 5.0$  Hz, 1H), 3.91 (t,  $J = 10.2$  Hz, 1H), 4.17 (dd,  $J_1 = 10.0$ ,  $J_2 = 4.9$  Hz, 1H), 4.57-4.63 (m, 1H), 5.72-5.77 (m, 1H), 6.06-6.09 (m, 1H), 6.27 (dt,  $J_1 = 10.2$ ,  $J_2 = 2.6$  Hz, 1H), 7.00 (s, 1H), 7.07 (s, 1H), 7.63 (s, 1H) ppm;  $^{13}\text{C}$  NMR ( $\text{CDCl}_3$ , 100 MHz):  $\delta$  20.0, 22.7, 26.9, 27.4, 66.4, 69.3, 75.1, 80.8, 117.3, 124.1, 129.8, 135.9, 136.4 ppm; HRMS (ESI) calcd. for  $\text{C}_{17}\text{H}_{29}\text{O}_3\text{N}_2\text{Si}$   $[\text{M}+\text{H}]$ : 337.1947; found: 337.1945.

## The synthesis of compound 4d

### 1-((2*R*,5*S*,6*R*)-6-((*tert*-butyldimethylsilyloxy)methyl)-5-(4-methoxybenzyloxy)-5,6-dihydro-2*H*-pyran-2-yl)-1*H*-imidazole (4d)

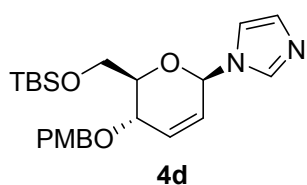

Following the general procedure, the reaction of 4-methoxybenzyl-6-*tert*-butyldimethylsilyl glucal **1d**<sup>4</sup> (76.1

mg, 0.2 mmol), CDI (48.6 mg, 0.3 mmol), Pd(PPh<sub>3</sub>)<sub>4</sub> (11.6 mg, 0.01 mmol) in DCM (4 mL) was stirred for 2 h at rt. Then the desired product **4d** was obtained by column chromatography on silica gel (eluted with *n*-hexane/EA=1:2) in 90% yield as colorless oil. [ $\alpha$ ]<sub>D</sub><sup>22</sup> +110.2 (*c* 1.0, CHCl<sub>3</sub>); IR (neat)  $\nu$ : 2926, 2853, 1607, 1514, 1458, 1254, 1105 cm<sup>-1</sup>; <sup>1</sup>H NMR (CDCl<sub>3</sub>, 400 MHz):  $\delta$  -0.06 (s, 3H), -0.01 (s, 3H), 0.84 (s, 9H), 3.70 (ddd,  $J_1 = 8.5, J_2 = 4.0, J_3 = 2.6$  Hz, 1H), 3.77-3.86 (m, 5H), 4.18 (ddd,  $J_1 = 8.5, J_2 = 4.3, J_3 = 2.0$  Hz, 1H), 4.55 (d,  $J = 11.2$  Hz, 1H), 4.62 (d,  $J = 11.2$  Hz, 1H), 5.81 (dt,  $J_1 = 10.3, J_2 = 1.7$  Hz, 1H), 5.94-5.97 (m, 1H), 6.22 (dt,  $J_1 = 10.3, J_2 = 1.9$  Hz, 1H), 6.87-6.91 (m, 2H), 6.98 (s, 1H), 7.04 (s, 1H), 7.26-7.30 (m, 2H), 7.61 (s, 1H) ppm; <sup>13</sup>C NMR (CDCl<sub>3</sub>, 100 MHz):  $\delta$  -5.31, -5.26, 18.3, 25.8, 55.2, 62.3, 68.6, 71.6, 78.9, 80.4, 113.9, 117.4, 125.8, 129.4, 129.6, 129.8, 132.5, 136.3, 159.4 ppm; HRMS (ESI) calcd. for C<sub>23</sub>H<sub>35</sub>O<sub>4</sub>N<sub>2</sub>Si [M+H]: 431.2366; found: 431.2380.

## The synthesis of compound 4e

### 1-((4a'*R*,6'*R*,8a'*S*)-4',4a',6',8a'-tetrahydrospiro[cyclohexane-1,2'-pyrano[3,2-d][1,3]dioxine]-6'-yl)-1*H*-imidazole (4e)

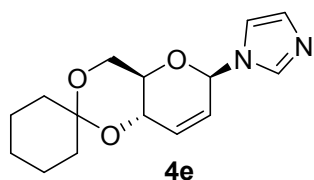

Following the general procedure, the reaction of 4,6-cyclohexylidene glucal **1e**<sup>5</sup> (45.2 mg, 0.2 mmol), CDI (48.6 mg, 0.3 mmol), Pd(PPh<sub>3</sub>)<sub>4</sub> (11.6 mg, 0.01 mmol) in DCM (4 mL) was stirred for 2 h at rt. Then the desired product **4e** was obtained by column chromatography on silica gel (eluted with MeOH/DCM=1:60) in 91% yield as yellow oil. [ $\alpha$ ]<sub>D</sub><sup>22</sup> +67.0 (*c* 1.0, CHCl<sub>3</sub>); IR (neat)  $\nu$ : 2934, 2860, 2939, 1637, 1495, 1267, 1105 cm<sup>-1</sup>; <sup>1</sup>H NMR (CDCl<sub>3</sub>, 400 MHz):  $\delta$  1.39-1.69 (m, 8H), 1.88-2.05 (m, 2H), 3.68-3.76 (m, 1H), 3.81 (t,  $J = 10.2$  Hz, 1H), 3.88 (dd,  $J_1 = 10.5, J_2 = 5.2$  Hz, 1H), 4.45-4.51 (m, 1H), 5.76 (dt,  $J_1 = 10.3, J_2 = 2.2$  Hz, 1H), 6.10-6.14 (m, 1H), 6.26 (d,  $J = 10.2$  Hz, 1H), 7.02 (s, 1H), 7.07 (s, 1H), 7.64 (s, 1H) ppm; <sup>13</sup>C NMR (CDCl<sub>3</sub>, 100 MHz):  $\delta$  22.5, 22.7, 25.5, 27.6, 38.0, 61.7, 65.9, 72.9, 81.2, 100.3, 117.4, 125.3, 129.8, 133.7, 136.5 ppm; HRMS (ESI) calcd. for C<sub>15</sub>H<sub>21</sub>O<sub>3</sub>N<sub>2</sub> [M+H]: 277.1552; found: 277.1552.

## The synthesis of compound 4f

### 1-((4a*R*,6*R*,8a*S*)-2-(4-methoxyphenyl)-4,4a,6,8a-tetrahydropyrano[3,2-*d*][1,3]dioxin-6-yl)-1*H*-imidazole (4f)

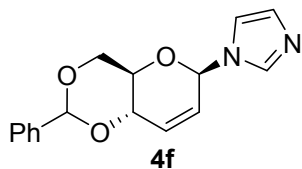

Following the general procedure, the reaction of 4,6-benzylidene glucal **1f**<sup>6</sup> (46.8 mg, 0.2 mmol), CDI (48.6 mg, 0.3 mmol), Pd(PPh<sub>3</sub>)<sub>4</sub> (11.6 mg, 0.01 mmol) in DCM (4 mL) was stirred for 2 h at rt. Then the desired product **4f** was obtained by column chromatography on silica gel (eluted with *n*-hexane/EA=1:2) in 93% yield as a white solid. M.p. 142-144 °C; [α]<sub>D</sub><sup>22</sup> +85.1 (*c* 1.0, CHCl<sub>3</sub>); IR (neat)  $\nu$ : 2976, 2878, 1614, 1495, 1402, 1223, 1096 cm<sup>-1</sup>; <sup>1</sup>H NMR (CDCl<sub>3</sub>, 400 MHz):  $\delta$  3.81-3.95 (m, 2H), 4.31 (dd,  $J_1 = 9.8$ ,  $J_2 = 4.1$  Hz, 1H), 4.40-4.45 (m, 1H), 5.64 (s, 1H), 5.82 (dt,  $J_1 = 10.3$ ,  $J_2 = 1.9$  Hz, 1H), 6.14-6.18 (m, 1H), 6.39 (d,  $J = 10.3$  Hz, 1H), 7.04 (s, 1H), 7.10 (s, 1H), 7.36-7.42 (m, 3H), 7.47-7.54 (m, 2H), 7.67 (s, 1H) ppm; <sup>13</sup>C NMR (CDCl<sub>3</sub>, 100 MHz):  $\delta$  68.7, 71.6, 74.1, 81.1, 102.1, 117.3, 125.6, 126.1, 128.4, 129.3, 130.0, 132.7, 136.5, 136.9 ppm; HRMS (ESI) calcd. for C<sub>16</sub>H<sub>17</sub>O<sub>3</sub>N<sub>2</sub> [M+H]: 285.1239; found: 285.1238.

## The synthesis of compound 4g

### 1-((4a'*R*,6'*R*,8a'*S*)-4',4a',6',8a'-tetrahydrospiro[cyclohexane-1,2'-pyrano[3,2-*d*][1,3]dioxine]-6'-yl)-1*H*-imidazole (4g)

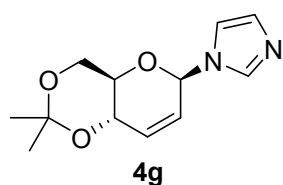

Following the general procedure, the reaction of 4,6-dimethylidene glucal **1g**<sup>7</sup> (37.2 mg, 0.2 mmol), CDI (48.6 mg, 0.3 mmol), Pd(PPh<sub>3</sub>)<sub>4</sub> (11.6 mg, 0.01 mmol) in DCM (4 mL) was stirred for 2 h at rt. Then the desired product **4g** was obtained by column chromatography on silica gel (eluted with *n*-hexane/EA=1:3) in 95% yield as yellow oil. [α]<sub>D</sub><sup>22</sup> +70.5 (*c* 1.0, CHCl<sub>3</sub>); IR (neat)  $\nu$ : 2993, 2885, 1614, 1494, 1375, 1267, 1093 cm<sup>-1</sup>; <sup>1</sup>H NMR (CDCl<sub>3</sub>, 400 MHz):  $\delta$  1.45 (s, 3H), 1.45 (s, 3H), 3.68-3.76 (m, 1H), 3.81 (t,  $J = 10.4$  Hz, 1H), 3.90 (dd,  $J_1 = 10.5$ ,  $J_2 = 5.0$  Hz,



1H), 4.43-4.49 (m, 1H), 5.75-5.80 (m, 1H), 6.10-6.14 (m, 1H), 6.24 (d,  $J = 10.2$  Hz, 1H), 7.00 (s, 1H), 7.06 (s, 1H), 7.62 (s, 1H) ppm;  $^{13}\text{C}$  NMR ( $\text{CDCl}_3$ , 100 MHz):  $\delta$  18.9, 29.0, 62.3, 66.7, 72.6, 81.1, 100.1, 117.3, 125.2, 129.8, 133.5, 136.4 ppm; HRMS (ESI) calcd. for  $\text{C}_{12}\text{H}_{17}\text{O}_3\text{N}_2$  [ $\text{M}+\text{H}$ ]: 237.1239; found: 237.1239.

## The synthesis of compound 4h

### 1-((2*R*,5*S*,6*R*)-5-(*tert*-butyldimethylsilyloxy)-6-((*tert*-butyldimethylsilyloxy)methyl)-5,6-dihydro-2*H*-pyran-2-yl)-1*H*-imidazole (4h)

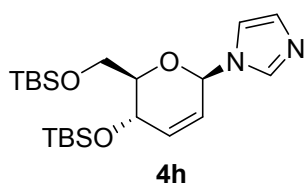

Following the general procedure, the reaction of 4,6- di-*tert*-butyldimethylsilyl galactal **1h**<sup>8</sup> (74.9 mg, 0.2 mmol), CDI (48.6 mg, 0.3 mmol),  $\text{Pd}(\text{PPh}_3)_4$  (11.6 mg, 0.01 mmol) in DCM (4 mL) was stirred for 2 h at rt. Then the desired product **4h** was obtained by column chromatography on silica gel (eluted with *n*-hexane/EA=1:1) in 88% yield as a white solid. IR (neat)  $\nu$ : 2954, 2929, 2857, 1613, 1494, 1471, 1256, 1096  $\text{cm}^{-1}$ ;  $^1\text{H}$  NMR of the major product ( $\beta$ -isomer) ( $\text{CDCl}_3$ , 400 MHz):  $\delta$  -0.08 (s, 3H), -0.04 (s, 3H), 0.11 (s, 3H), 0.13 (s, 3H), 0.83 (s, 9H), 0.90 (s, 9H), 3.53-3.58 (m, 1H), 3.79-3.82 (m, 2H), 4.38-4.43 (m, 1H), 5.75 (dt,  $J_1 = 10.2$ ,  $J_2 = 1.5$  Hz, 1H), 5.94-5.97 (m, 1H), 6.05 (dt,  $J_1 = 10.2$ ,  $J_2 = 1.7$  Hz, 1H), 6.98 (s, 1H), 7.03 (s, 1H), 7.61 (s, 1H) ppm;  $^{13}\text{C}$  NMR of the major product ( $\beta$ -isomer) ( $\text{CDCl}_3$ , 100 MHz):  $\delta$  -5.31, -5.26, 18.3, 25.8, 55.2, 62.3, 68.6, 71.6, 78.9, 80.4, 113.9, 117.4, 125.8, 129.4, 129.6, 129.8, 132.5, 136.3, 159.4 ppm; HRMS (ESI) calcd. for  $\text{C}_{21}\text{H}_{41}\text{O}_3\text{N}_2\text{Si}_2$  [ $\text{M}+\text{H}$ ]: 425.2656; found: 425.2657.

## The synthesis of compound 4i

### 1-((2*R*,5*R*,6*R*)-5-(benzyloxy)-6-(benzyloxymethyl)-5,6-dihydro-2*H*-pyran-2-yl)-1*H*-imidazole (4i)

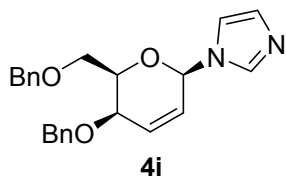

Following the general procedure, the reaction of 4,6-dibenzyl galactal **1i** (65.2 mg, 0.2 mmol), CDI (48.6 mg, 0.3 mmol),  $\text{Pd}(\text{PPh}_3)_4$  (11.6 mg, 0.01 mmol) in DCM (4 mL) was stirred

for 2 h at rt. Then the desired product **4i**<sup>9</sup> was obtained by column chromatography on silica gel (eluted with MeOH/DCM=1:60) in 89% yield as colorless oil.  $[\alpha]_D^{23} -81.2$  (*c* 1.0, CHCl<sub>3</sub>); IR (neat)  $\nu$ : 3030, 2918, 2868, 1614, 1495, 1454, 1269, 1069 cm<sup>-1</sup>; <sup>1</sup>H NMR (CDCl<sub>3</sub>, 400 MHz):  $\delta$  3.71 (dd,  $J_1 = 10.0$ ,  $J_2 = 6.6$  Hz, 1H), 3.75 (dd,  $J_1 = 10.0$ ,  $J_2 = 5.6$  Hz, 1H), 3.86-3.92 (m, 1H), 4.03 (td,  $J_1 = 6.4$ ,  $J_2 = 2.3$  Hz, 1H), 4.50 (d,  $J = 11.9$  Hz, 1H), 4.58 (d,  $J = 11.9$  Hz, 1H), 4.61 (d,  $J = 11.9$  Hz, 1H), 4.68 (d,  $J = 11.9$  Hz, 1H), 5.91-5.98 (m, 2H), 6.30 (ddd,  $J_1 = 10.0$ ,  $J_2 = 5.2$ ,  $J_3 = 1.4$  Hz, 1H), 7.04-7.10 (m, 2H), 7.26-7.37 (m, 10H), 7.66 (s, 1H) ppm; <sup>13</sup>C NMR (CDCl<sub>3</sub>, 100 MHz):  $\delta$  67.1, 69.3, 71.0, 73.6, 76.1, 80.5, 117.5, 127.6, 127.7(2C), 127.8, 128.3, 128.4, 129.3, 129.4, 129.6, 136.5, 137.8, 138.1 ppm; HRMS (ESI) calcd. for C<sub>23</sub>H<sub>25</sub>O<sub>3</sub>N<sub>2</sub> [M+H]: 377.1865; found: 377.1866.

## The synthesis of compound **4j**

### 1-((4*aR*,6*R*,8*aR*)-2,2-di-*tert*-butyl-4,4*a*,6,8*a*-tetrahydropyrano[3,2-d][1,3,2]dioxasilin-6-yl)-1*H*-imidazole (**4j**)

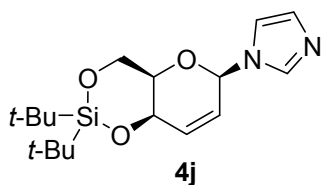

Following the general procedure, the reaction of 4,6-di-*tert*-butylsilyl galactal **1j**<sup>10</sup> (57.3 mg, 0.2 mmol), CDI (48.6 mg, 0.3 mmol), Pd(PPh<sub>3</sub>)<sub>4</sub> (11.6 mg, 0.01 mmol) in DCM (4 mL) was stirred for 2 h at rt. Then the desired product **4j** was obtained by column chromatography on silica gel (eluted with MeOH/DCM=1:60) in 83% yield as a white solid. M.p. 118-120 °C;  $[\alpha]_D^{23} -39.5$  (*c* 1.0, CHCl<sub>3</sub>); IR (neat)  $\nu$ : 2933, 2859, 1614, 1497, 1474, 1263, 1146, 1070 cm<sup>-1</sup>; <sup>1</sup>H NMR (CDCl<sub>3</sub>, 400 MHz):  $\delta$  0.97 (s, 9H), 1.06 (s, 9H), 3.67-3.72 (m, 1H), 4.17 (dd,  $J_1 = 12.8$ ,  $J_2 = 1.6$  Hz, 1H), 4.36 (dd,  $J_1 = 12.8$ ,  $J_2 = 2.3$  Hz, 1H), 4.50-4.55 (m, 1H), 5.92-5.97 (m, 2H), 6.30-6.37 (m, 1H), 7.06 (s, 2H), 7.66 (s, 1H) ppm; <sup>13</sup>C NMR (CDCl<sub>3</sub>, 100 MHz):  $\delta$  20.3, 23.1, 27.1, 27.4, 64.8, 66.2, 73.2, 81.0, 117.9, 127.0, 129.5, 132.2, 136.8 ppm; HRMS (ESI) calcd. for C<sub>17</sub>H<sub>29</sub>O<sub>3</sub>N<sub>2</sub>Si [M+H]: 337.1947; found: 337.1947.

## The synthesis of compound 4k

### 1-((4*aR*,6*R*,8*aS*)-2-(4-methoxyphenyl)-4,4*a*,6,8*a*-tetrahydropyrano[3,2-*d*][1,3]dioxin-6-yl)-2-methyl-1*H*-imidazole (4k)

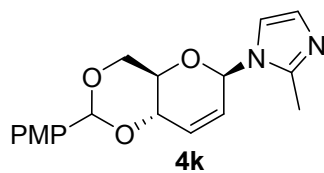

Following the general procedure, the reaction of 4,6-*para*-methoxybenzylidene glucal **1a** (52.8 mg, 0.2 mmol), 1,1'-Carbonylbis(2-methylimidazole) (57.1 mg, 0.3 mmol), Pd(PPh<sub>3</sub>)<sub>4</sub> (11.6 mg, 0.01 mmol) in DCM (4 mL) was stirred for 2 h at rt. Then the desired product **4k** was obtained by column chromatography on silica gel (eluted with MeOH/DCM=1:40) in 96% yield as a white solid. M.p. 136-138 °C; [α]<sub>D</sub><sup>23</sup> +66.9 (*c* 1.0, CHCl<sub>3</sub>); IR (neat) *ν*: 2970, 2933, 2879, 1614, 1517, 1417, 1249, 1092 cm<sup>-1</sup>; <sup>1</sup>H NMR (CDCl<sub>3</sub>, 400 MHz): δ 2.46 (s, 3H), 3.78-3.86 (m, 4H), 3.90 (ddd, *J*<sub>1</sub> = 10.3, *J*<sub>2</sub> = 8.4, *J*<sub>3</sub> = 4.4 Hz, 1H), 4.28 (dd, *J*<sub>1</sub> = 10.0, *J*<sub>2</sub> = 4.2 Hz, 1H), 4.36-4.42 (m, 1H), 5.59 (s, 1H), 5.77 (ddd, *J*<sub>1</sub> = 10.3, *J*<sub>2</sub> = 2.4, *J*<sub>3</sub> = 2.0 Hz, 1H), 6.08-6.12 (m, 1H), 6.35 (d, *J* = 10.3 Hz, 1H), 6.88-6.93 (m, 4H), 7.41-7.46 (m, 2H) ppm; <sup>13</sup>C NMR (CDCl<sub>3</sub>, 100 MHz): δ 13.1, 55.2, 68.6, 71.5, 74.1, 80.1, 102.0, 113.6, 116.7, 125.8, 127.4, 127.5, 129.4, 132.2, 145.1, 160.2 ppm; HRMS (ESI) calcd. for C<sub>18</sub>H<sub>21</sub>O<sub>4</sub>N<sub>2</sub> [M+H]: 329.1501; found: 329.1501.

## The synthesis of compound 4l

### 1-((2*R*,5*S*,6*R*)-5-(benzyloxy)-6-(benzyloxymethyl)-5,6-dihydro-2*H*-pyran-2-yl)-2-methyl-1*H*-imidazole (4l)

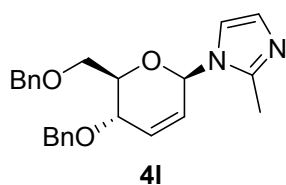

Following the general procedure, the reaction of 4,6-dibenzyl glucal **1b** (65.2 mg, 0.2 mmol), 1,1'-Carbonylbis(2-methylimidazole) (57.1 mg, 0.3 mmol), Pd(PPh<sub>3</sub>)<sub>4</sub> (11.6 mg, 0.01 mmol) in DCM (4 mL) was stirred for 2 h at rt. Then the desired product **4l** was obtained by column chromatography on silica gel (eluted with MeOH/DCM=1:40) in 92% yield as yellow oil. [α]<sub>D</sub><sup>23</sup> +83.9 (*c* 1.0, CHCl<sub>3</sub>); IR (neat) *ν*: 3030, 2920, 2866, 1614, 1531, 1454, 1417, 1273, 1092 cm<sup>-1</sup>; <sup>1</sup>H NMR (CDCl<sub>3</sub>, 400 MHz): δ 2.44 (m, 3H), 3.68 (dd, *J*<sub>1</sub> = 11.0, *J*<sub>2</sub> = 5.1 Hz, 1H), 3.74 (dd, *J*<sub>1</sub>

= 11.0,  $J_2 = 2.0$  Hz, 1H), 3.86-3.92 (m, 1H), 4.14-4.20 (m, 1H), 4.47-4.58 (m, 3H), 4.64 (d,  $J = 11.4$  Hz, 1H), 5.78-5.83 (m, 1H), 5.91-5.95 (m, 1H), 6.21-6.27 (m, 1H), 6.87 (s, 1H), 6.88 (s, 1H), 7.24-7.37 (m, 10H) ppm;  $^{13}\text{C}$  NMR ( $\text{CDCl}_3$ , 100 MHz):  $\delta$  13.2, 69.0, 69.5, 71.7, 73.4, 77.7, 79.6, 117.0, 126.2, 127.2, 127.6, 127.7, 127.9(2C), 128.3, 128.4, 131.6, 137.5, 137.9, 145.1 ppm; HRMS (ESI) calcd. for  $\text{C}_{24}\text{H}_{27}\text{O}_3\text{N}_2$  [M+H]: 391.2022; found: 391.2021.

## The synthesis of compound 4m

### 1-((2*R*,5*R*,6*R*)-5-(benzyloxy)-6-(benzyloxymethyl)-5,6-dihydro-2*H*-pyran-2-yl)-2-methyl-1*H*-imidazole (4m)

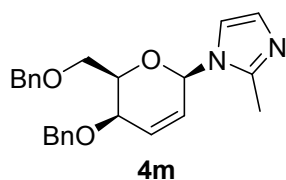

Following the general procedure, the reaction of 4,6-dibenzyl galactal **1i** (65.2 mg, 0.2 mmol), 1,1'-Carbonylbis (2-methylimidazole) (57.1 mg, 0.3 mmol),  $\text{Pd}(\text{PPh}_3)_4$  (11.6 mg, 0.01 mmol) in DCM (4 mL) was stirred for 2 h at rt. Then the desired product **4m** was obtained by column chromatography on silica gel (eluted with MeOH/DCM=1:40) in 94% yield as yellow oil.  $[\alpha]_{\text{D}}^{23} -82.6$  ( $c$  1.0,  $\text{CHCl}_3$ ); IR (neat)  $\nu$ : 2920, 2868, 1614, 1537, 1497, 1545, 1417, 1273, 1097  $\text{cm}^{-1}$ ;  $^1\text{H}$  NMR ( $\text{CDCl}_3$ , 400 MHz):  $\delta$  2.46 (m, 3H), 3.74 (dd,  $J_1 = 10.0$ ,  $J_2 = 6.5$  Hz, 1H), 3.82 (dd,  $J_1 = 10.0$ ,  $J_2 = 5.7$  Hz, 1H), 3.89-3.94 (m, 1H), 4.06 (td,  $J_1 = 6.2$ ,  $J_2 = 2.3$  Hz, 1H), 4.53 (d,  $J = 11.8$  Hz, 1H), 4.61 (d,  $J = 11.8$  Hz, 1H), 4.63 (d,  $J = 11.9$  Hz, 1H), 4.70 (d,  $J = 11.9$  Hz, 1H), 5.88-5.92 (m, 1H), 5.98 (dd,  $J_1 = 10.2$ ,  $J_2 = 1.2$  Hz, 1H), 6.33 (ddd,  $J_1 = 10.1$ ,  $J_1 = 5.3$ ,  $J_2 = 1.8$  Hz, 1H), 6.93 (d,  $J = 1.2$  Hz, 1H), 6.98 (d,  $J = 1.2$  Hz, 1H), 7.29-7.40 (m, 10H) ppm;  $^{13}\text{C}$  NMR ( $\text{CDCl}_3$ , 100 MHz):  $\delta$  13.3, 67.1, 69.3, 71.1, 73.6, 76.2, 79.8, 117.3, 127.3, 127.6, 127.7(2C), 128.4, 129.1, 129.6, 137.9, 138.2, 145.1 ppm; HRMS (ESI) calcd. for  $\text{C}_{24}\text{H}_{27}\text{O}_3\text{N}_2$  [M+H]: 391.2022; found: 391.2022.

## The synthesis of compound 4n

### 1-((4*aR*,6*R*,8*aS*)-2-(4-methoxyphenyl)-4,4*a*,6,8*a*-tetrahydropyrano[3,2-d][1,3]dioxin-6-yl)-2-phenyl-1*H*-imidazole (4n)

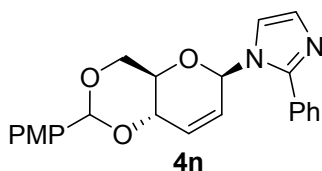

Following the general procedure, the reaction of 4,6-*para*-

methoxybenzylidene glucal **1a** (52.8 mg, 0.2 mmol), 1,1'-Carbonylbis(2-phenylimidazole) (94.3 mg, 0.3 mmol), Pd(PPh<sub>3</sub>)<sub>4</sub> (11.6 mg, 0.01 mmol) in DCM (4 mL) was stirred for 2 h at rt. Then the desired product **4n** was obtained by column chromatography on silica gel (eluted with *n*-hexane/EA=1:1) in 86% yield as a white solid. M.p. 186-188 °C; [α]<sub>D</sub><sup>23</sup> -38.5 (*c* 1.0, CHCl<sub>3</sub>); IR (neat) *ν*: 2933, 2868, 1614, 1517, 1467, 1250, 1096 cm<sup>-1</sup>; <sup>1</sup>H NMR (CDCl<sub>3</sub>, 400 MHz): δ 3.80 (s, 3H), 3.84-3.94 (m, 2H), 4.29-4.39 (m, 1H), 4.40-4.48 (m, 1H), 5.61 (s, 1H), 5.73 (dt, *J*<sub>1</sub> = 10.3, *J*<sub>2</sub> = 2.1 Hz, 1H), 6.16-6.21 (m, 1H), 6.32 (d, *J* = 10.2 Hz, 1H), 6.88-6.93 (m, 2H), 7.13 (d, *J* = 1.2 Hz, 1H), 7.16 (d, *J* = 1.2 Hz, 1H), 7.40-7.51 (m, 5H), 7.68-7.74 (m, 2H) ppm; <sup>13</sup>C NMR (CDCl<sub>3</sub>, 100 MHz): δ 55.3, 68.7, 71.6, 74.2, 80.4, 102.1, 113.7, 117.7, 126.3, 127.5, 128.6, 129.0, 129.1, 129.2, 129.4, 129.9, 132.0, 148.3, 160.2 ppm; HRMS (ESI) calcd. for C<sub>23</sub>H<sub>23</sub>O<sub>4</sub>N<sub>2</sub> [M+H]: 391.1658; found: 391.1658.

## The synthesis of compound 4o

### 1-((4*aR*,6*R*,8*aS*)-2-(4-methoxyphenyl)-4,4*a*,6,8*a*-tetrahydropyrano[3,2-*d*][1,3]dioxin-6-yl)-2,4-dimethyl-1*H*-imidazole (4o)

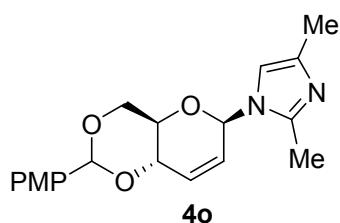

Following the general procedure, the reaction of 4,6-*para*-methoxybenzylidene glucal **1a** (52.8 mg, 0.2 mmol), 1,1'-Carbonylbis(2,4-dimethylimidazole) (65.5 mg, 0.3 mmol), Pd(PPh<sub>3</sub>)<sub>4</sub> (11.6 mg, 0.01 mmol) in DCM (4 mL) was stirred for 2 h at rt. Then the desired product **4o** was

obtained by column chromatography on silica gel (eluted with DCM/MeOH=50:1) in 92% yield as a yellow oil. [α]<sub>D</sub><sup>21</sup> +78.9 (*c* 1.0, CHCl<sub>3</sub>); IR (neat) *ν*: 2969, 2935, 2870, 1616, 1521, 1469, 1249, 1097 cm<sup>-1</sup>; <sup>1</sup>H NMR (CDCl<sub>3</sub>, 400 MHz): 2.16 (s, 3H), 2.42 (s, 3H), 3.77-3.91 (m, 5H), 4.27 (dd, *J*<sub>1</sub> = 9.6 Hz, *J*<sub>2</sub> = 3.8 Hz, 1H), 4.34-4.40 (m, 1H), 5.58 (s, 1H), 5.74 (dt, *J*<sub>1</sub> = 10.2, *J*<sub>2</sub> = 2.0 Hz, 1H), 6.00-6.05 (m, 1H), 6.32 (d, *J* = 10.2 Hz, 1H), 6.62 (s, 1H), 6.87-6.93 (m, 2H), 7.40-7.46 (m, 2H) ppm; <sup>13</sup>C NMR (CDCl<sub>3</sub>, 100 MHz): δ 12.9, 13.4, 55.2, 68.7, 71.4, 74.2, 80.1, 102.1, 112.8, 113.7, 126.1, 127.4, 129.5, 132.0, 136.5, 144.4, 160.2 ppm; HRMS (ESI) calcd. for

C<sub>19</sub>H<sub>23</sub>O<sub>4</sub>N<sub>2</sub> [M+H]: 343.1658; found: 343.1655.

### The synthesis of compound 4p

#### 1-((4a*R*,6*R*,8a*S*)-2-(4-methoxyphenyl)-4,4a,6,8a-tetrahydropyrano[3,2-*d*][1,3]dioxin-6-yl)-4,5-diphenyl-1*H*-imidazole (4p)

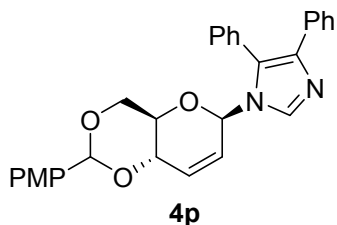

Following the general procedure, the reaction of 4,6-*para*-methoxybenzylidene glucal **1a** (52.8 mg, 0.2 mmol), 1,1'-Carbonylbis(4,5-diphenylimidazole) (140.0 mg, 0.3 mmol), Pd(PPh<sub>3</sub>)<sub>4</sub> (11.6 mg, 0.01 mmol) in DCM (4 mL) was stirred for 2 h at rt. Then the desired product **4p** was obtained by column chromatography on silica gel (eluted with *n*-hexane/EA=1:1) in 75% yield as a yellow solid. M.p. 189-191 °C; [α]<sub>D</sub><sup>21</sup> +5.8 (*c* 1.0, CHCl<sub>3</sub>); IR (neat) *ν*: 2983, 2940, 2874, 1620, 1523, 1467, 1253, 1100 cm<sup>-1</sup>; <sup>1</sup>H NMR (CDCl<sub>3</sub>, 400 MHz): 3.73-3.86 (m, 5H), 4.26 (dd, *J*<sub>1</sub> = 9.6 Hz, *J*<sub>2</sub> = 3.8 Hz, 1H), 4.28-4.33 (m, 1H), 5.56 (s, 1H), 5.76 (dt, *J*<sub>1</sub> = 10.2, *J*<sub>2</sub> = 2.2 Hz, 1H), 5.84-5.88 (m, 1H), 6.27 (d, *J* = 10.2 Hz, 1H), 6.86-6.91 (m, 2H), 7.12-7.23 (m, 3H), 7.38-7.49 (m, 9H), 7.76 (s, 1H) ppm; <sup>13</sup>C NMR (CDCl<sub>3</sub>, 100 MHz): δ 55.3, 68.7, 71.6, 74.1, 79.5, 102.1, 113.7, 125.8, 126.6, 126.8, 127.5, 128.1(2C), 128.9(2C), 129.5, 129.8, 131.2, 132.4, 134.1, 135.3, 138.6, 160.2 ppm; HRMS (ESI) calcd. for C<sub>29</sub>H<sub>27</sub>O<sub>4</sub>N<sub>2</sub> [M+H]: 467.1971; found: 467.1975.

### The synthesis of compound 4q

#### 1-((4a*R*,6*R*,8a*S*)-2-(4-methoxyphenyl)-4,4a,6,8a-tetrahydropyrano[3,2-*d*][1,3]dioxin-6-yl)-1*H*-benzo[d]imidazole (4q)

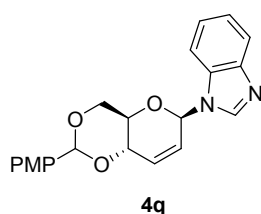

Following the general procedure, the reaction of 4,6-*para*-methoxybenzylidene glucal **1a** (52.8 mg, 0.2 mmol), 1,1'-Carbonylbisbenzimidazole (78.6 mg, 0.3 mmol), Pd(PPh<sub>3</sub>)<sub>4</sub> (11.6 mg, 0.01 mmol) in DCM (4 mL) was stirred for 2 h at rt. Then the desired product **4q** was obtained by column chromatography on silica gel (eluted with *n*-hexane/EA=1:1) in 85% yield as a white solid. a light yellow oil. [α]<sub>D</sub><sup>23</sup>

= +63.2 ( $c = 1.0$  in  $\text{CHCl}_3$ ); IR (neat)  $\nu$ : 2968, 2937, 2871, 1615, 1520, 1466, 1254, 1095  $\text{cm}^{-1}$ ;  $^1\text{H}$  NMR (400 MHz,  $\text{CDCl}_3$ ):  $\delta$  3.77-3.87 (m, 4H), 4.00 (ddd,  $J_1 = 10.2$  Hz,  $J_2 = 8.6$  Hz,  $J_3 = 4.7$  Hz, 1H), 4.30 (dd,  $J_1 = 10.4$  Hz,  $J_2 = 4.6$  Hz, 1H), 7.92-8.40 (m, 1H), 4.47-4.54 (m, 1H), 5.63 (s, 1H), 5.86-5.95 (m, 1H), 6.41-6.50 (m, 2H), 6.88-6.95 (m, 2H), 7.27-7.36 (m, 2H), 7.40-7.48 (m, 2H), 7.48-7.58 (m, 1H), 7.76-7.89 (m, 1H) ppm;  $^{13}\text{C}$  NMR (100 MHz,  $\text{CDCl}_3$ ):  $\delta$  55.3, 68.7, 71.7, 74.3, 80.5, 102.2, 110.7, 113.7, 120.7, 122.9, 123.5, 125.6, 127.5, 129.5, 133.2, 160.3 ppm; HRMS (ESI) calcd. for  $\text{C}_{21}\text{H}_{21}\text{N}_2\text{O}_4$   $[\text{M}+\text{H}]^+$ : 365.1501, found: 365.1497.

## The synthesis of compound 4r

### 1-((4aR,6R,8aS)-2-(4-methoxyphenyl)-4,4a,6,8a-tetrahydropyrano[3,2-d][1,3]dioxin-6-yl)-2-methyl-1H-benzo[d]imidazole (4r)

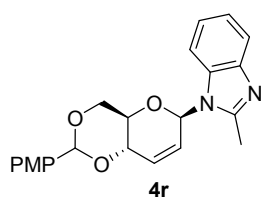

Following the general procedure, the reaction of 4,6-*para*-methoxybenzylidene glucal **1a** (52.8 mg, 0.2 mmol), 1,1'-Carbonylbis(2-methylbenzimidazole) (87.1 mg, 0.3 mmol),  $\text{Pd}(\text{PPh}_3)_4$  (11.6 mg, 0.01 mmol) in DCM (4 mL) was stirred for 2 h at rt. Then the desired product **4r** was obtained by column chromatography on silica gel (eluted with *n*-hexane/EA=1:1) in 78% yield as light yellow oil.  $[\alpha]_{\text{D}}^{23} = +132.3$  ( $c = 1.0$  in  $\text{CHCl}_3$ ); IR (neat)  $\nu$ : 2935, 2870, 1614, 1518, 1467, 1253, 1099  $\text{cm}^{-1}$ ;  $^1\text{H}$  NMR (400 MHz,  $\text{CDCl}_3$ ):  $\delta$  2.68 (s, 3H), 3.81 (s, 3H), 3.86 (t,  $J = 10.3$  Hz, 1H), 4.02 (ddd,  $J_1 = 10.2$  Hz,  $J_2 = 8.5$  Hz,  $J_3 = 4.6$  Hz, 1H), 4.31 (dd,  $J_1 = 10.3$  Hz,  $J_2 = 4.6$  Hz, 1H), 4.51-4.59 (m, 1H), 5.66 (s, 1H), 5.81-5.88 (m, 1H), 6.37-6.46 (m, 2H), 6.88-6.96 (m, 2H), 7.18-7.28 (m, 2H), 7.39-7.49 (m, 3H), 7.64-7.73 (m, 1H) ppm;  $^{13}\text{C}$  NMR (100 MHz,  $\text{CDCl}_3$ ):  $\delta$  14.5, 55.3, 68.7, 71.9, 74.5, 80.4, 102.3, 110.7, 113.8, 119.4, 122.5(2C), 126.5, 127.5, 129.5, 132.1, 133.8, 142.8, 151.5, 160.3 ppm; HRMS (ESI) calcd. for  $\text{C}_{22}\text{H}_{23}\text{N}_2\text{O}_4$   $[\text{M}+\text{H}]^+$ : 379.1658, found: 379.1669.

## The synthesis of compound 4s

### 9-((4aR,6R,8aS)-2-(4-methoxyphenyl)-4,4a,6,8a-tetrahydropyrano[3,2-

### d][1,3]dioxin-6-yl)-9H-purine (4s)

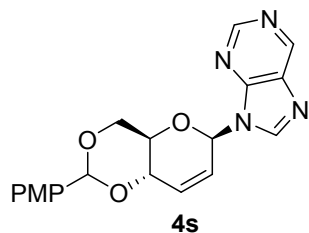

Following the general procedure, the reaction of 4,6-*para*-methoxybenzylidene glucal **1a** (52.8 mg, 0.2 mmol), 1,1'-Carbonylbis(2-methylbenzimidazole) (79.8 mg, 0.3 mmol), Pd(PPh<sub>3</sub>)<sub>4</sub> (11.6 mg, 0.01 mmol) in DCM (4 mL) was stirred for 2 h at rt. Then the desired product **4s** was

obtained by column chromatography on silica gel (eluted with DCM/MeOH =50:1) in 83% yield as a colorless oil.  $[\alpha]_{\text{D}}^{21} +34.0$  (*c* 1.0, CHCl<sub>3</sub>); IR (neat)  $\nu$ : 2944, 2875, 1618, 1521, 1475, 1250, 1104 cm<sup>-1</sup>; <sup>1</sup>H NMR (400 MHz, CDCl<sub>3</sub>):  $\delta$  3.78-3.86 (m, 4H), 4.02 (ddd,  $J_1 = 10.2$ ,  $J_2 = 8.5$ ,  $J_3 = 4.7$  Hz, 1H), 4.33 (dd,  $J_1 = 10.4$ ,  $J_2 = 4.6$  Hz, 1H), 4.47-4.53 (m, 1H), 5.63 (s, 1H), 5.90 (dt,  $J_1 = 10.2$ ,  $J_2 = 2.2$  Hz, 1H), 6.51 (d,  $J = 10.2$  Hz, 1H), 6.81-6.84 (m, 1H), 6.88-6.94 (m, 2H), 7.42-7.47 (m, 2H), 8.22 (s, 1H), 9.04 (s, 1H), 9.18 (s, 1H) ppm; <sup>13</sup>C NMR (100 MHz, CDCl<sub>3</sub>):  $\delta$  55.2, 68.5, 71.8, 74.0, 77.9, 102.2, 113.7, 124.5, 127.4, 129.3, 133.9, 134.1, 143.1, 148.9, 150.9, 153.0, 160.2 ppm; HRMS (ESI) calcd. for C<sub>19</sub>H<sub>19</sub>N<sub>4</sub>O<sub>4</sub> [M+H]<sup>+</sup>: 367.1406, found: 367.1401.

### The synthesis of compound 4t

#### benzyl(9-((4aR,6R,8aS)-2-(4-methoxyphenyl)-4,4a,6,8a-tetrahydropyrano[3,2-d][1,3]dioxin-6-yl)-9H-purin-6-yl)carbamate (4t)

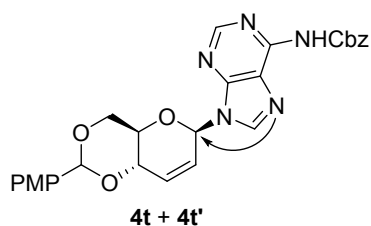

Following the general procedure, the reaction of 4,6-*para*-methoxybenzylidene glucal **1a** (52.8 mg, 0.2 mmol), CDI analogue **2t** (169.4 mg, 0.3 mmol), Pd(PPh<sub>3</sub>)<sub>4</sub> (11.6 mg, 0.01 mmol) in DCM (4 mL) was

stirred for 2 h at rt. Then the desired product **4t** was obtained by column chromatography on silica gel (eluted with DCM/MeOH =50:1) in 42% yield as yellow oil. <sup>1</sup>H NMR of the major product (400 MHz, CDCl<sub>3</sub>):  $\delta$  3.76-3.87 (m, 4H), 3.99 (ddd,  $J_1 = 10.2$ ,  $J_2 = 8.6$ ,  $J_3 = 4.7$  Hz, 1H), 4.32 (dd,  $J_1 = 10.3$ ,  $J_2 = 4.6$  Hz, 1H), 4.42-4.48 (m, 1H), 5.30 (s, 2H), 5.61 (s, 1H), 5.80 (dt,  $J_1 = 10.3$ ,  $J_2 = 2.3$  Hz, 1H), 6.47 (d,  $J = 10.2$  Hz, 1H), 6.71-6.75 (m, 1H), 6.88-6.94 (m, 2H), 7.33-7.46 (m, 7H),



8.05 (s, 1H), 8.80 (s, 1H), 8.97 (s, 1H) ppm;  $^{13}\text{C}$  NMR of the major product (100 MHz,  $\text{CDCl}_3$ ):  $\delta$  55.3, 67.8, 68.6, 71.8, 74.0, 78.2, 102.2, 113.7, 121.9, 124.5, 127.5, 128.5(2C), 128.6, 129.3, 133.9, 135.4, 140.8, 149.6, 151.0, 151.1, 153.3, 160.3 ppm; HRMS (ESI) calcd. for  $\text{C}_{27}\text{H}_{26}\text{N}_5\text{O}_6$ [M+H] $^+$ : 516.1883, found: 516.1891.

### The synthesis of compound **4u** and **4u'**

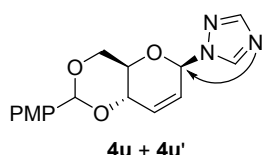

Following the general procedure, the reaction of 4,6-*para*-methoxybenzylidene glucal **1a** (52.8 mg, 0.2 mmol), 1,1'-carbonyl-di-(1,2,4-triazole) (49.3 mg, 0.3 mmol),  $\text{Pd}(\text{PPh}_3)_4$  (11.6 mg, 0.01 mmol) in DCM (4 mL) was stirred for 2 h at rt. Then the desired products **4u** and **4u'** (an inseparable mixture with a ratio of 10:1) were obtained by column chromatography on silica gel (eluted with *n*-hexane/EA=1:2) in 93% yield as a white solid. IR (neat)  $\nu$ : 2933, 2887, 1614, 1516, 1375, 1252, 1103  $\text{cm}^{-1}$ ;  $^1\text{H}$  NMR of the major product ( $\text{CDCl}_3$ , 400 MHz):  $\delta$  3.75-3.90 (m, 4H), 3.91-4.00 (m, 1H), 4.32 (dd,  $J_1 = 10.1$ ,  $J_2 = 4.3$  Hz, 1H), 4.42-4.49 (m, 1H), 5.61 (s, 1H), 5.87-5.94 (m, 1H), 6.38-6.48 (m, 2H), 6.87-6.97 (m, 2H), 7.39-7.50 (m, 2H), 8.01 (s, 1H), 8.27 (s, 1H) ppm;  $^{13}\text{C}$  NMR of the major product ( $\text{CDCl}_3$ , 100 MHz):  $\delta$  55.3, 68.6, 71.7, 74.0, 83.0, 102.2, 113.7, 124.2, 127.5, 129.4, 133.3, 142.7, 152.4, 160.3 ppm; HRMS (ESI) calcd. for  $\text{C}_{16}\text{H}_{18}\text{O}_4\text{N}_3$  [M+H]: 316.1297; found: 316.1297.

### The synthesis of compound **4v** and **4v'**

Following the general procedure, the reaction of 4,6-di-*tert*-butylsilyl glucal **1c** (57.3 mg, 0.2 mmol), 1,1'-carbonyl-di-(1,2,4-triazole) (49.3 mg, 0.3 mmol),  $\text{Pd}(\text{PPh}_3)_4$  (11.6 mg, 0.01 mmol) in DCM (4 mL) was stirred for 2 h at rt. Then the desired products **4v** and **4v'** (an inseparable mixture with a ratio of 5:1) were obtained by column chromatography on silica gel (eluted with *n*-hexane/EA=1:1) in 90% yield as a white solid. IR (neat)  $\nu$ : 2964, 2932, 2884, 2859, 1635, 1504, 1473, 1277, 1130, 1094  $\text{cm}^{-1}$ ;  $^1\text{H}$  NMR of the major product ( $\text{CDCl}_3$ , 400 MHz):  $\delta$  1.01 (s, 9H), 1.07 (s, 9H), 3.81-3.89 (m, 1H), 3.94 (t,  $J = 10.3$  Hz, 1H), 4.21 (dd,  $J_1 = 9.8$ ,  $J_2 = 4.8$  Hz, 1H),

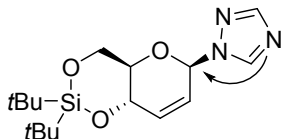

**4v + 4v'**

4.63-4.68 (m, 1H), 5.81-5.87 (m, 1H), 6.31-6.36 (m, 2H), 7.98 (s, 1H), 8.24 (s, 1H) ppm; <sup>13</sup>C NMR of the major product (CDCl<sub>3</sub>, 100 MHz): δ 20.0, 22.6, 26.9, 27.3, 66.3, 69.1, 75.2, 82.8, 122.7, 136.5, 142.6, 152.2 ppm; HRMS (ESI) calcd. for C<sub>16</sub>H<sub>28</sub>O<sub>3</sub>N<sub>3</sub>Si [M+H]: 338.1900; found: 338.1897.

## The synthesis of compound 6

### 1-((4*aR*,6*S*,8*aS*)-2-(4-methoxyphenyl)-4,4*a*,6,8*a*-tetrahydropyrano[3,2-*d*][1,3]dioxin-6-yl)-1*H*-imidazole (**6**)

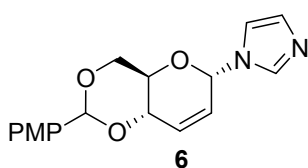

Following the general procedure, the reaction of compound **5** (52.8 mg, 0.2 mmol), CDI (48.6 mg, 0.3 mmol), Pd(PPh<sub>3</sub>)<sub>4</sub> (11.6 mg, 0.01 mmol) in DCM (4 mL) was stirred for 2 h at rt. Then the desired product **6** ( $\alpha$ : $\beta$ =17:1) was obtained by column chromatography on silica gel (eluted with *n*-hexane/EA =1:2) in 80% yield as a white solid. IR (neat)  $\nu$ : 2967, 2934, 2882, 1614, 1518, 1302, 1250, 1096 cm<sup>-1</sup>; <sup>1</sup>H NMR of compound **6** ( $\alpha$ -isomer) (CDCl<sub>3</sub>, 400 MHz): δ 3.61-3.68 (m, 1H), 3.76 (t, *J* = 10.2 Hz, 1H), 3.80 (s, 3H), 4.7 (dd, *J*<sub>1</sub> = 10.2, *J*<sub>2</sub> = 4.6 Hz, 1H), 4.23-4.29 (m, 1H), 5.57 (s, 1H), 5.94 (dt, *J*<sub>1</sub> = 10.2, *J*<sub>2</sub> = 2.6 Hz, 1H), 5.98-6.02 (m, 1H), 6.46 (d, *J* = 10.2 Hz, 1H), 6.87-6.93 (m, 2H), 7.14 (s, 2H), 7.39-7.44 (m, 2H), 7.73 (s, 1H) ppm; <sup>13</sup>C NMR of compound **6** ( $\alpha$ -isomer) (CDCl<sub>3</sub>, 100 MHz): δ 55.3, 64.9, 69.0, 74.3, 78.1, 102.2, 113.7, 118.5, 123.4, 127.5, 129.4, 129.6, 133.5, 136.9, 160.3 ppm; HRMS (ESI) calcd. for C<sub>17</sub>H<sub>19</sub>O<sub>4</sub>N<sub>2</sub> [M+H]: 315.1345; found: 315.1346.

## Reference

1. J. Ma, Y. hao, S. Ng, J. Zhang, A. Than, P. Chen and X.-W. Liu, *Chem.-Eur. J.*, 2010, **16**, 4533.
2. A. Dios, A. Geer, C. H. Marzabadi and R. W. Franck, *J. Org. Chem.*, 1998, **63**, 6673.
3. I. Marin, J. Castilla, M. I. Matheu, Y. Diaz and S. Castillon, *J. Org. Chem.*, 2011, **76**, 9622.
4. J. Zeng, J. Ma, S. Xiang, S. Cai and X.-W. Liu, *Angew. Chem. Int. Ed.*, 2013, **52**, 5134.
5. E. A. Mensah, J. M. Azzarelli and H. M. Nguyen, *J. Org. Chem.*, 2009, **74**, 1650.
6. T. Sakakibara, T. Ito, C. Kotaka, Y. Kajihara, Y. Watanabe and A. Fujioka, *Carbohydr. Res.*, 2008, **16**, 2740.
7. S. E. Denmark, T. Kobayashi and C. S. Regens, *Tetrahedron*, 2010, **66**, 4745.
8. M. C. Pirrung and Y. R. Lee, *J. Chem. Soc. Chem. Comm.*, 1995, **6**, 673.
9. J. Kalikanda and Z. Li, *J. Org. Chem.*, 2011, **13**, 5207.
10. A. A. H. Abdel-Rahman, G. A. Winterfeld, M. Takhi and R. R. Schmidt, *Eur. J. Org. Chem.*, 2002, 713.

# <sup>1</sup>H NMR Spectral for 4b-4d with or without palladium catalyst

## <sup>1</sup>H NMR spectral of 4b without Pd(PPh<sub>3</sub>)<sub>4</sub>

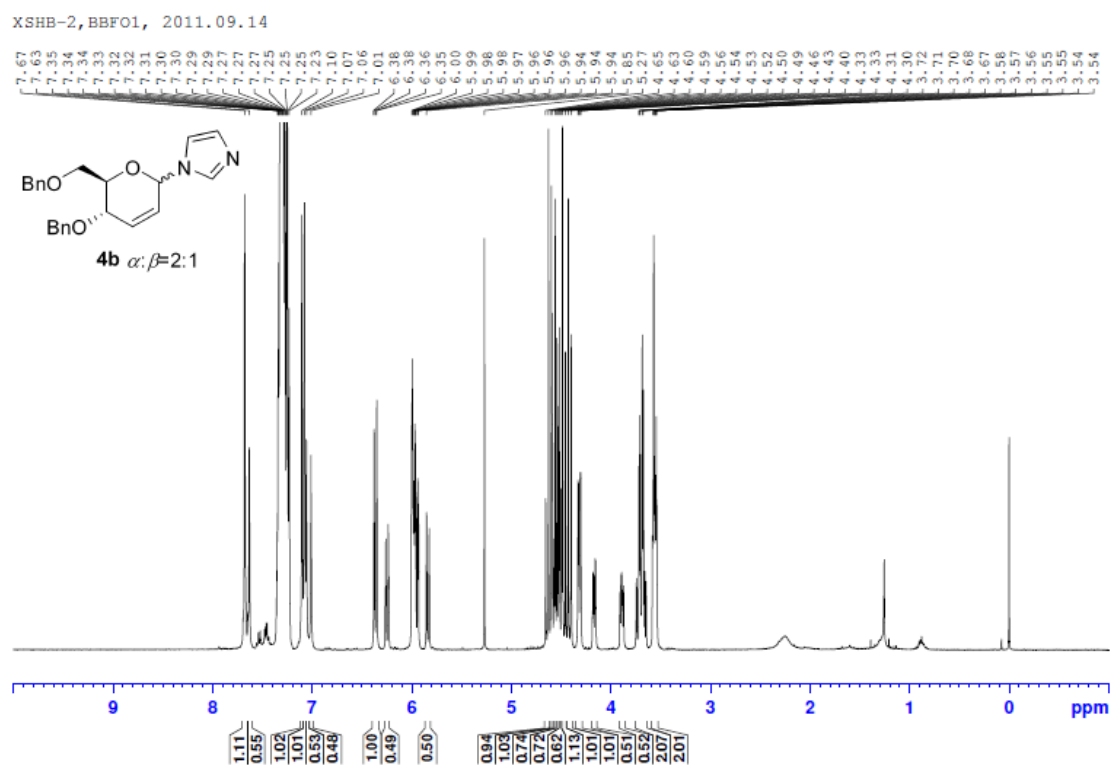

## <sup>1</sup>H NMR spectral of Crude 4b with Pd(PPh<sub>3</sub>)<sub>4</sub>

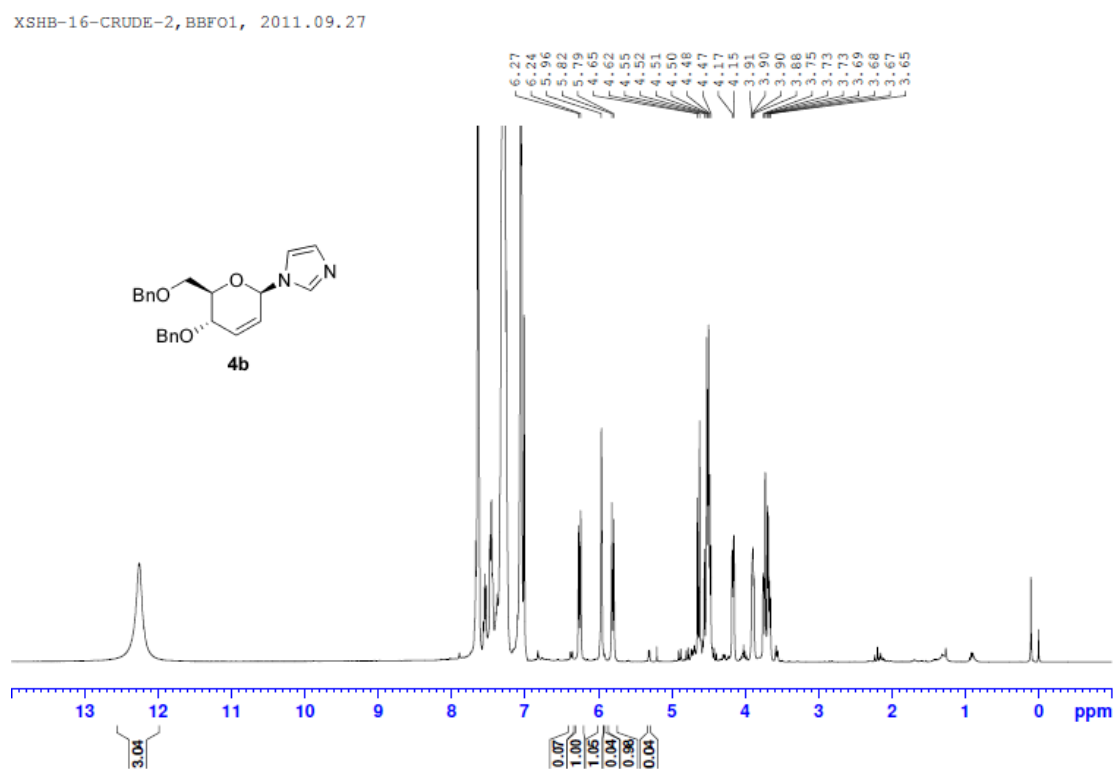

# <sup>1</sup>H NMR spectral of 4c without Pd(PPh<sub>3</sub>)<sub>4</sub>

XSHB-3, BBF01, 2011.09.14

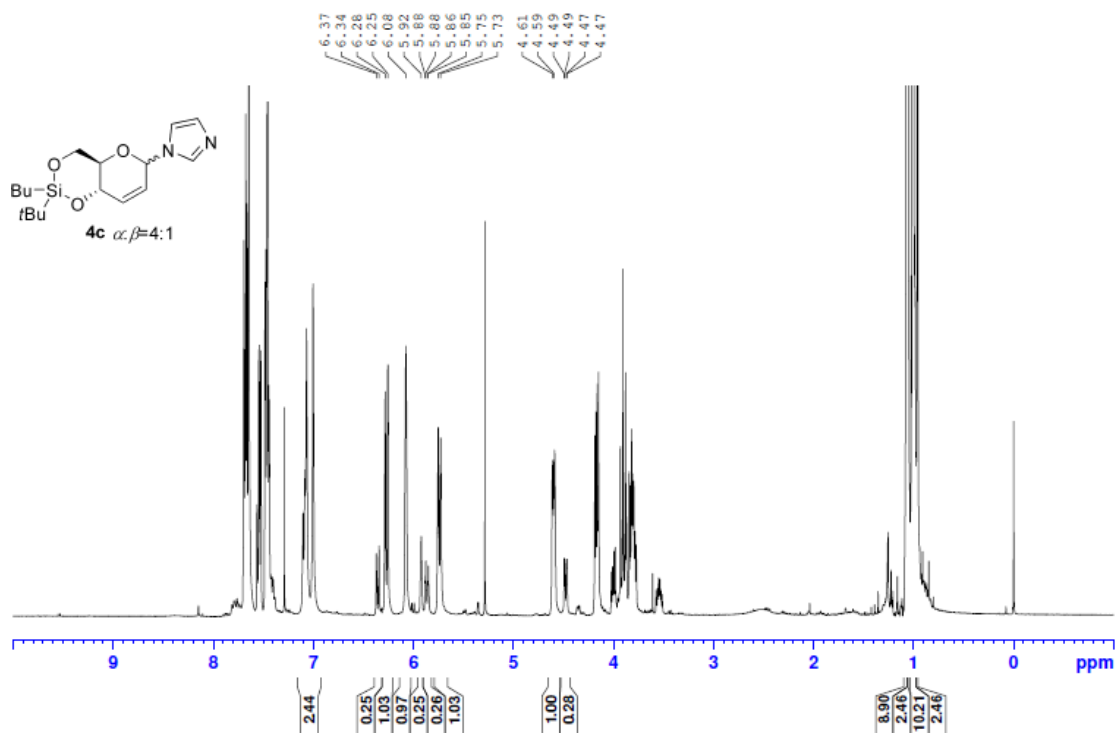

# <sup>1</sup>H NMR spectral of Crude 4c with Pd(PPh<sub>3</sub>)<sub>4</sub>

XSHB-9-CRUDE, BBF01, 2011.09.22

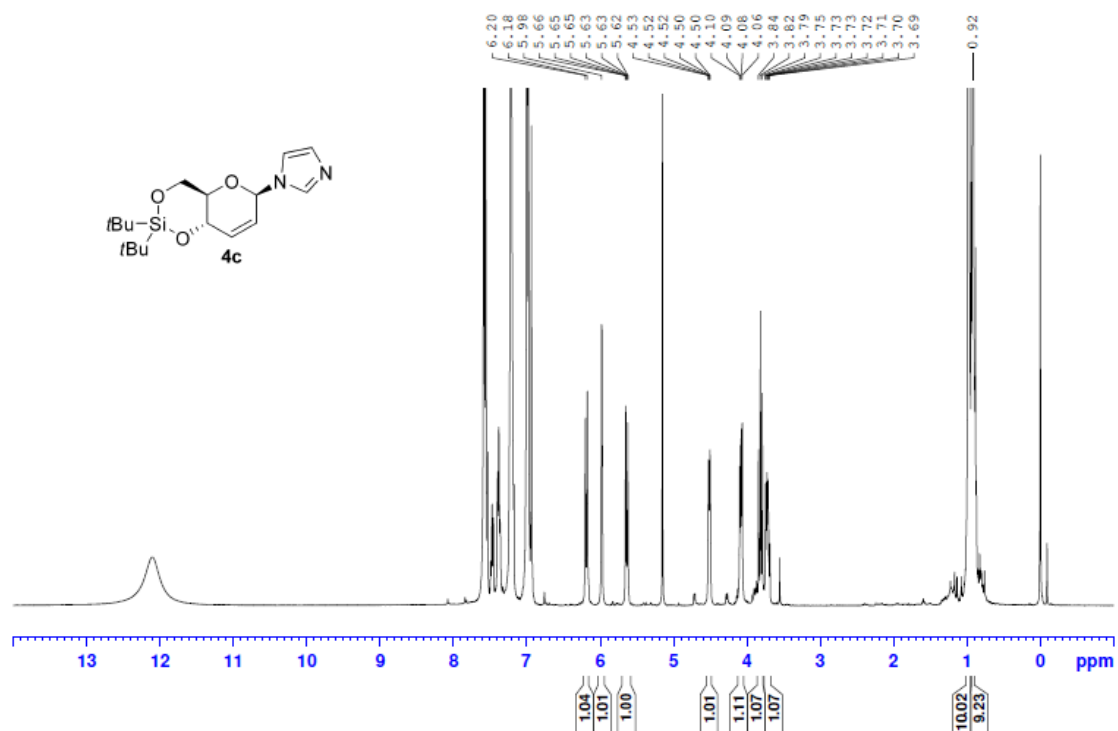

# <sup>1</sup>H NMR spectral of 4d without Pd(PPh<sub>3</sub>)<sub>4</sub>

XSHB-7,BBF01, 2011.09.14

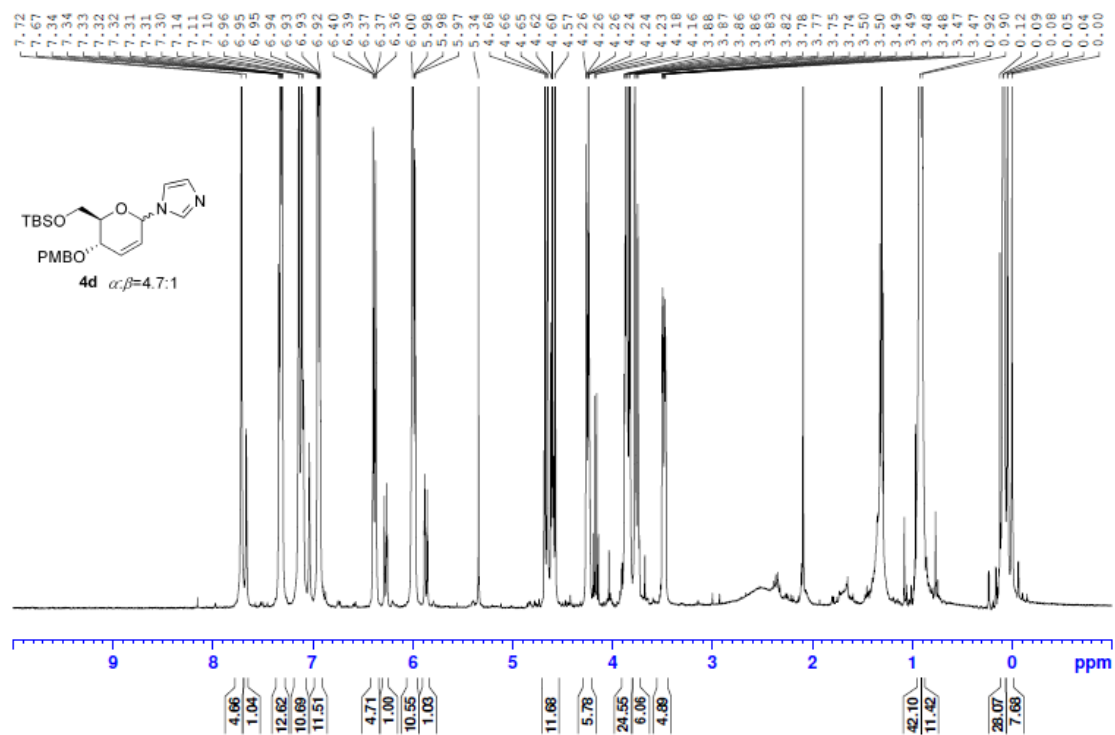

# <sup>1</sup>H NMR spectral of Crude 4d with Pd(PPh<sub>3</sub>)<sub>4</sub>

XSHB-17-CRUDE,BBF01, 2011.09.27

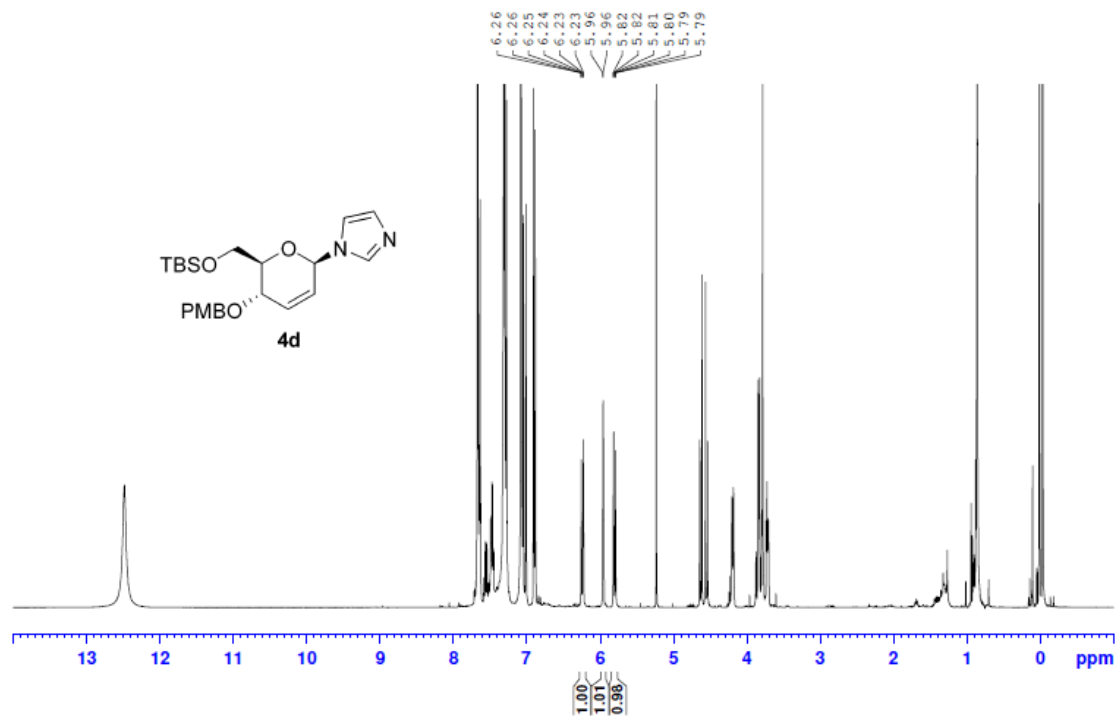

# Spectral data for 4a-4p and 6 with palladium catalyst

XSHB-PMP-glucal-imidazole, BBFO1, 2011.09.21

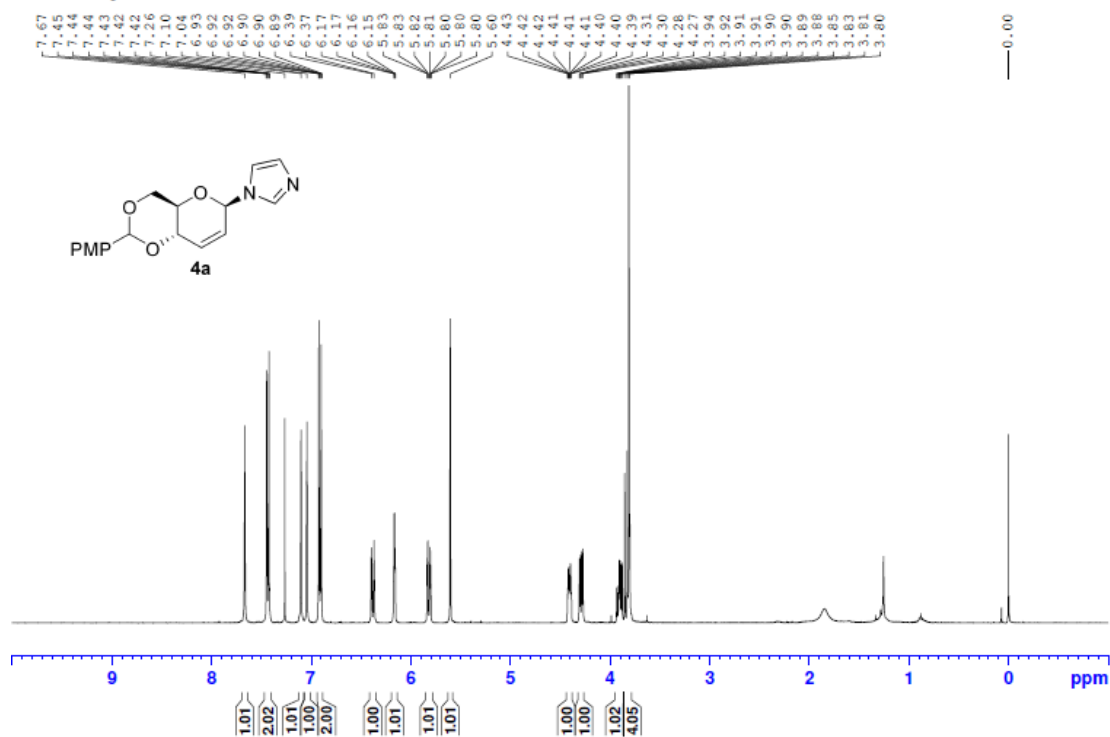

XSHB-PMP-glucal-imidazole-C, BBFO1, 2011.09.21

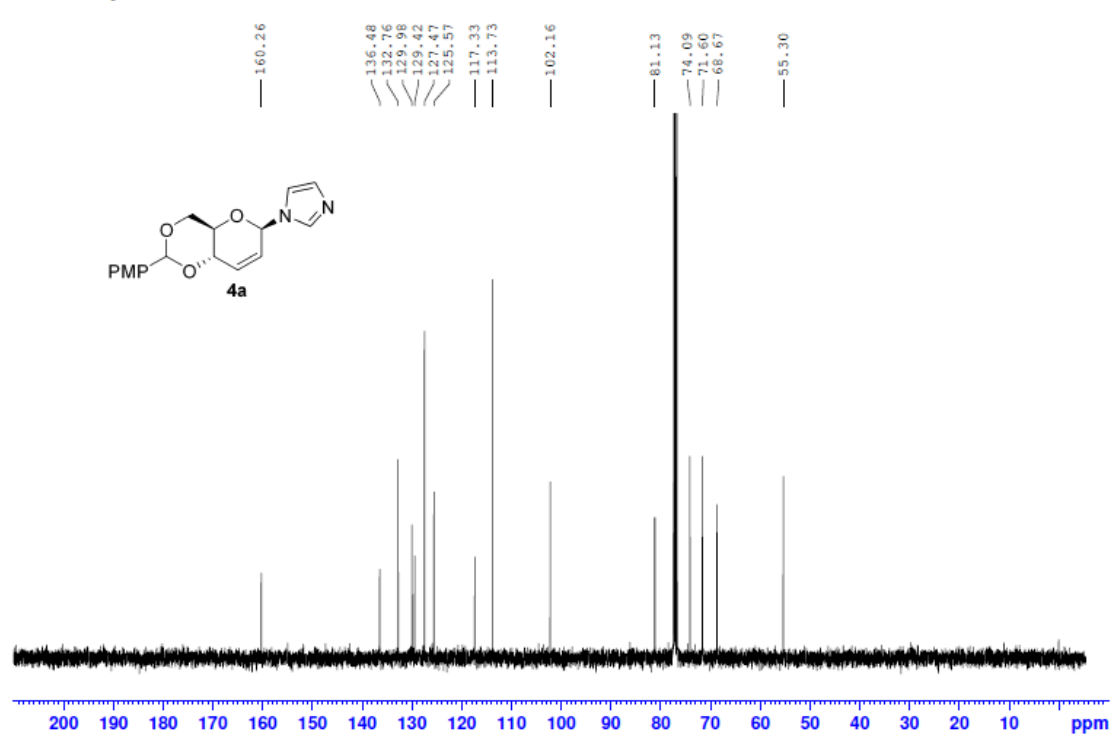

XSHB-16-3, BBF01, 2011.09.30

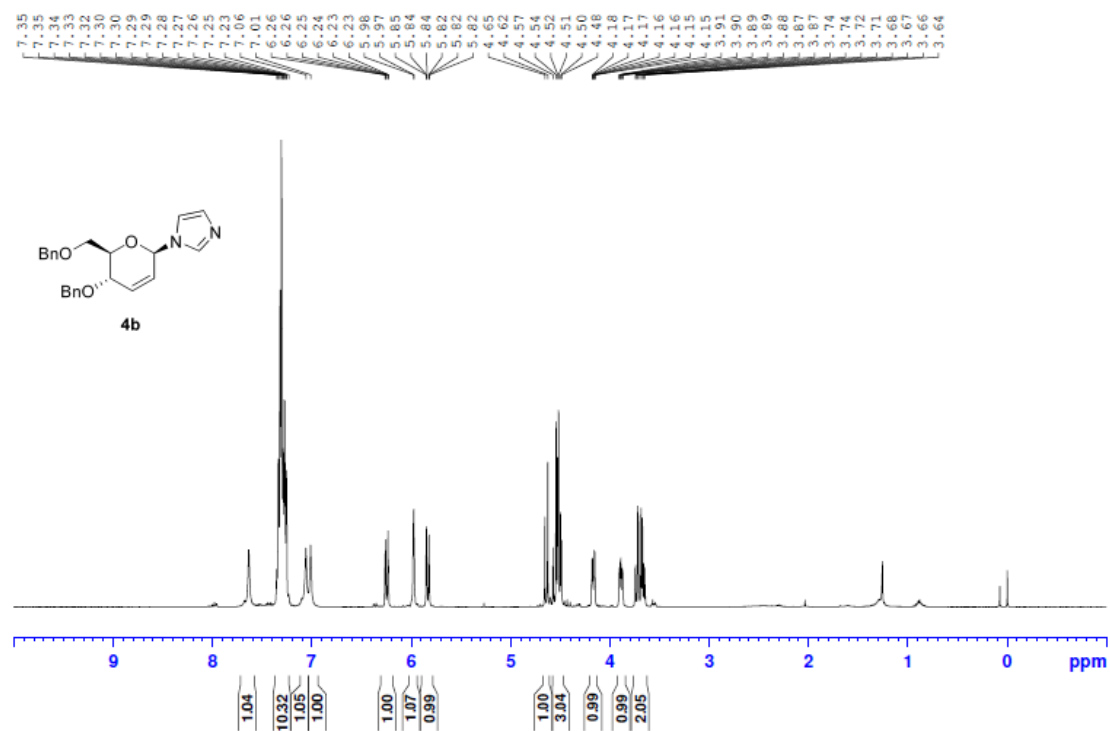

XSHB-16-3-C

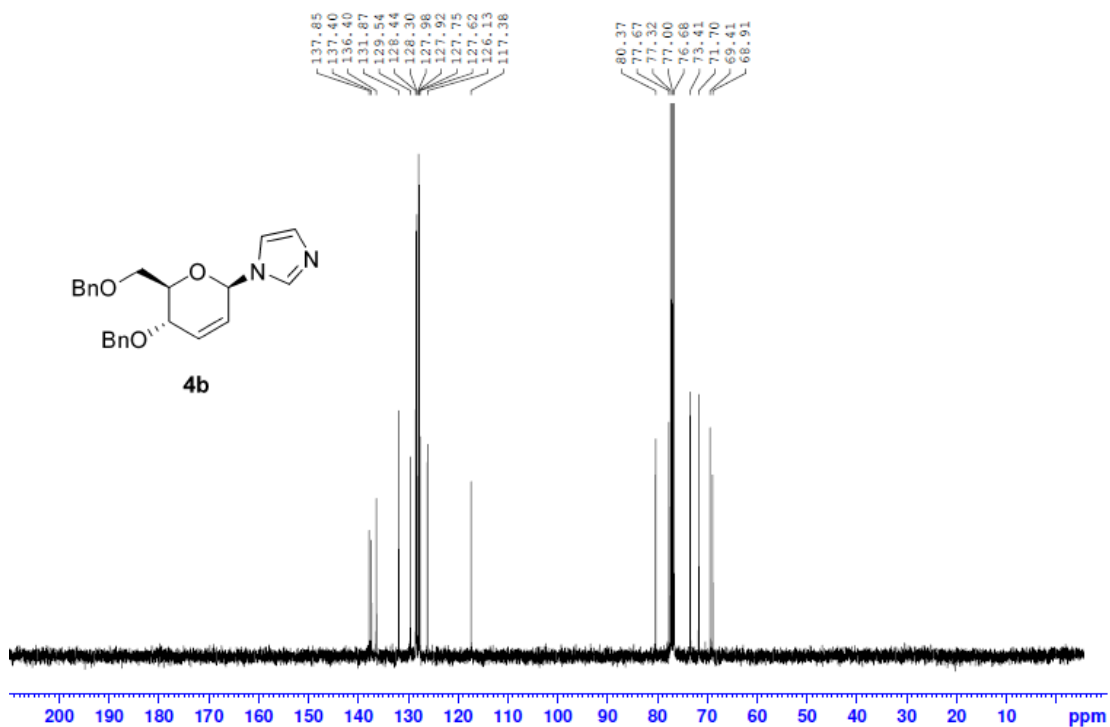



XSHB-12-Si-CDI, BBFO1, 2011.09.23

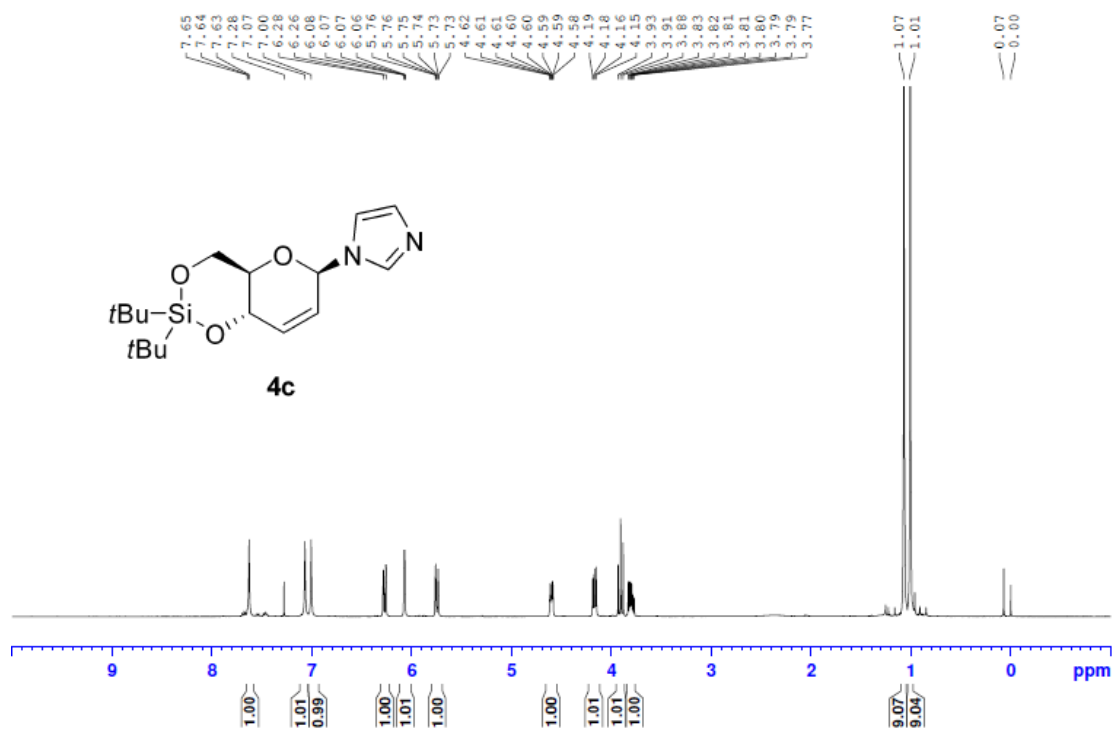

XSHB-12-Si-CDI-C, BBFO1, 2011.09.23

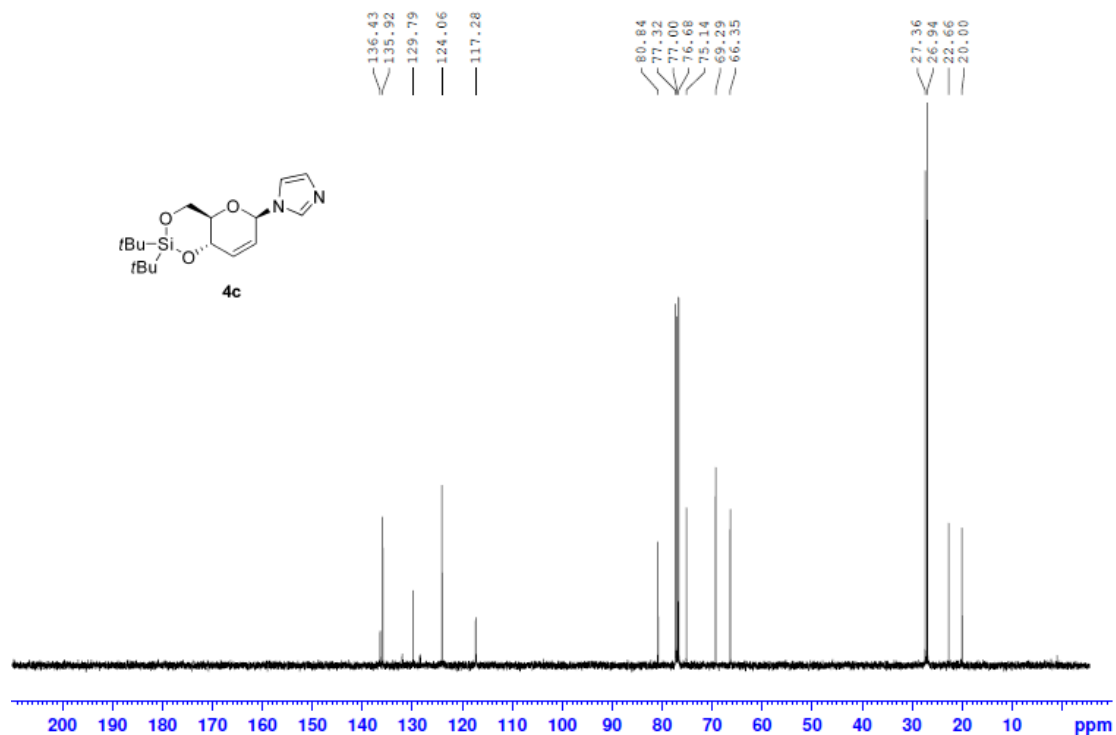

XSHB-17-1, 400 BBFO1, 1H, CDCl3

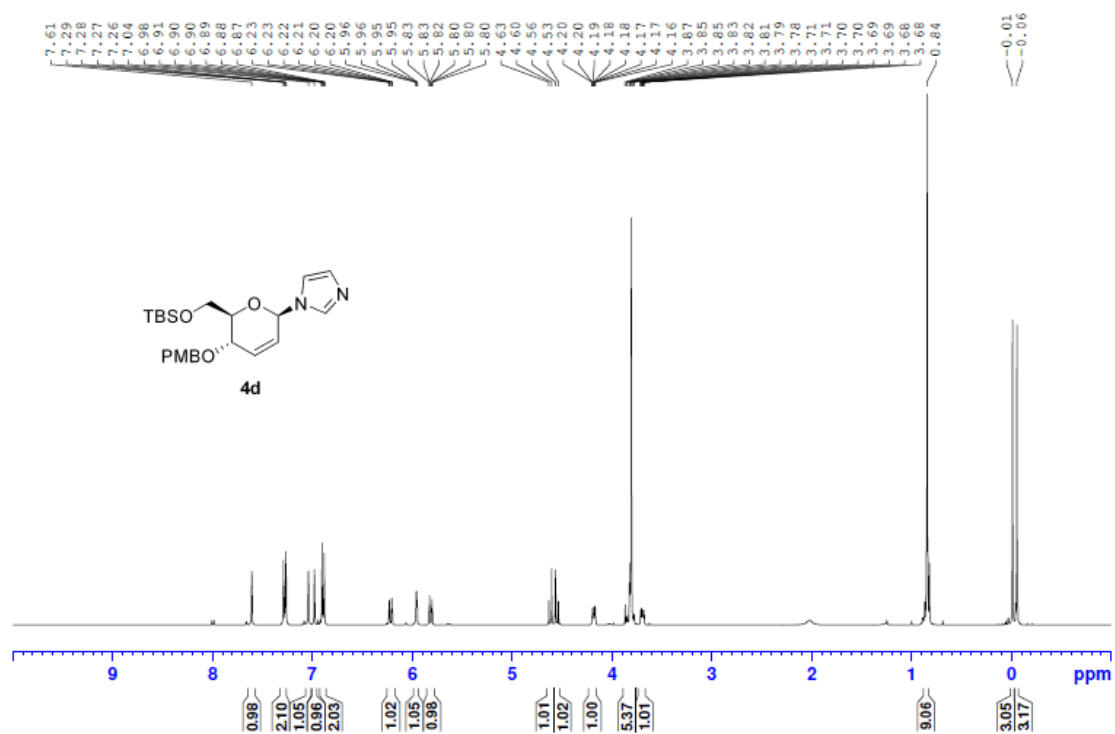

XSHB-17-1-C, 400 BBFO1, 1H, CDCl3

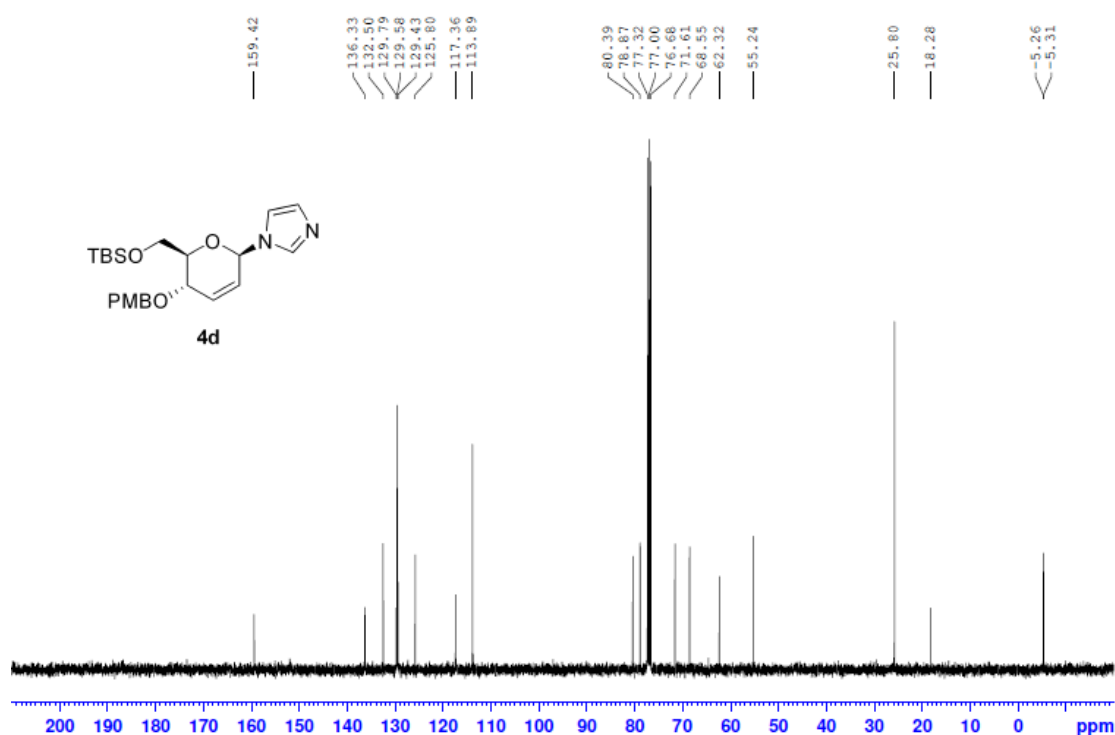

XSHB-18, BBF01, 2011.09.28

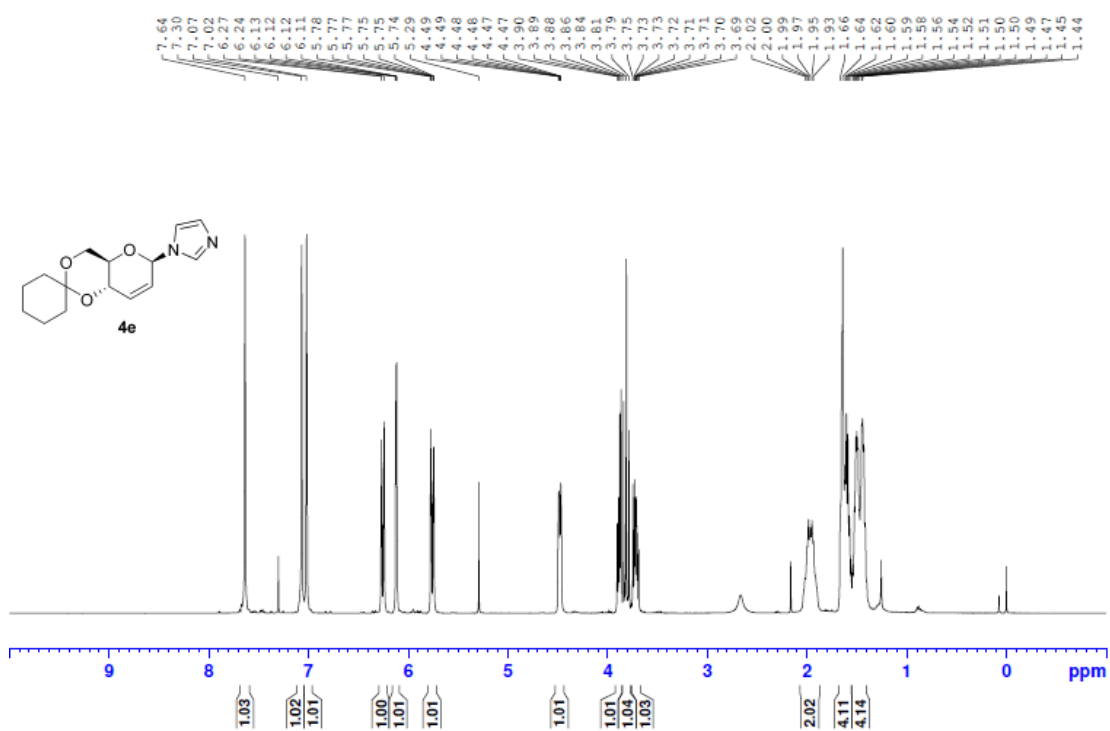

XSHB-18-C, BBF01, 2011.09.28

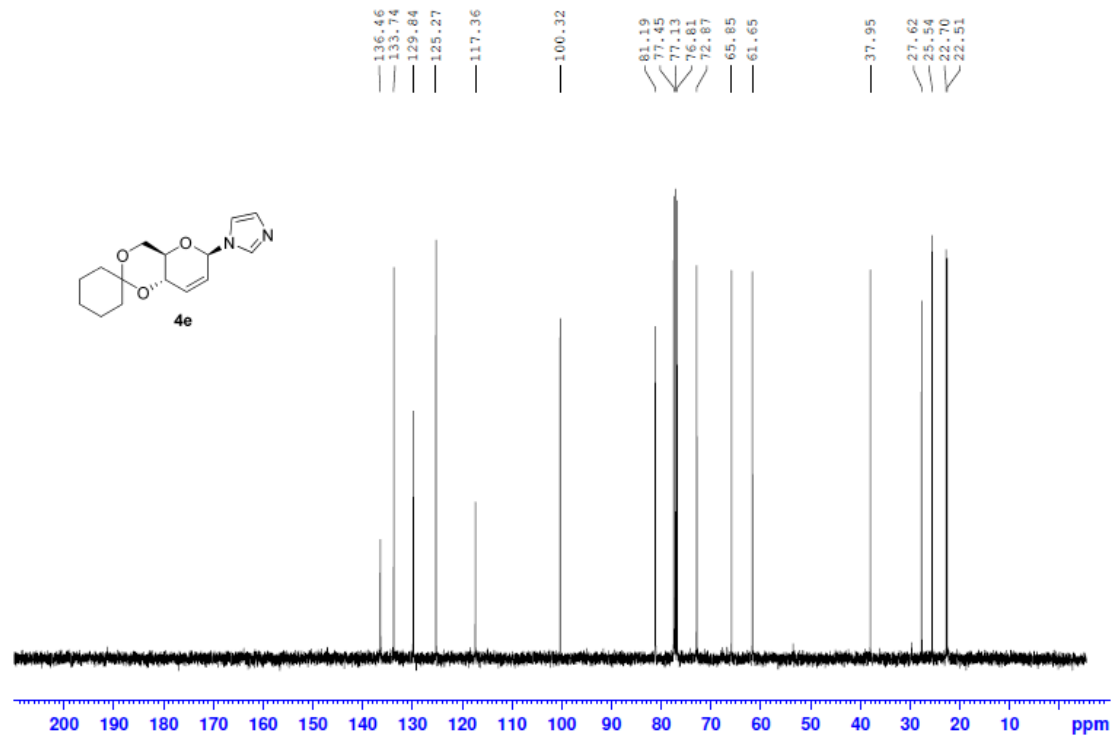



XSHB-25-2, 400MHz, BBFO1, 20130104

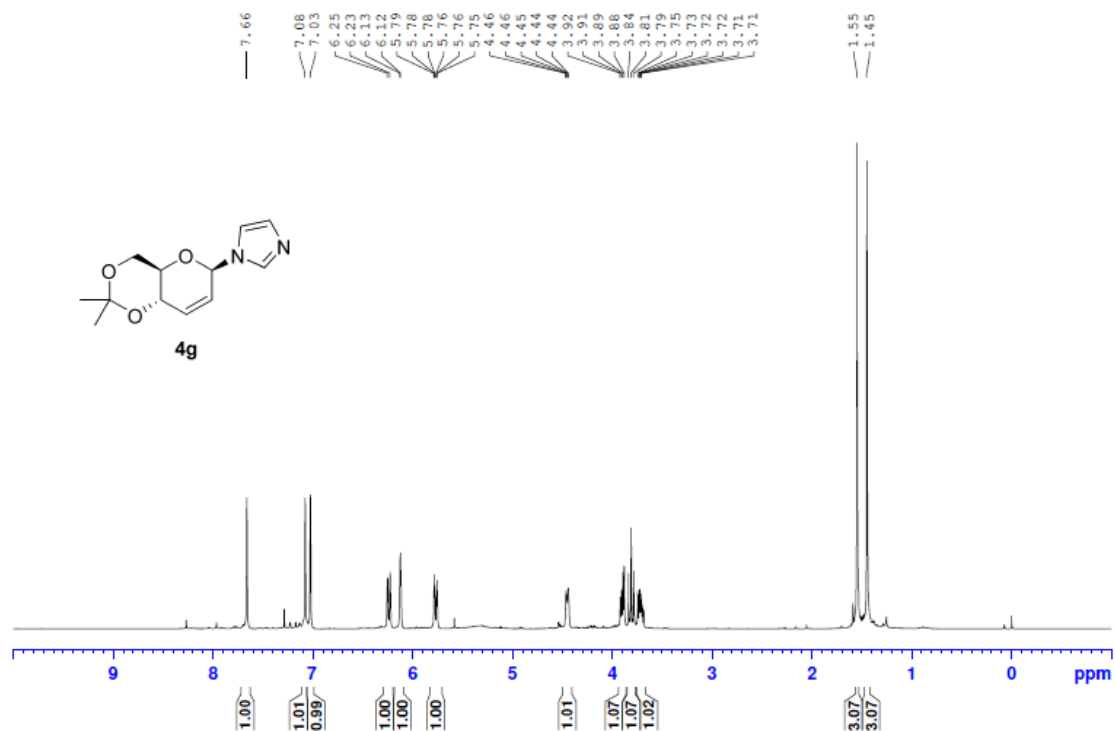

XSHB-25-2-C, 400MHz, BBFO1, 20130104

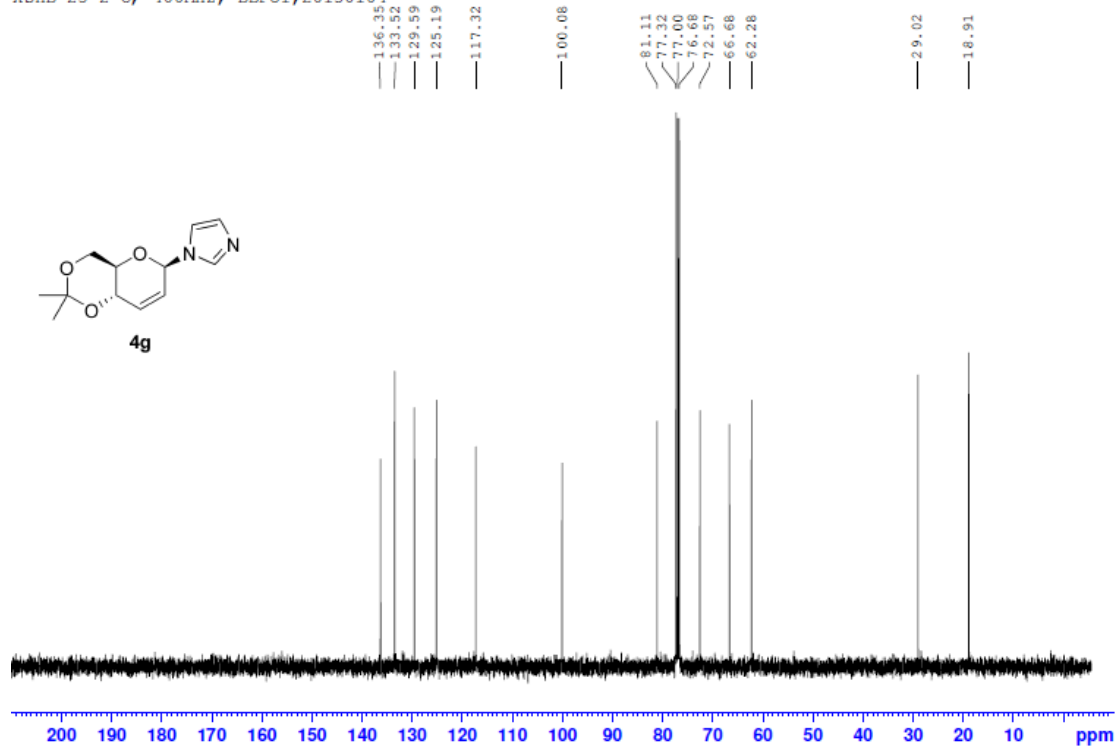

XSHB-65, 1H, BBOF01, 400Hz, CDC13

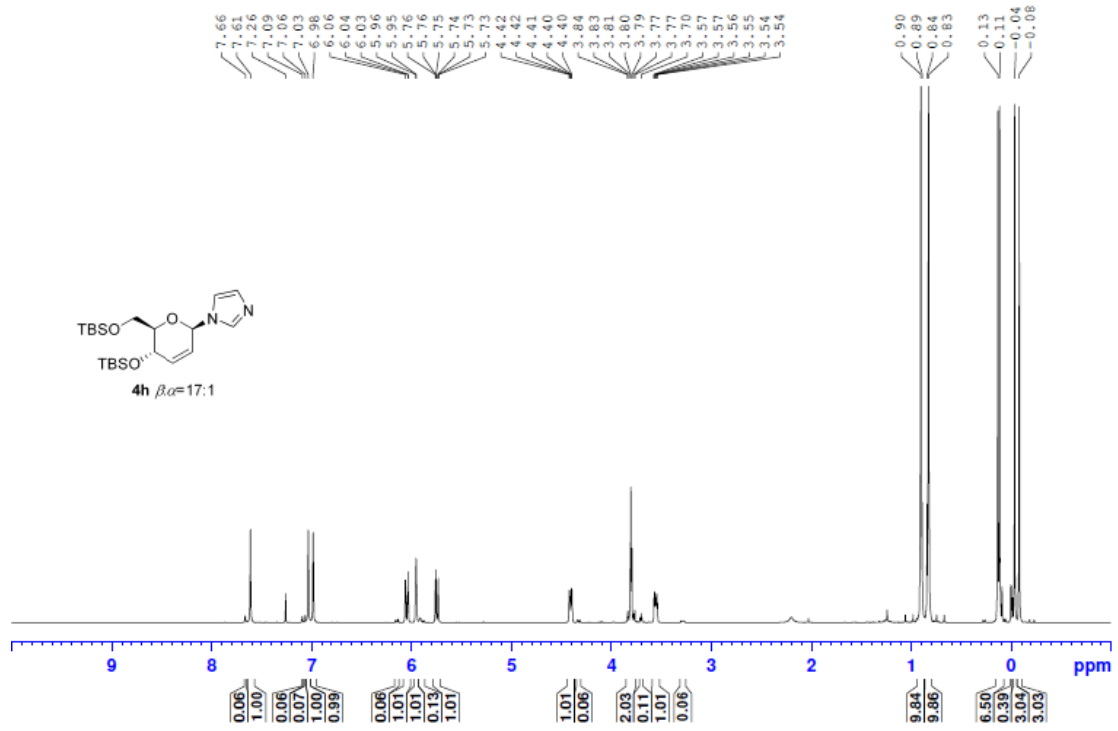

XSHB-65-C, 1H, BBOF01, 400Hz, CDC13

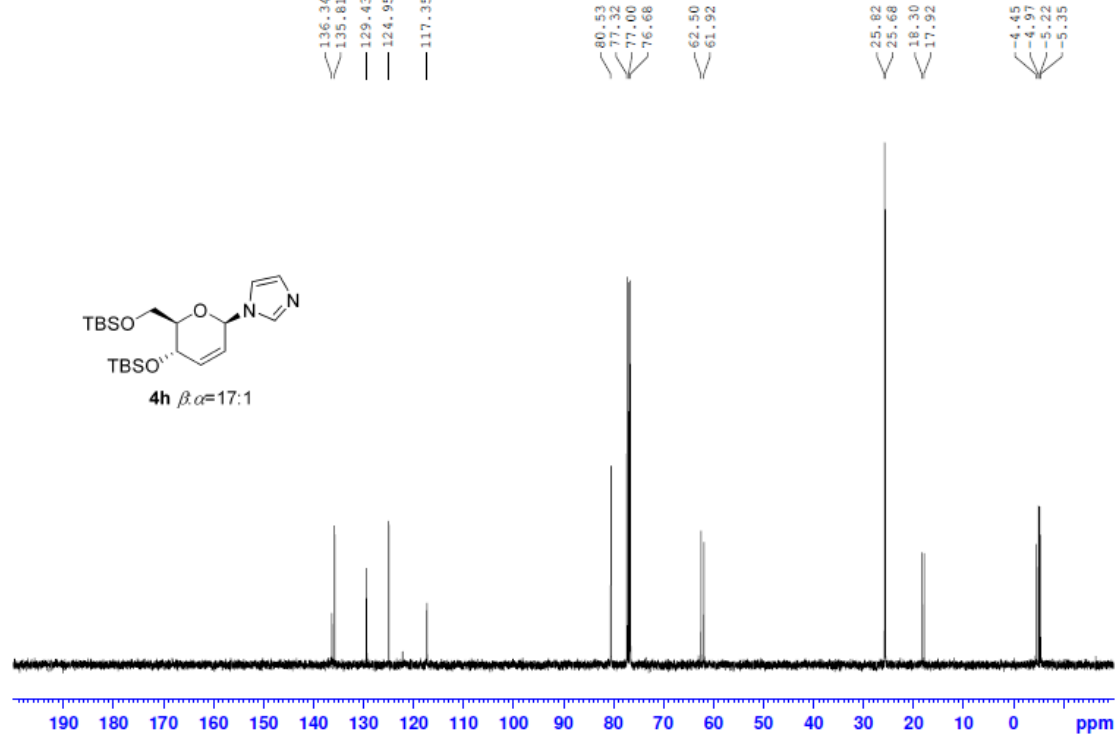

XSHB-35, 400 BBFO1, CDCl3

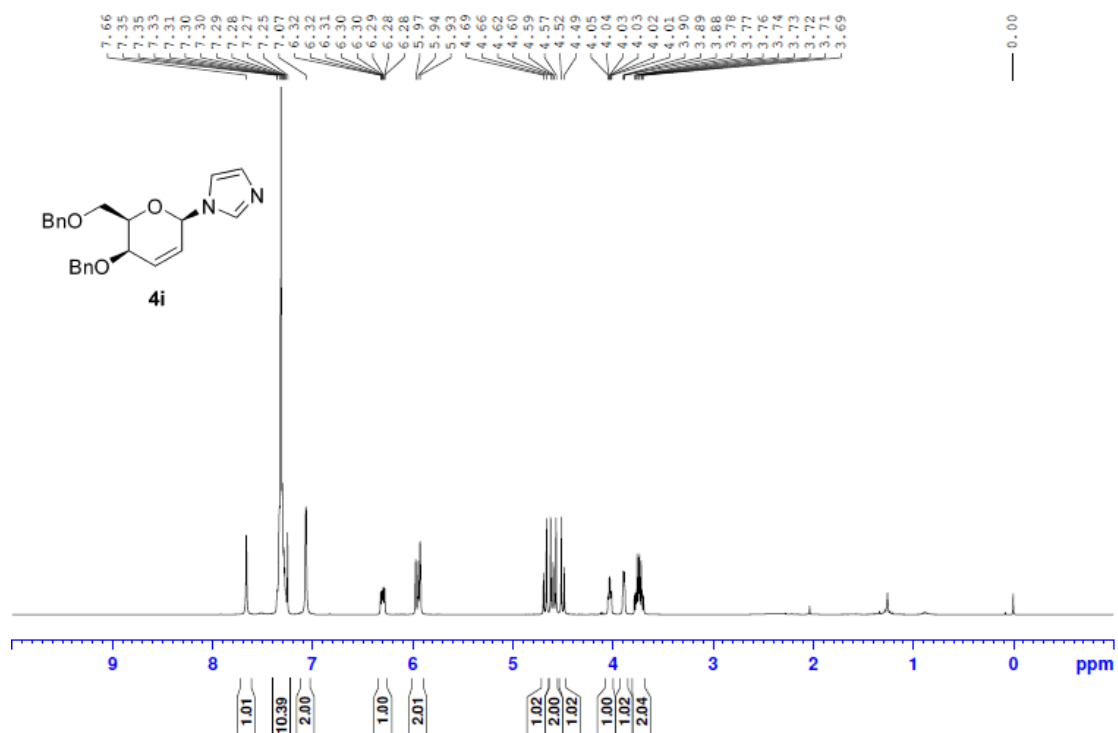

XSHB-35-C, 400 BBFO1, CDCl3

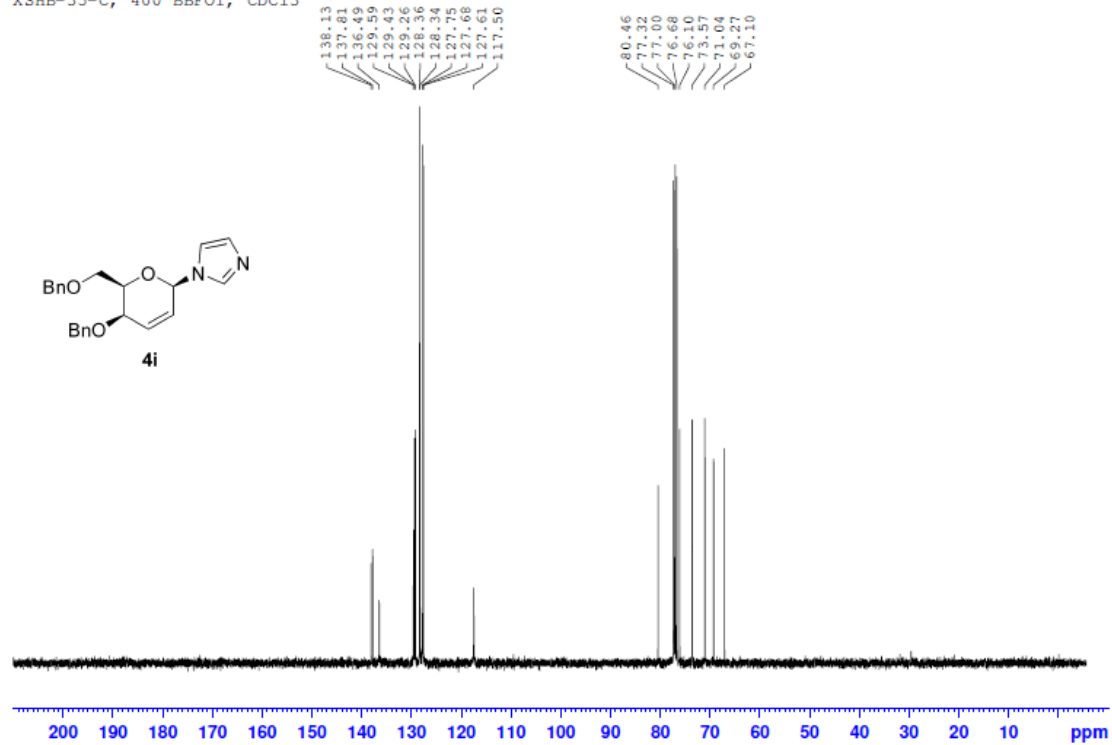

XSHB-64, 1H, BBOF01, 400Hz, CDCl3

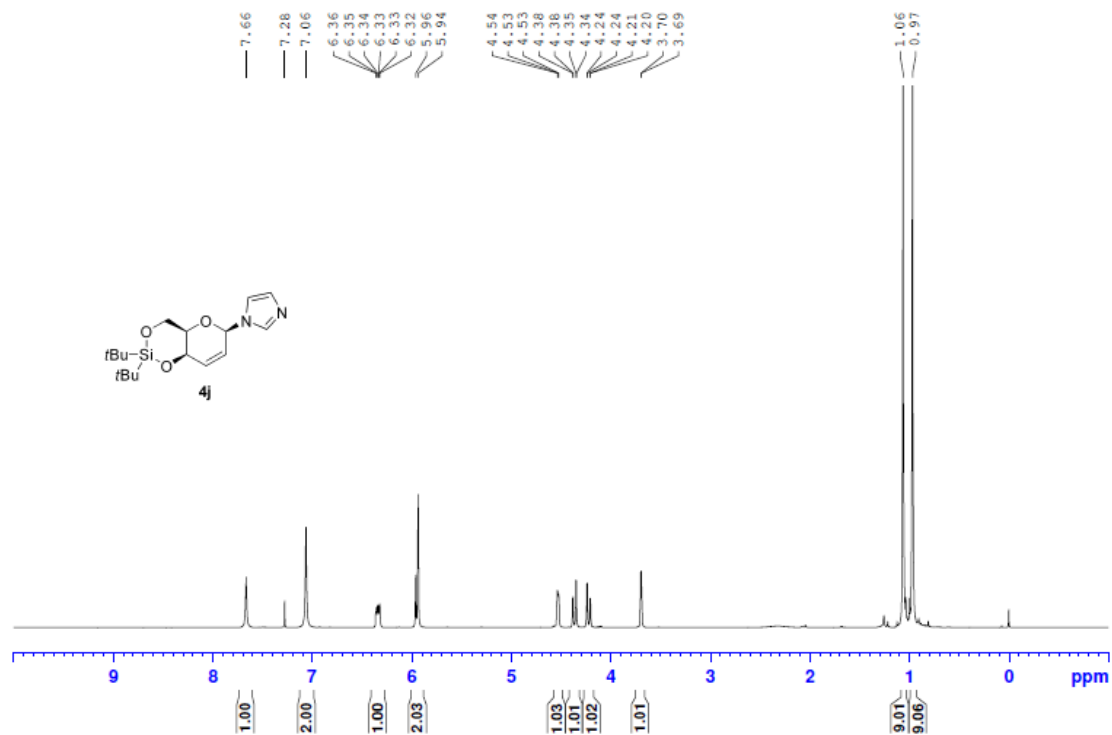

XSHB-64-C, 1H, BBOF01, 400Hz, CDCl3

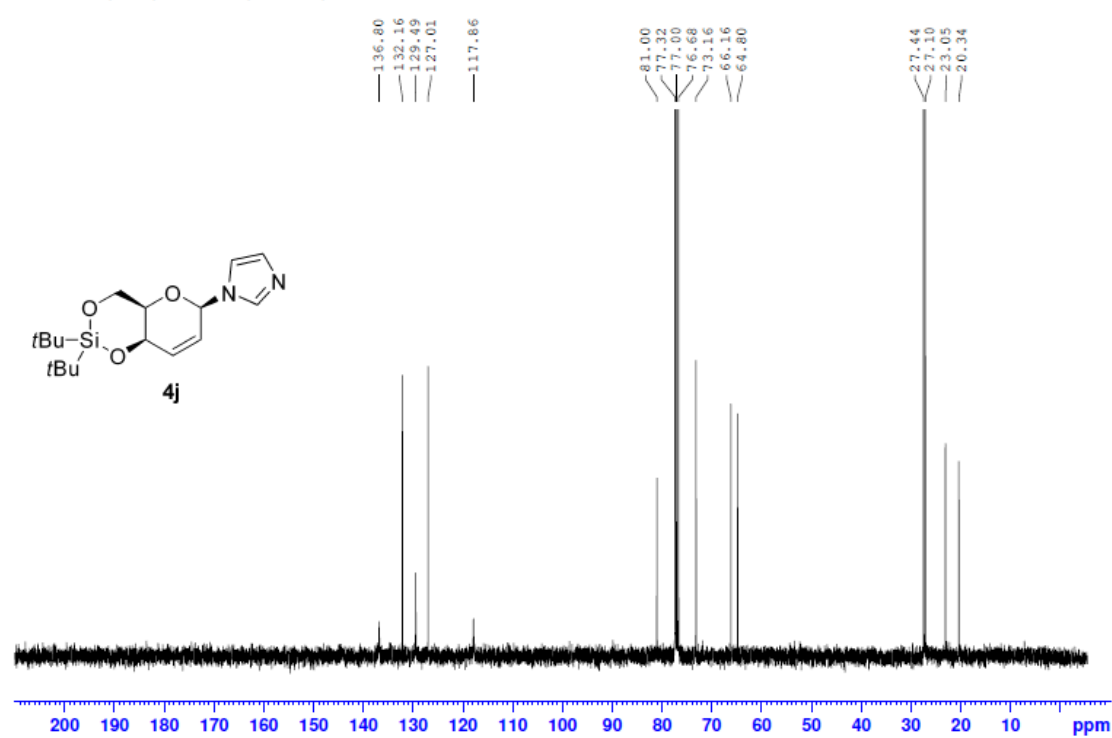



XSHB-19-2, 400 BBFO1, 1H, CDC13

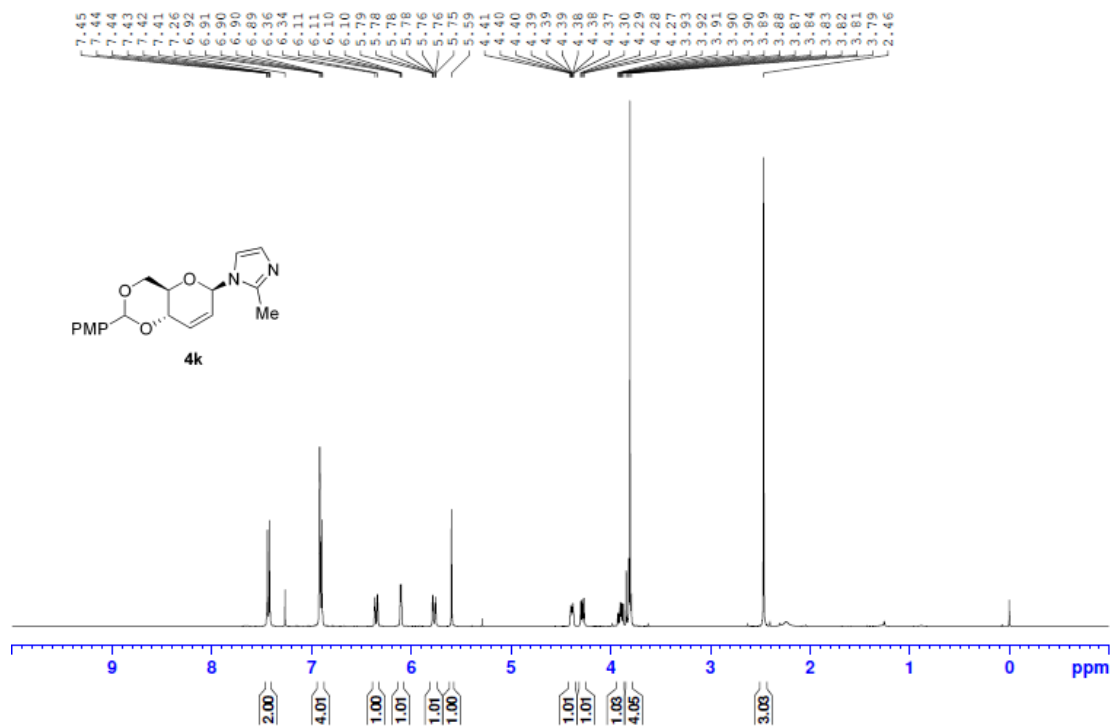

XSHB-19-C, 400 BBFO1, CDC13

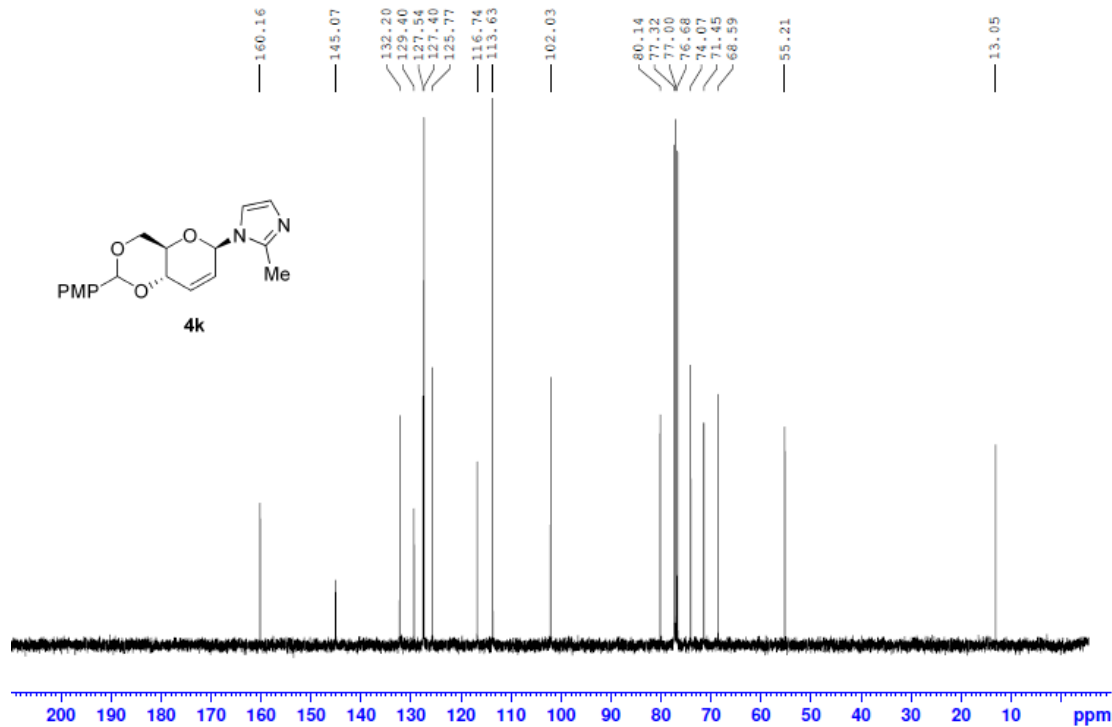

XSH-B-48-GLUCAL-prd, BBFO1

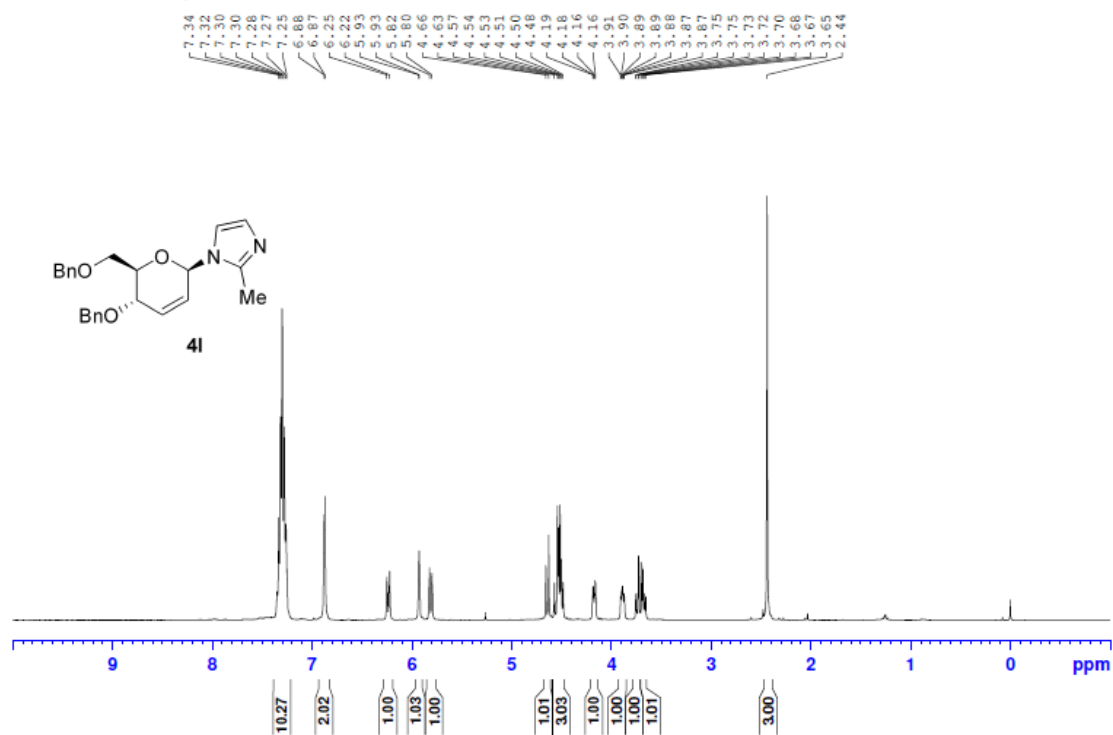

XSH-B-48-GLUCAL-prd-c, BBFO1

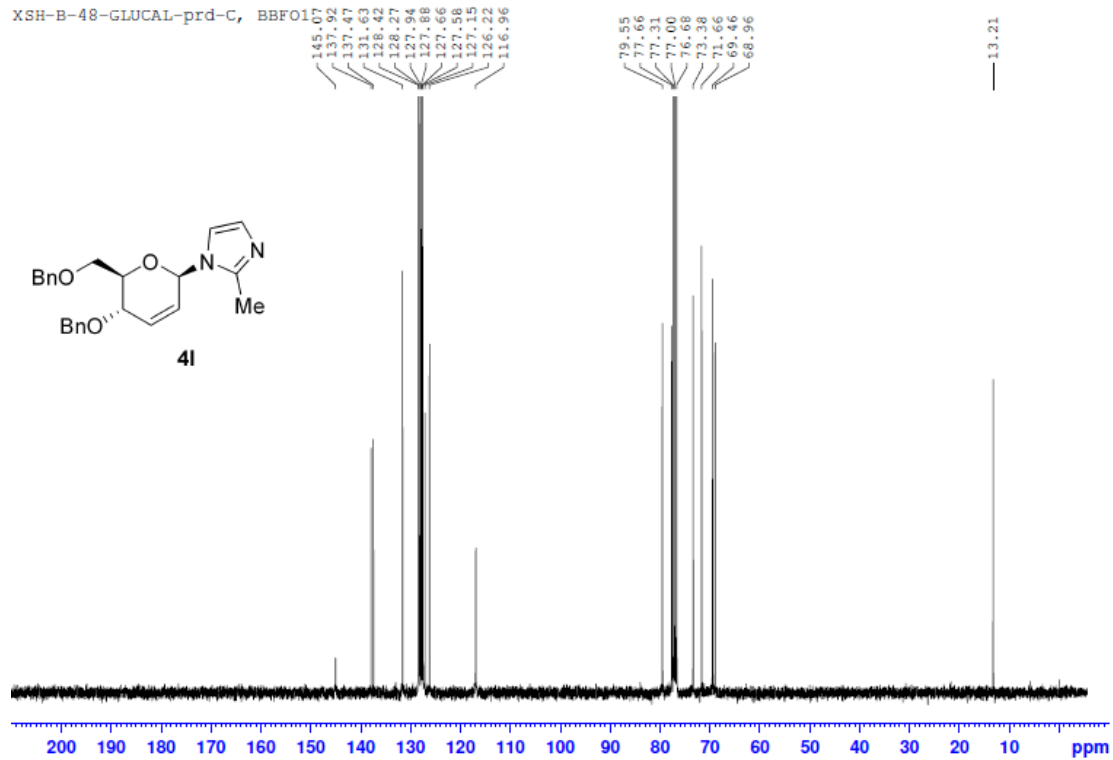

XSH-B-49-GALACTAL-PRD-2, BBFO1

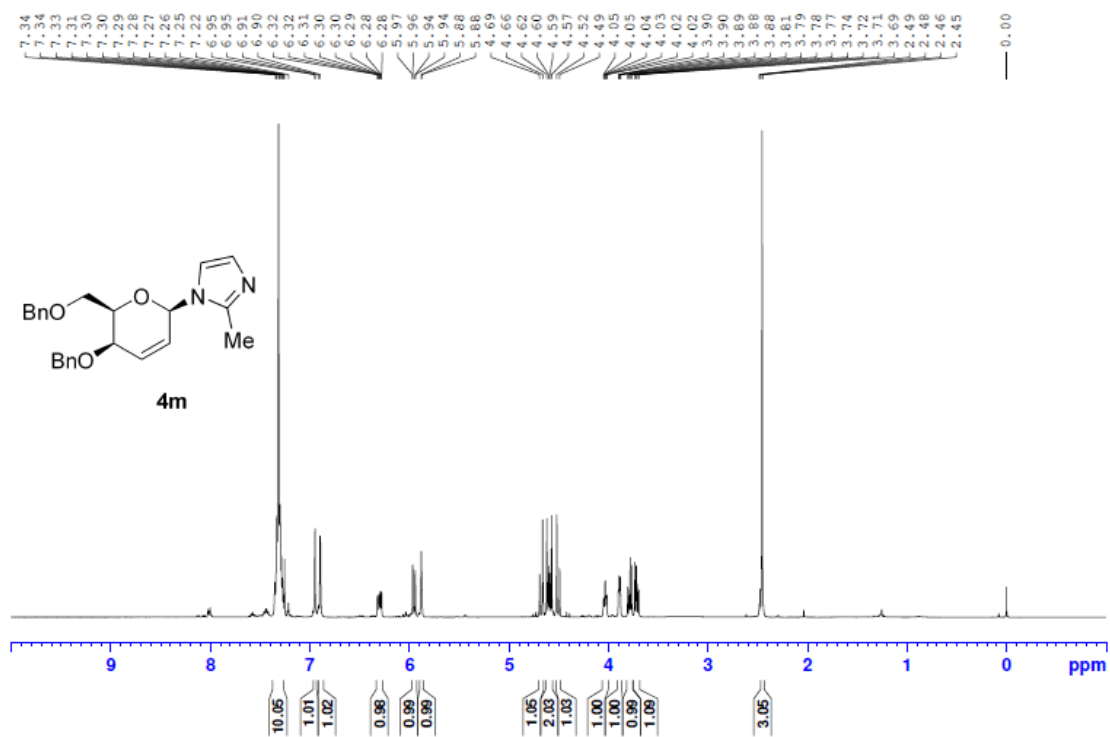

XSH-B-49-GALACTAL-PRD-2-C, BBFO1

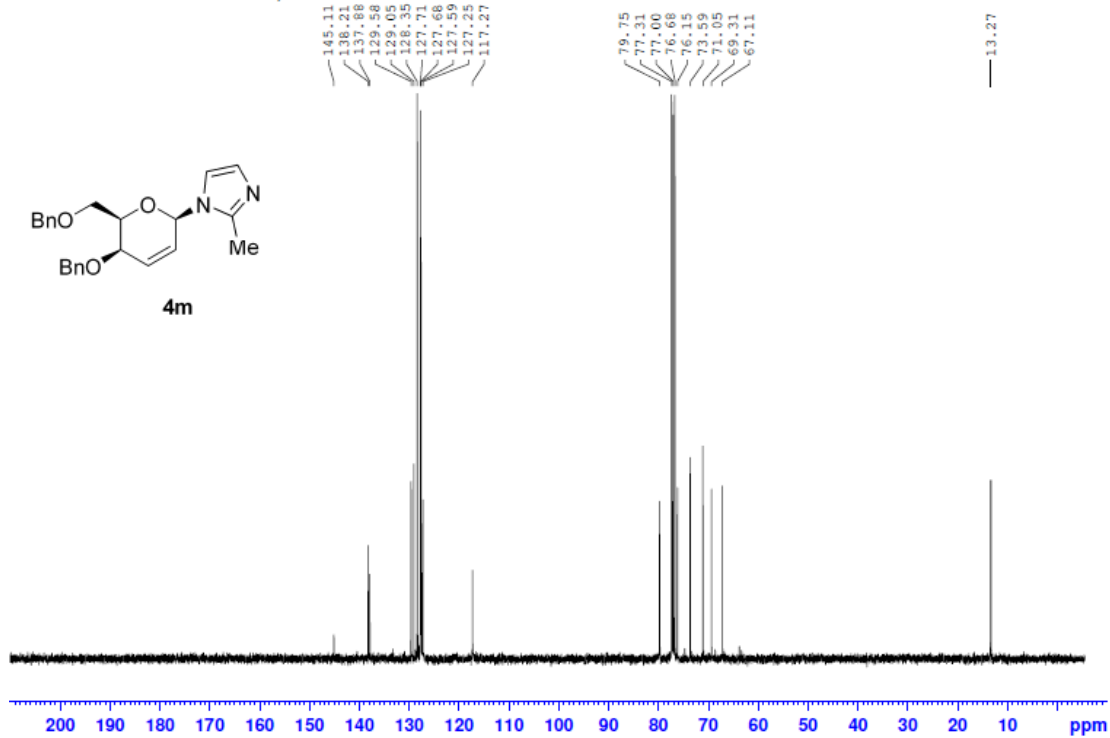

XSH-B-67-1, 1H, BBOF01, 400Hz, CDCl3

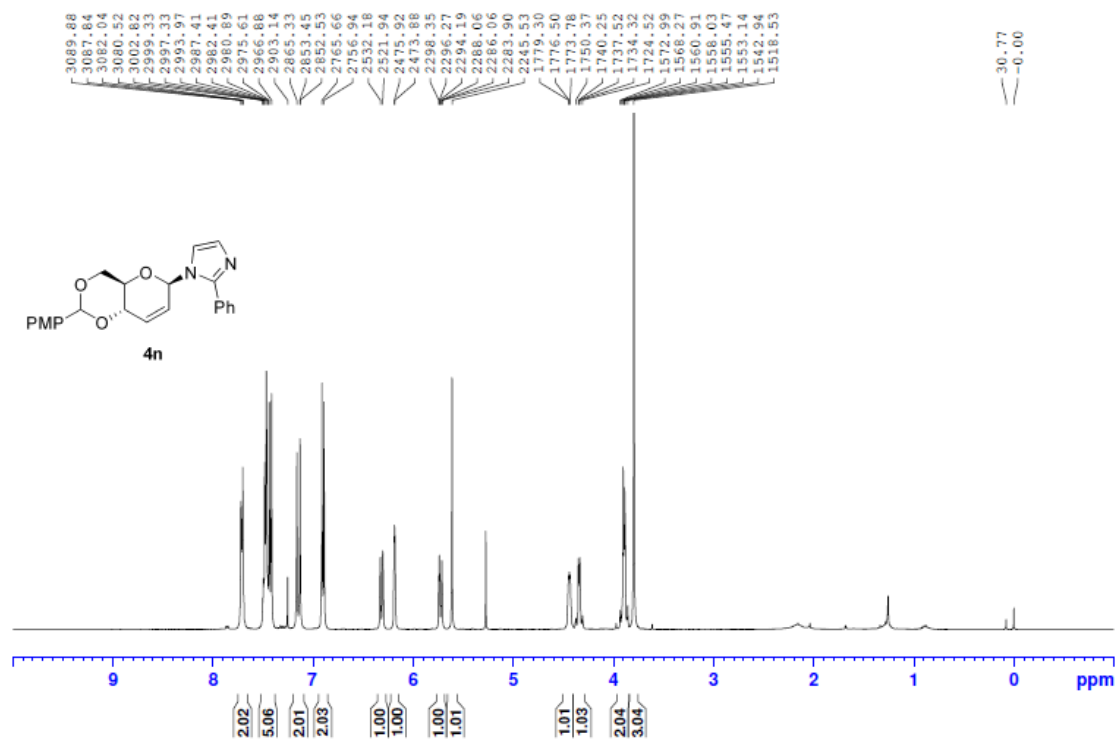

XSH-B-67-1-C, 1H, BBOF01, 400Hz, CDCl3

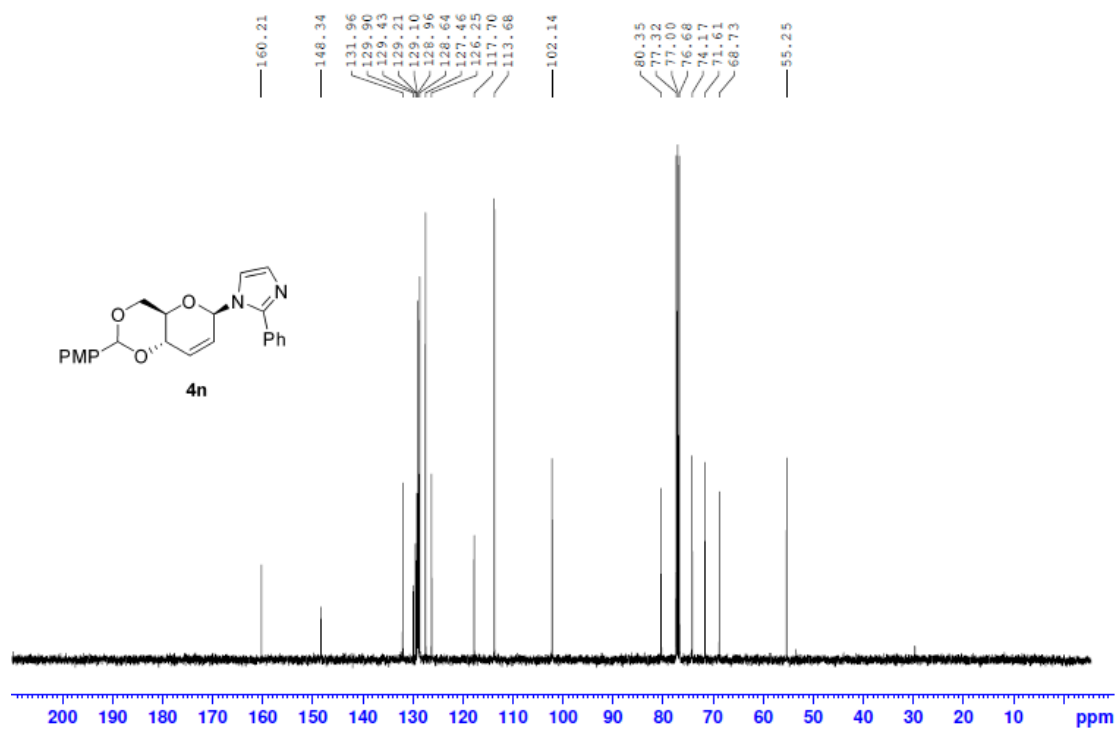

XSHD-40-2,4-diMe-2, 400MHz, CDC13, 20131126

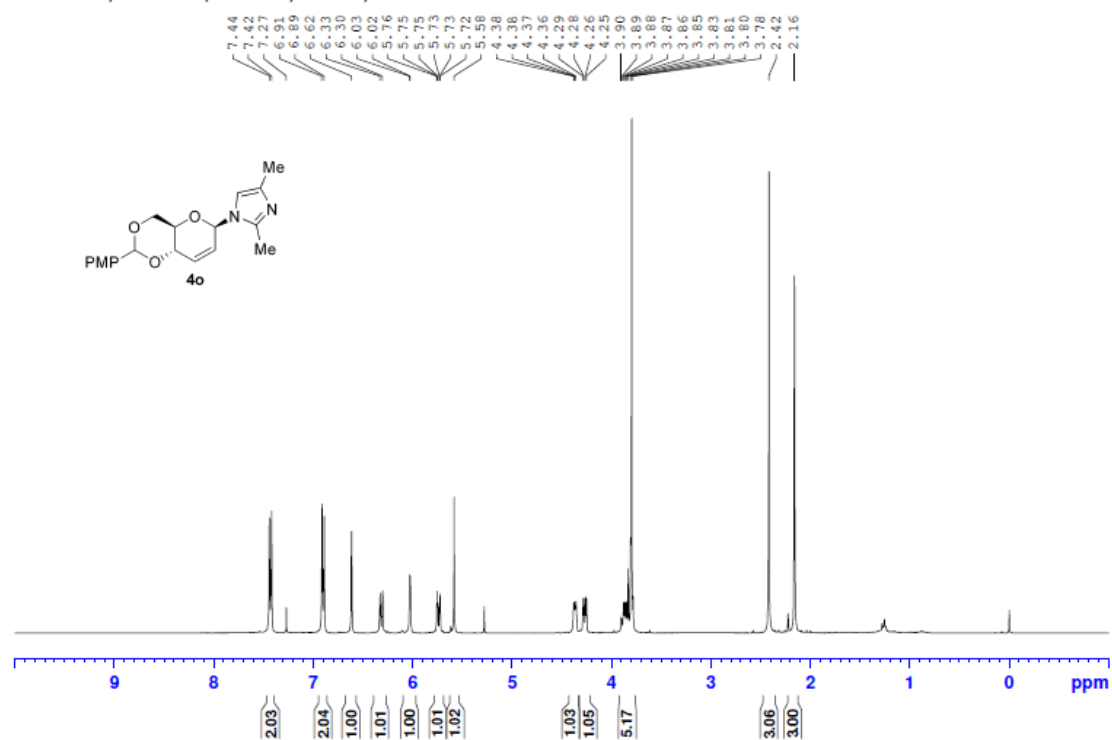

XSHD-40-2,4-diMe-2-c, 400MHz, CDC13, 20131126

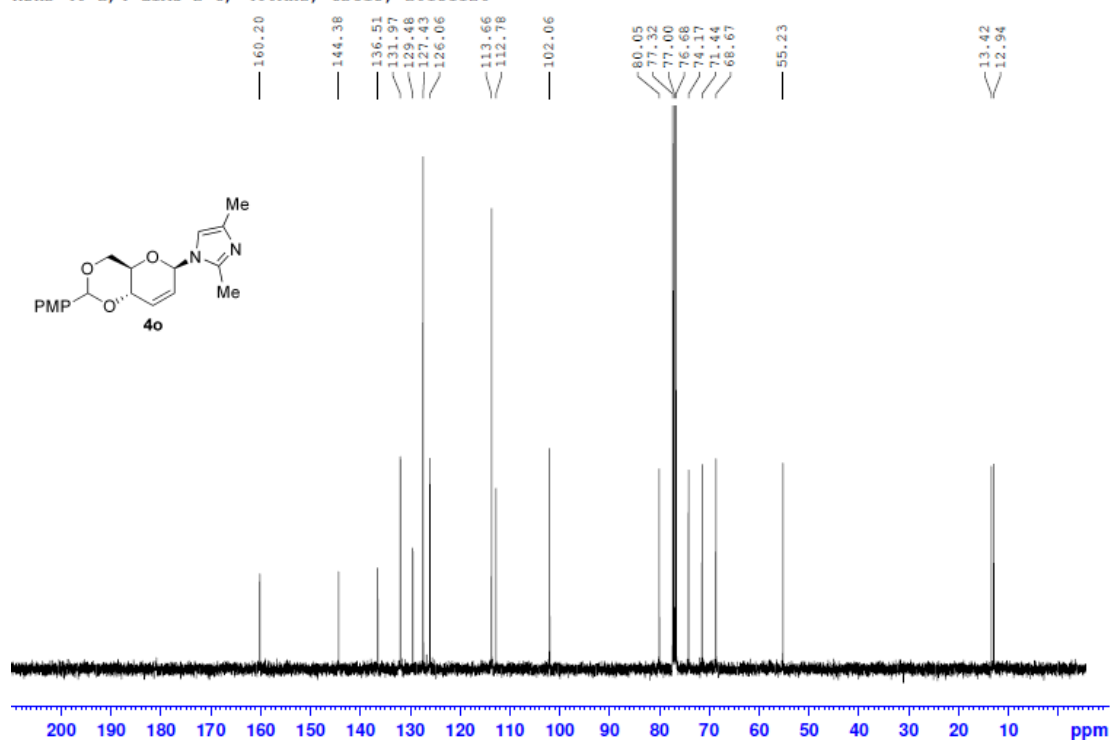

XSHD-40-4,5-diPh, 400MHz, CDCl3, 20131125

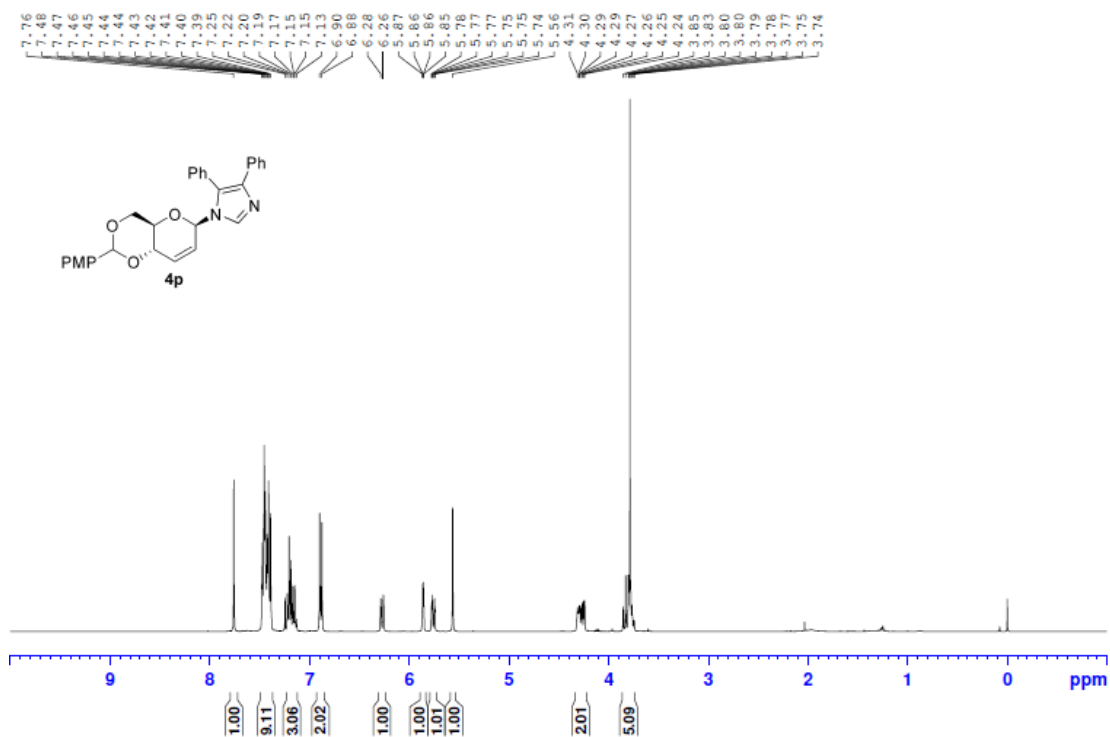

XSHD-40-4,5-diPh-C, 400MHz, CDCl3, 20131125

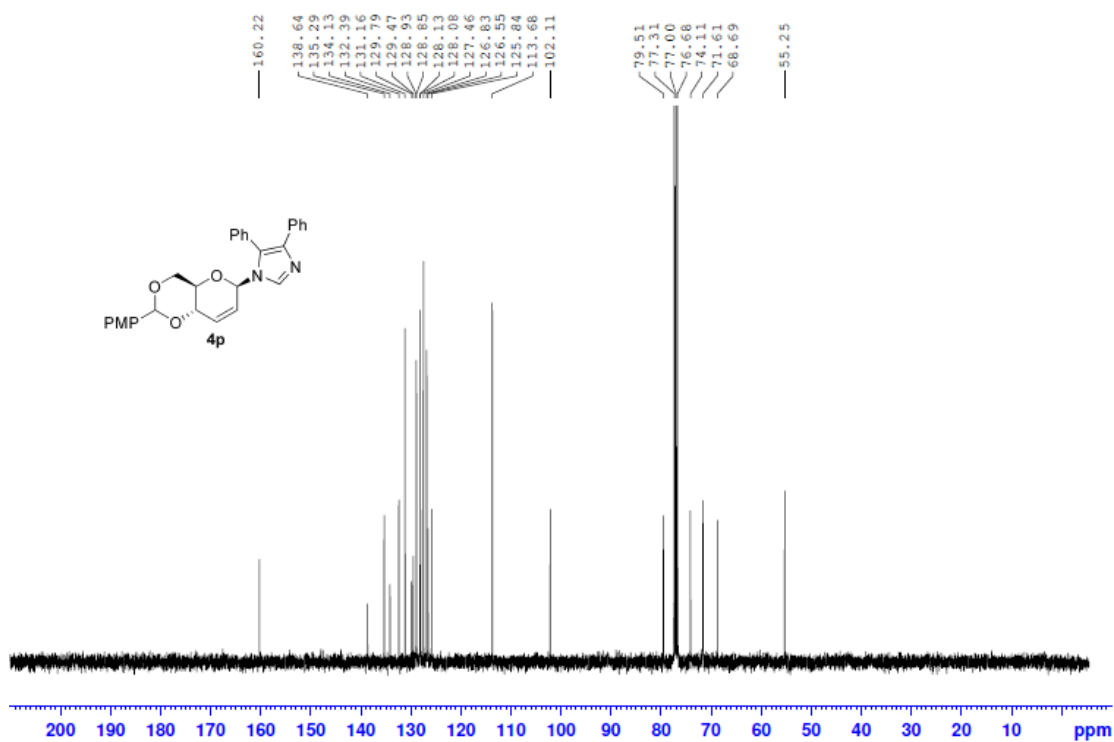

XSHC-76-300813-BBF01

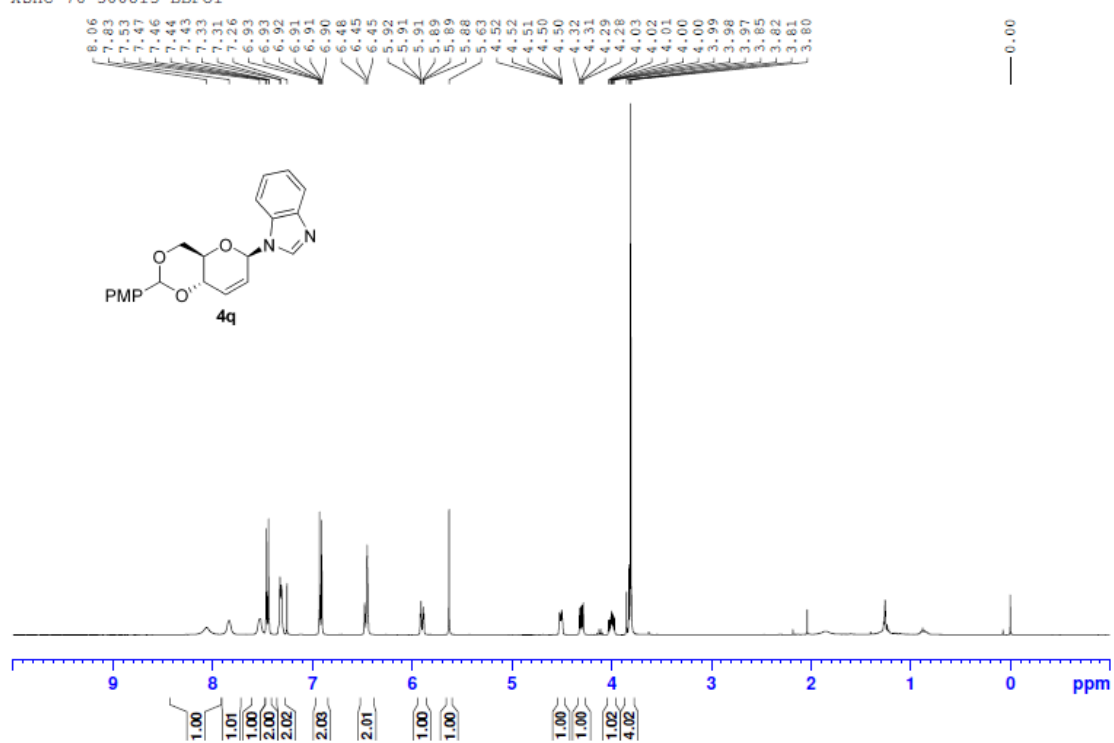

XSHC-76-C-300813-BBF01

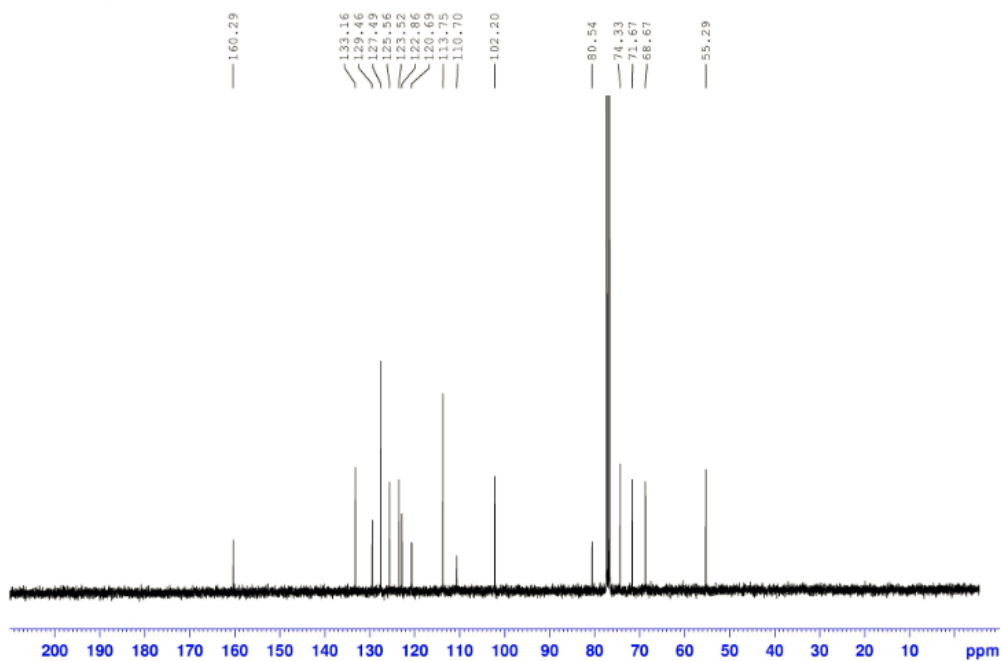

XSHC-77-300813-BBF01

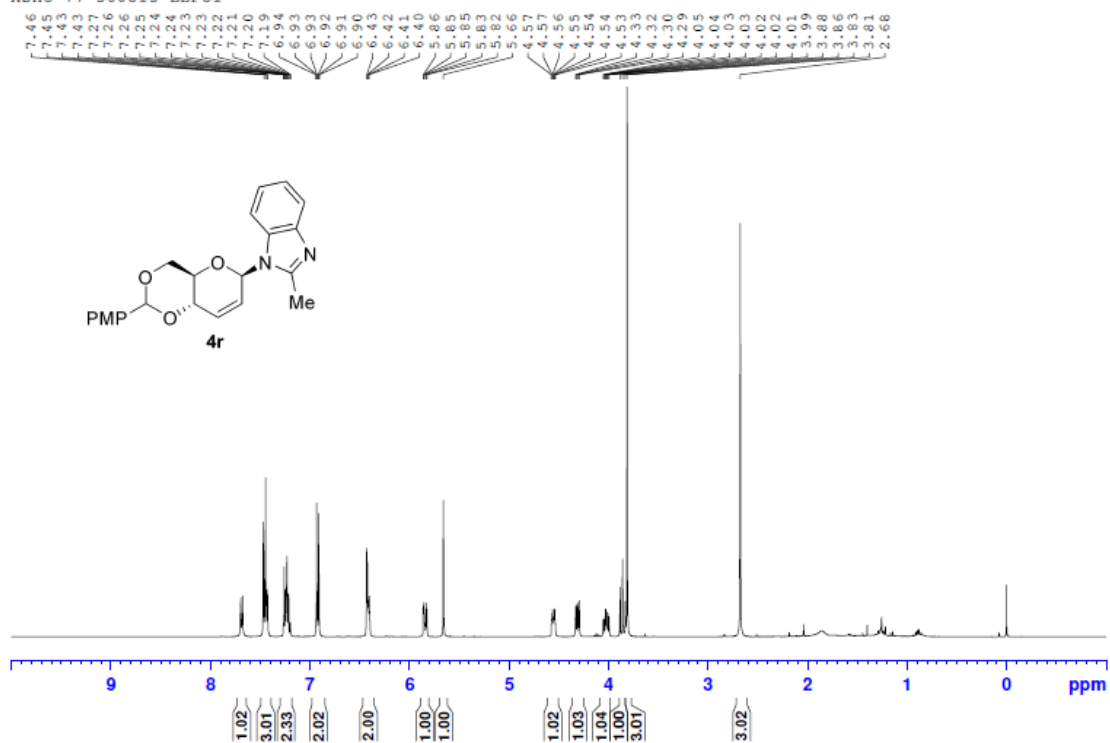

XSHC-77-C-300813-BBF01

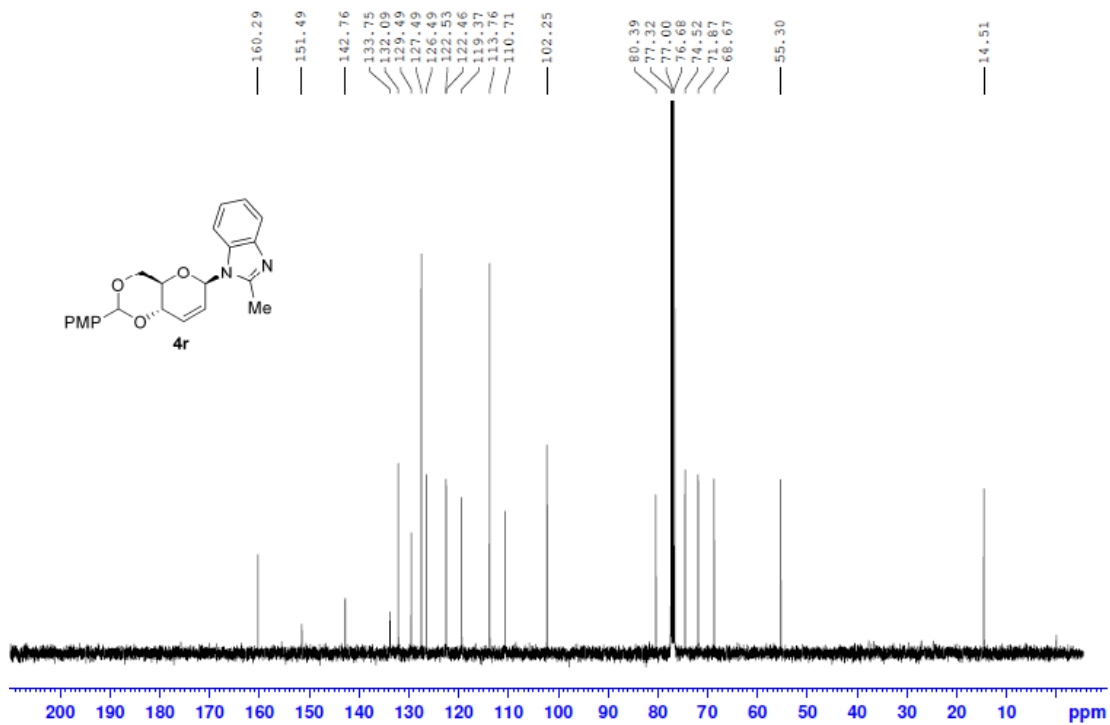



XSHD-39-purine-2, 400MHz, CDC13, 20131126

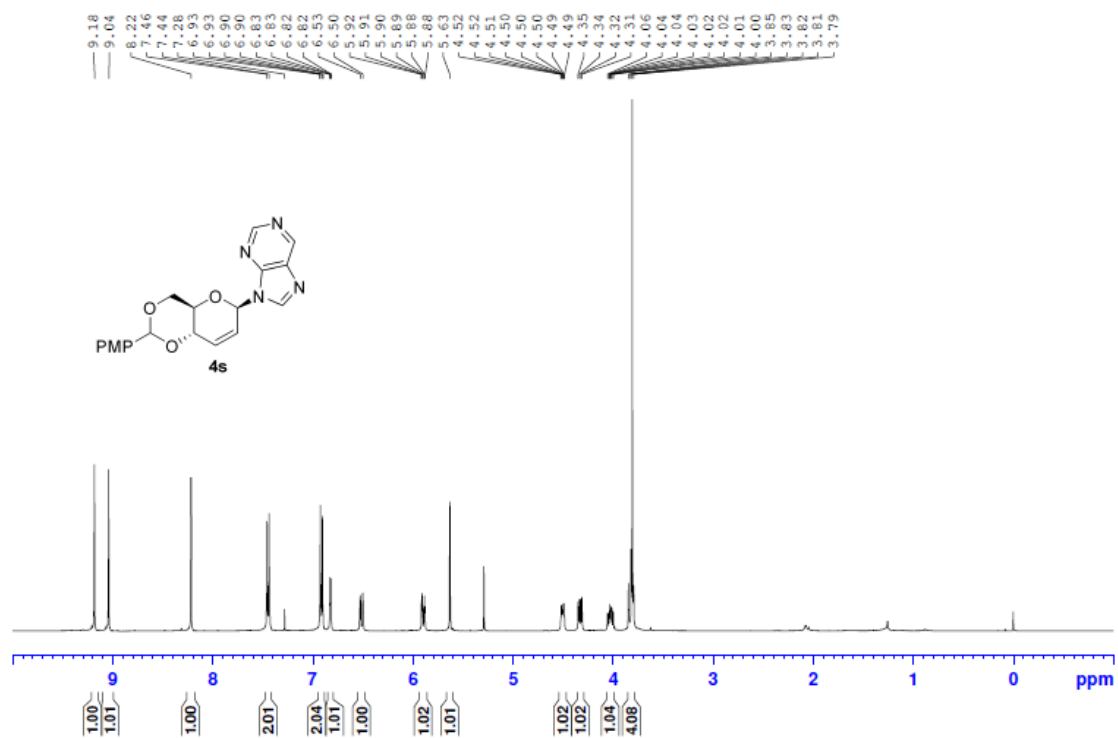

XSHD-39-purine-2-C, 400MHz, CDC13, 20131126

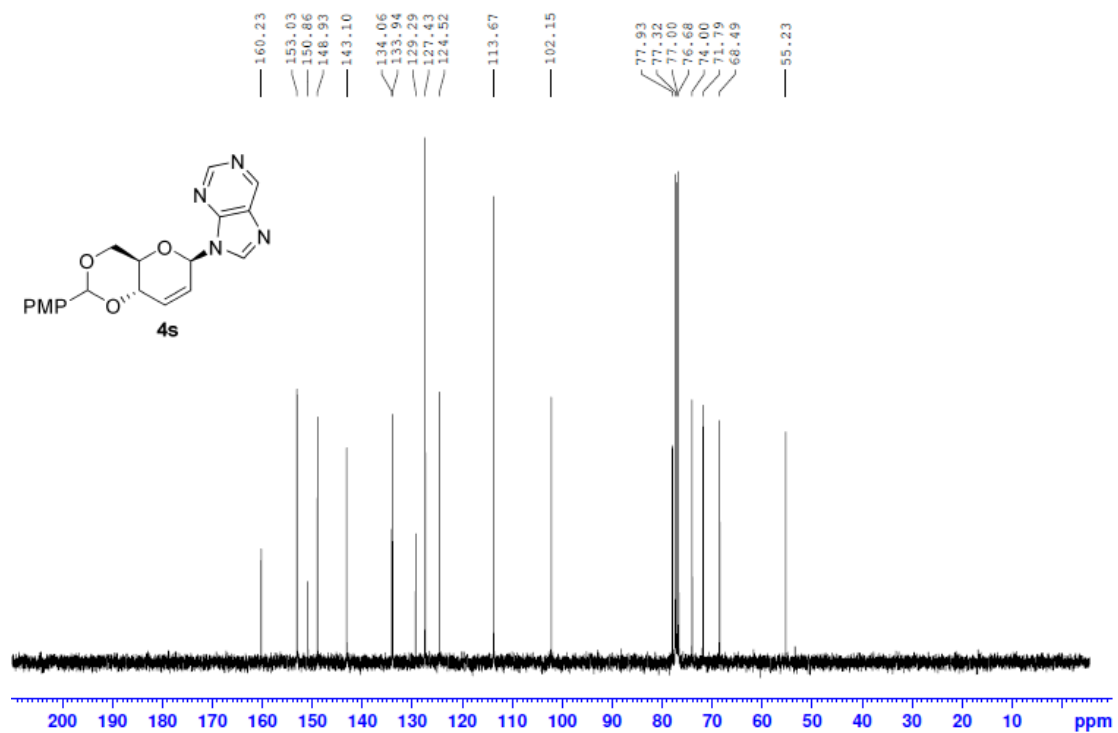

XSHD-39-purine-Cbz-5, bbfo1, CDCl3, 20131129

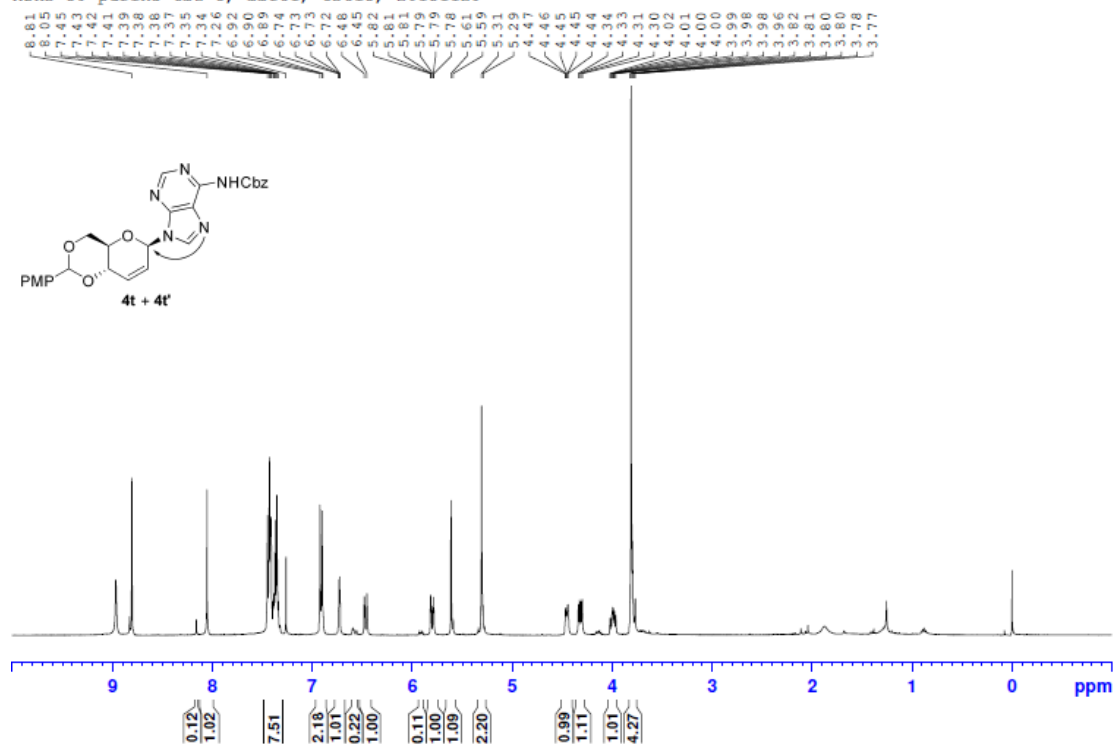

XSHD-39-purine-Cbz-5-C, bbfo1, CDCl3, 20131129

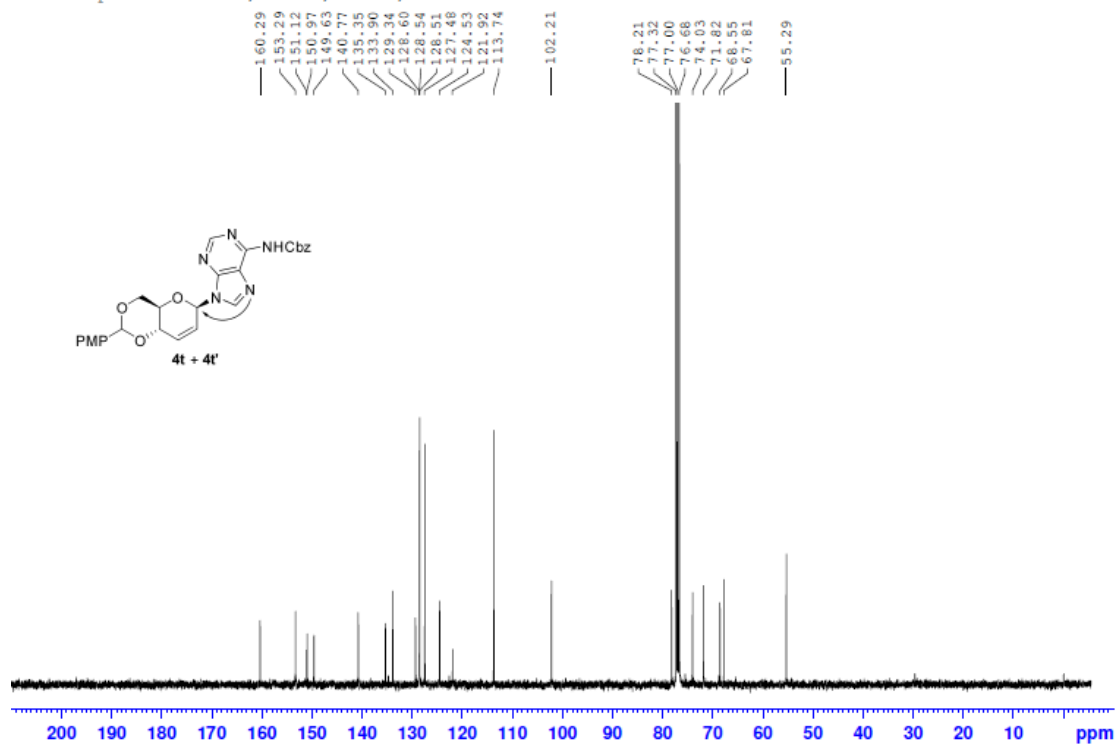

XSHB-53-3, BBFO1, 20130107

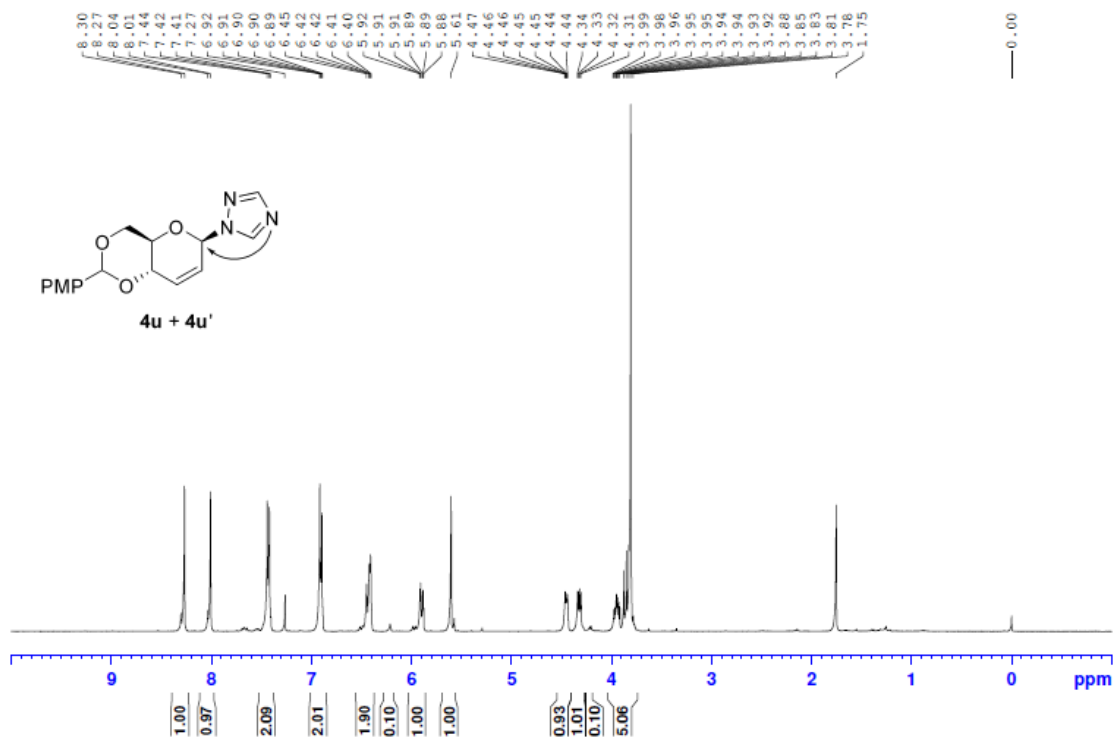

XSHB-53-4-C, BBFO1, 20130107

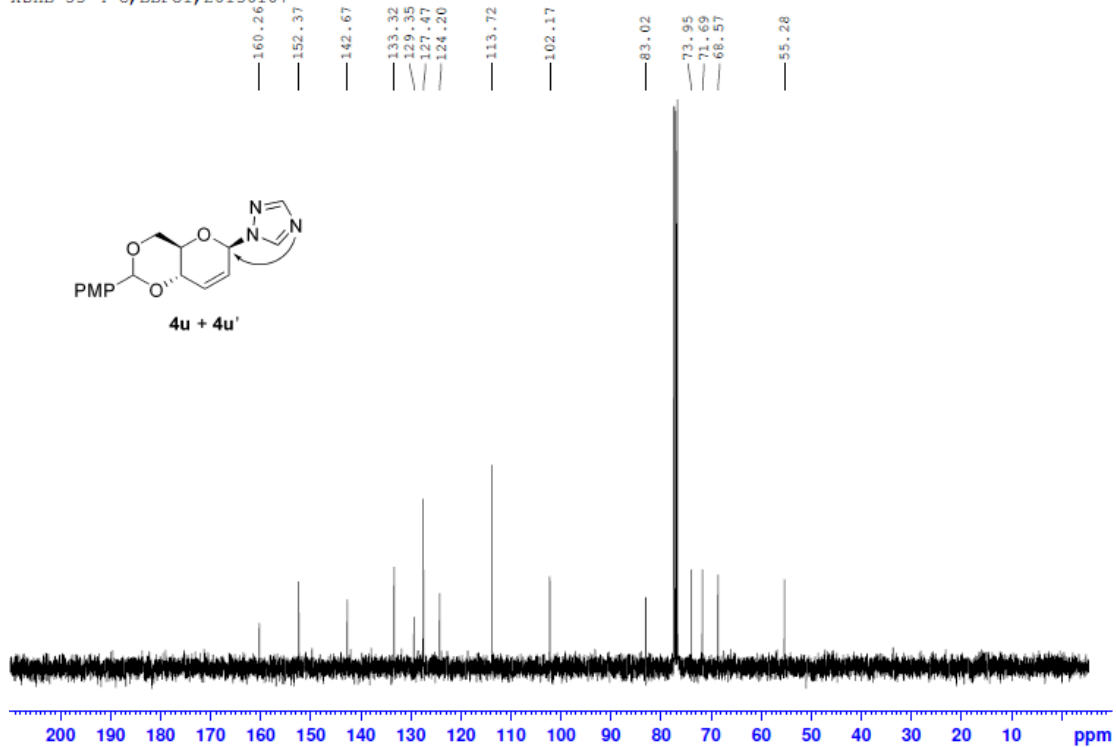

XSH-B-59(all product), BBF01

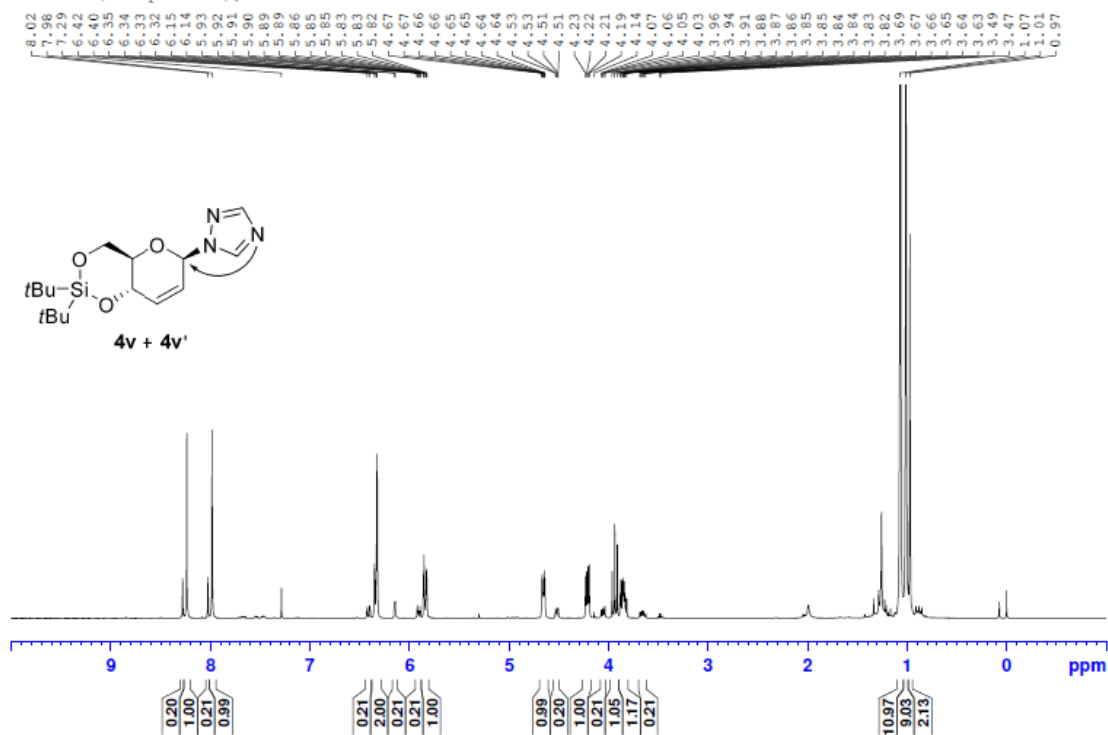

XSH-B-59(all product)-C, BBF01

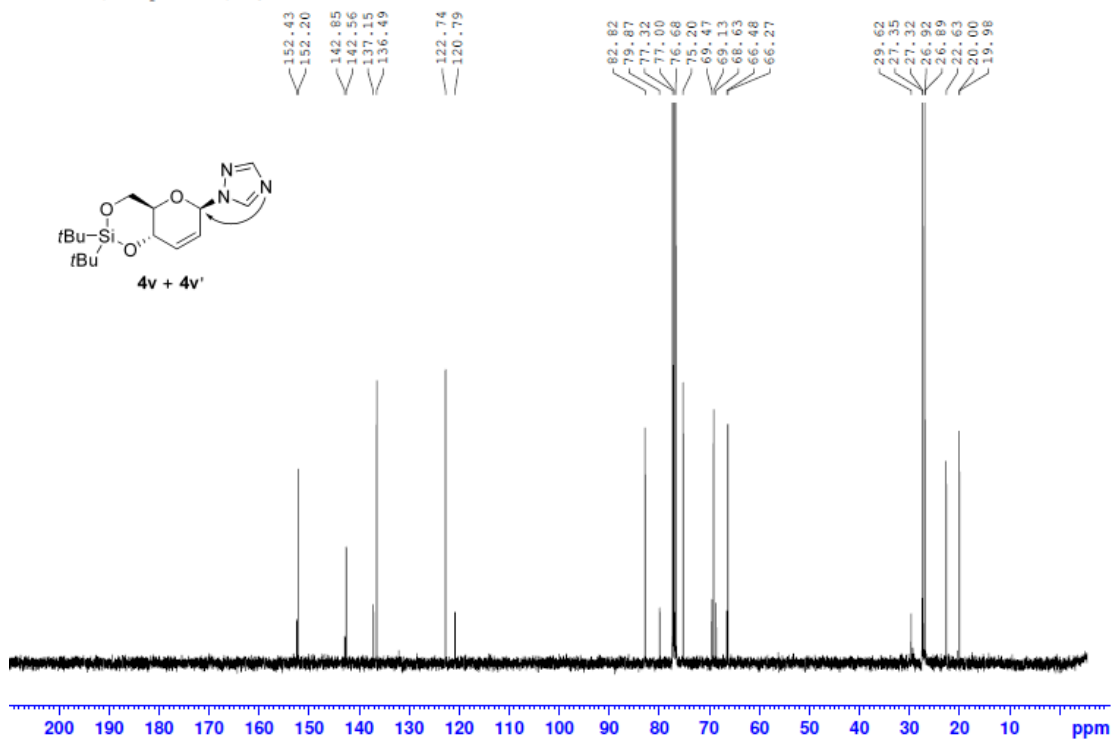

XSH-B-57, 1H, BBOF01, 400Hz, CDC13

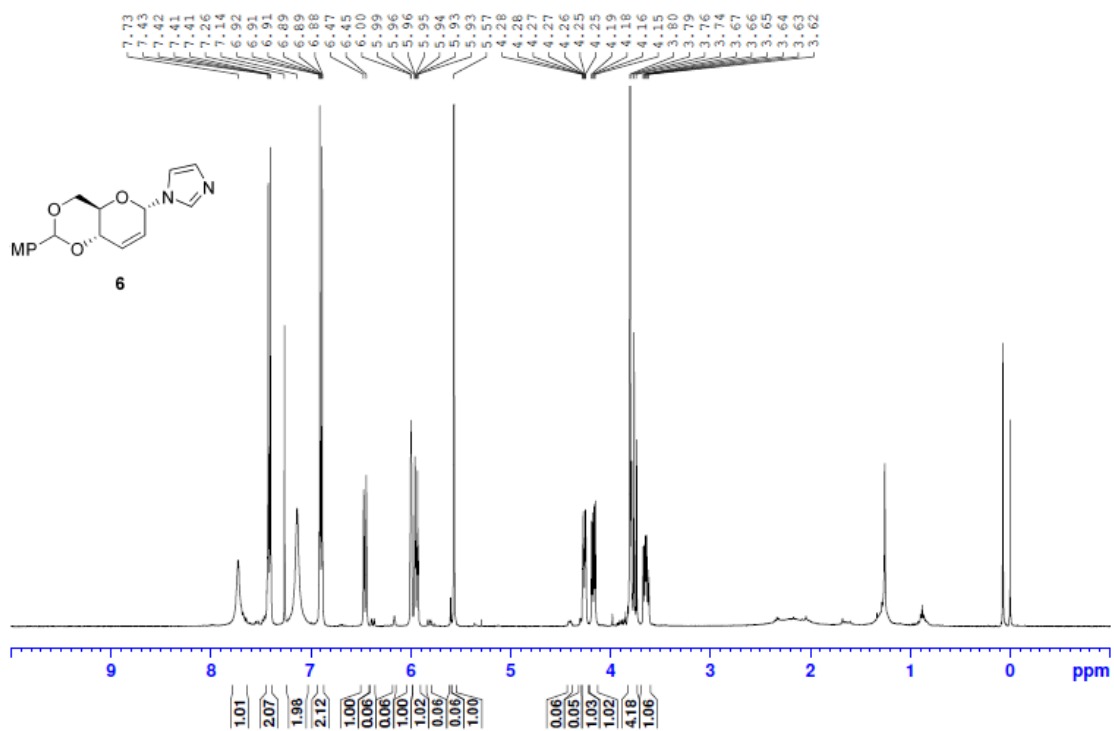

XSHB-53-2-C, 400MHz, BBFO1, 20130104

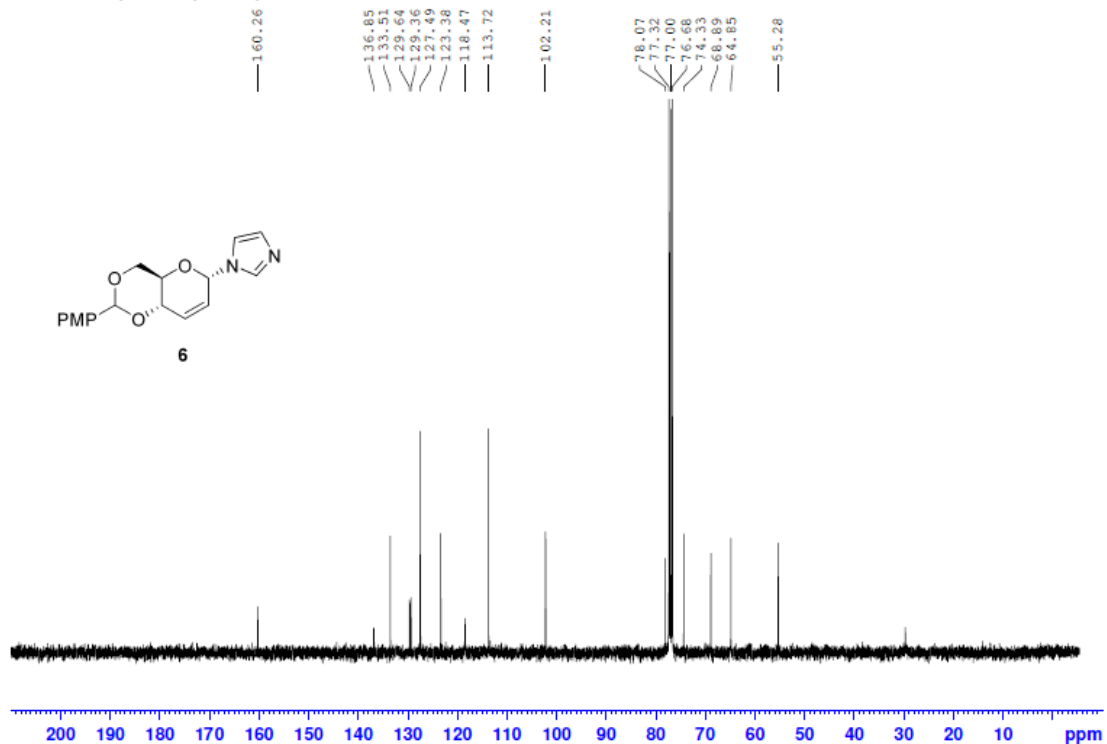

# Reaction progress of compound 1a as monitored by $^1\text{H}$ NMR

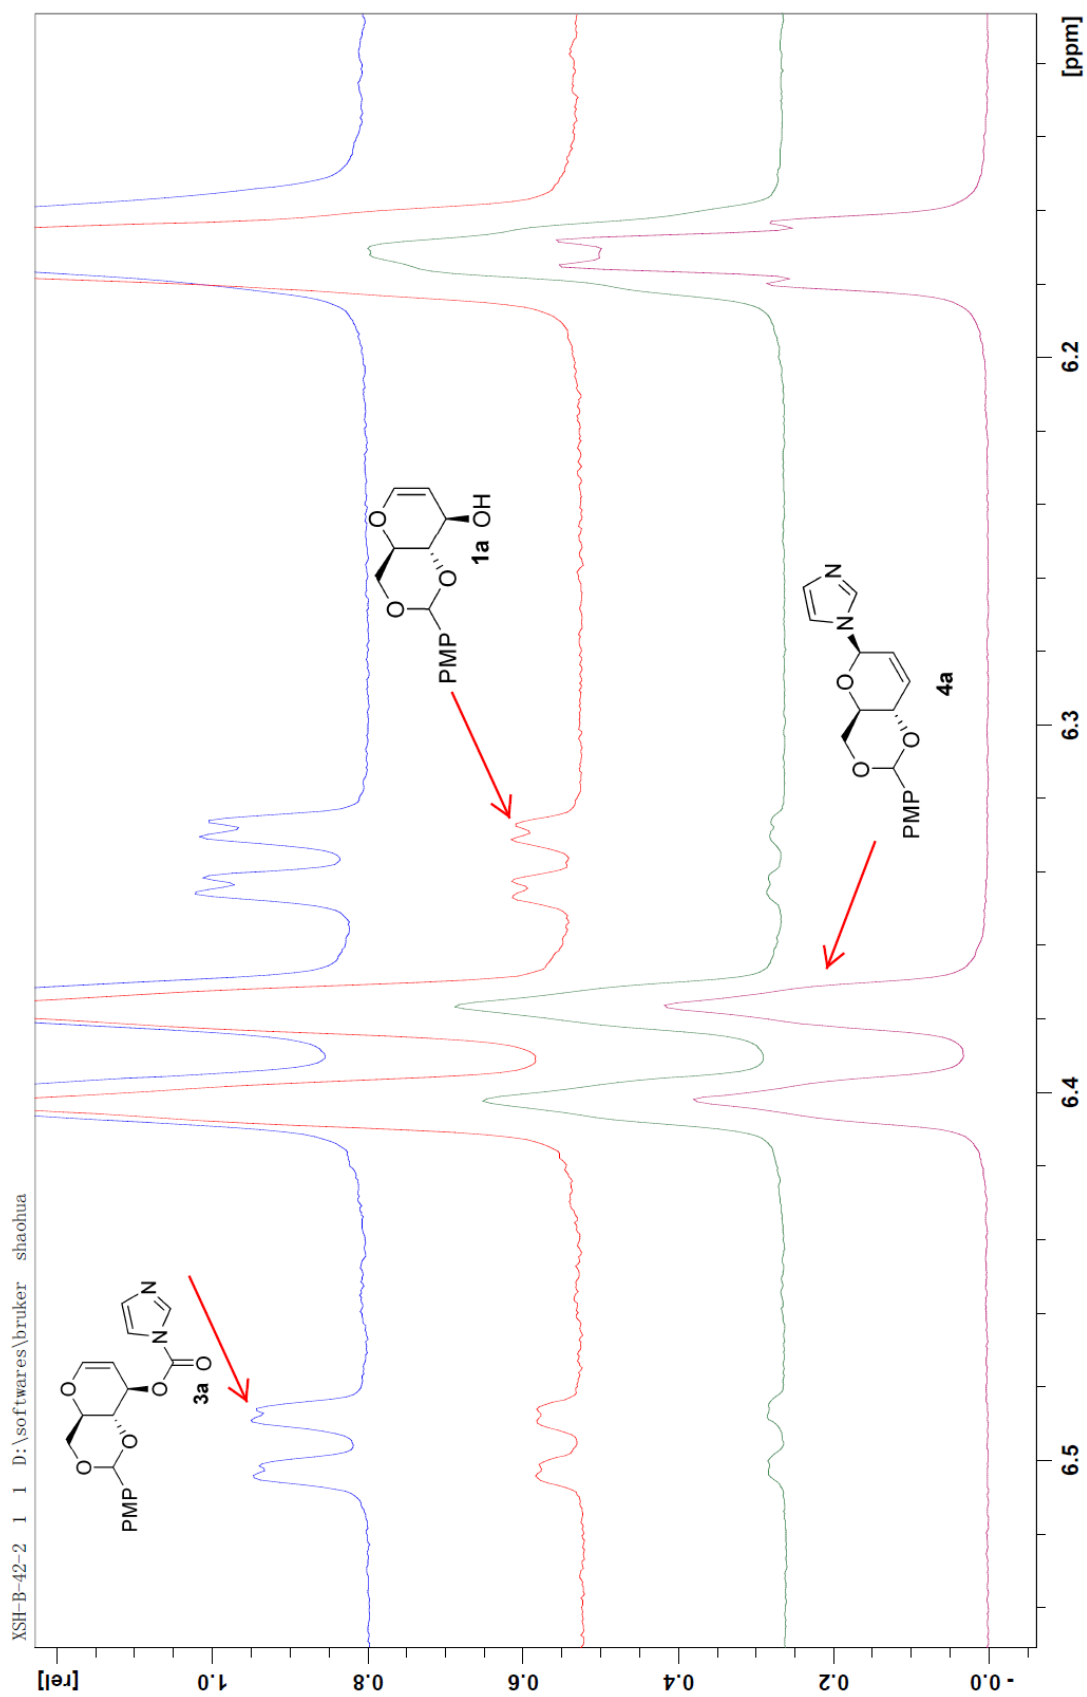

The X-ray structure of compound **4a** (CCDC number: 957218)

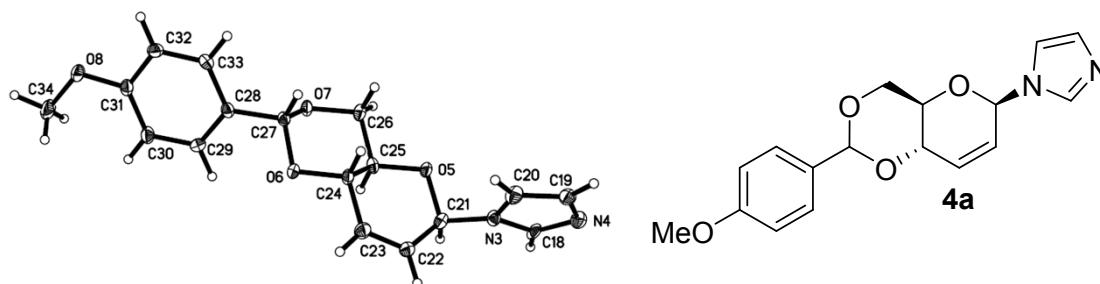

### Crystal data and structure refinement for compound **4a**

|                                   |                                                               |                 |
|-----------------------------------|---------------------------------------------------------------|-----------------|
| Empirical formula                 | C <sub>17</sub> H <sub>18</sub> N <sub>2</sub> O <sub>4</sub> |                 |
| Formula weight                    | 314.33                                                        |                 |
| Temperature                       | 103(2) K                                                      |                 |
| Wavelength                        | 0.71073 Å                                                     |                 |
| Crystal system                    | Triclinic                                                     |                 |
| Space group                       | P1                                                            |                 |
| Unit cell dimensions              | a = 7.1797(6) Å                                               | α = 103.804(3)° |
|                                   | b = 9.6308(10) Å                                              | β = 93.978(3)°  |
|                                   | c = 11.5304(12) Å                                             | γ = 95.999(5)°  |
| Volume                            | 766.34(13) Å <sup>3</sup>                                     |                 |
| Z                                 | 2                                                             |                 |
| Density (calculated)              | 1.362 Mg/m <sup>3</sup>                                       |                 |
| Absorption coefficient            | 0.098 mm <sup>-1</sup>                                        |                 |
| F(000)                            | 332                                                           |                 |
| Crystal size                      | 0.40 x 0.20 x 0.10 mm <sup>3</sup>                            |                 |
| Theta range for data collection   | 1.83 to 29.54°                                                |                 |
| Index ranges                      | -9 ≤ h ≤ 9, -13 ≤ k ≤ 13, -15 ≤ l ≤ 15                        |                 |
| Reflections collected             | 9961                                                          |                 |
| Independent reflections           | 4224 [R(int) = 0.0307]                                        |                 |
| Completeness to theta = 25.00°    | 99.8 %                                                        |                 |
| Absorption correction             | Semi-empirical from equivalents                               |                 |
| Max. and min. transmission        | 0.9903 and 0.9618                                             |                 |
| Refinement method                 | Full-matrix least-squares on F <sup>2</sup>                   |                 |
| Data / restraints / parameters    | 4224 / 3 / 417                                                |                 |
| Goodness-of-fit on F <sup>2</sup> | 1.060                                                         |                 |
| Final R indices [I > 2σ(I)]       | R1 = 0.0434, wR2 = 0.1017                                     |                 |
| R indices (all data)              | R1 = 0.0552, wR2 = 0.1221                                     |                 |
| Largest diff. peak and hole       | 0.308 and -0.377 e.Å <sup>-3</sup>                            |                 |

## The preparation of furanosyl glycol and the corresponding furanosyl *N*-glycoside

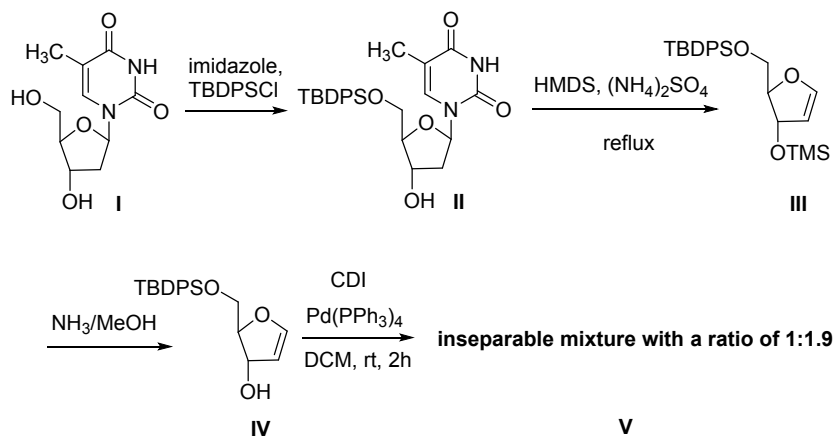

The glycol IV was prepared according to Pedersen's method (Synthesis, 1994, 1037 ; Monatshefte Fur Chemie, 2005, 136, 1641). The Spectra of compound IV and V are attached below.

### $^1\text{H}$ NMR of Compound IV:

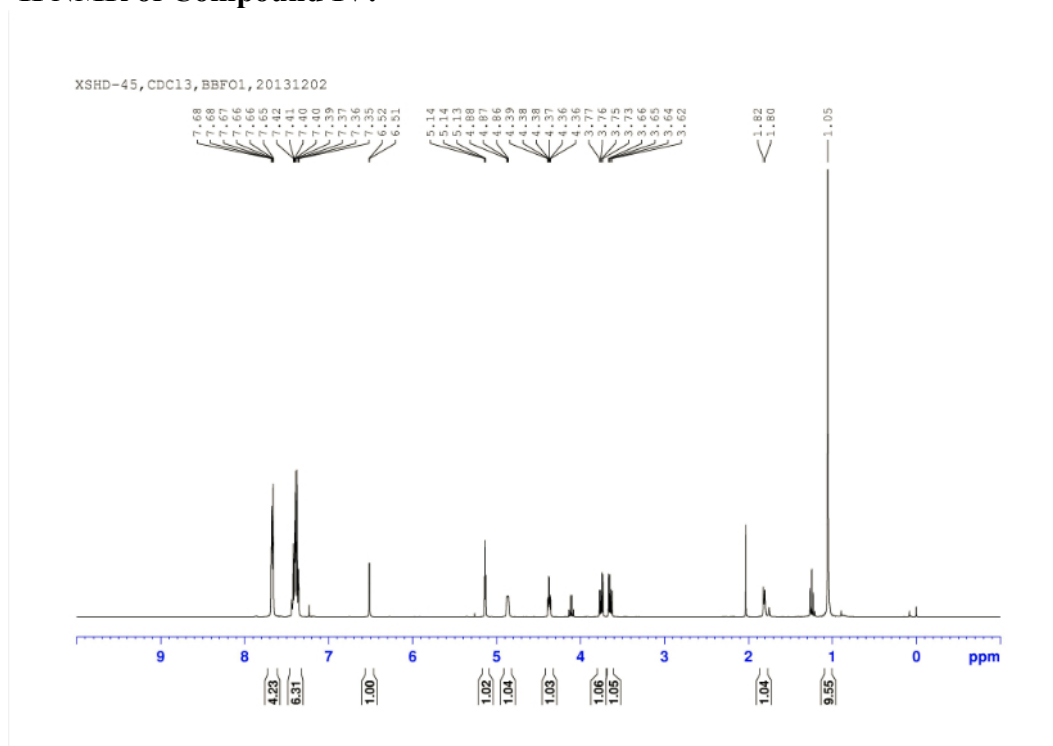



### <sup>13</sup>C NMR of Compound IV:

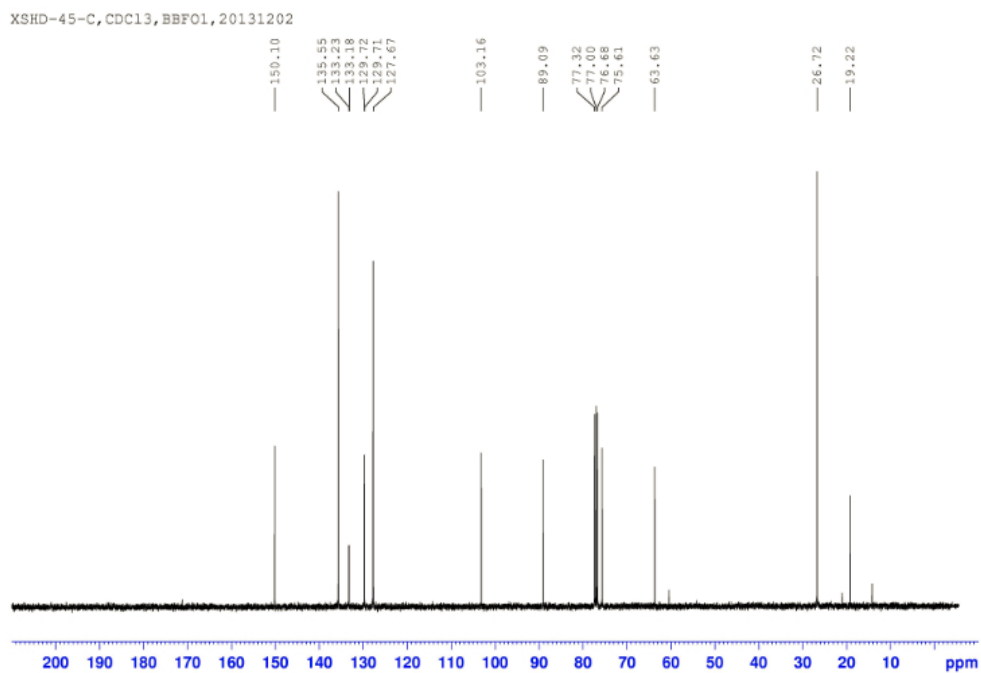

### <sup>1</sup>H NMR of Compound V:

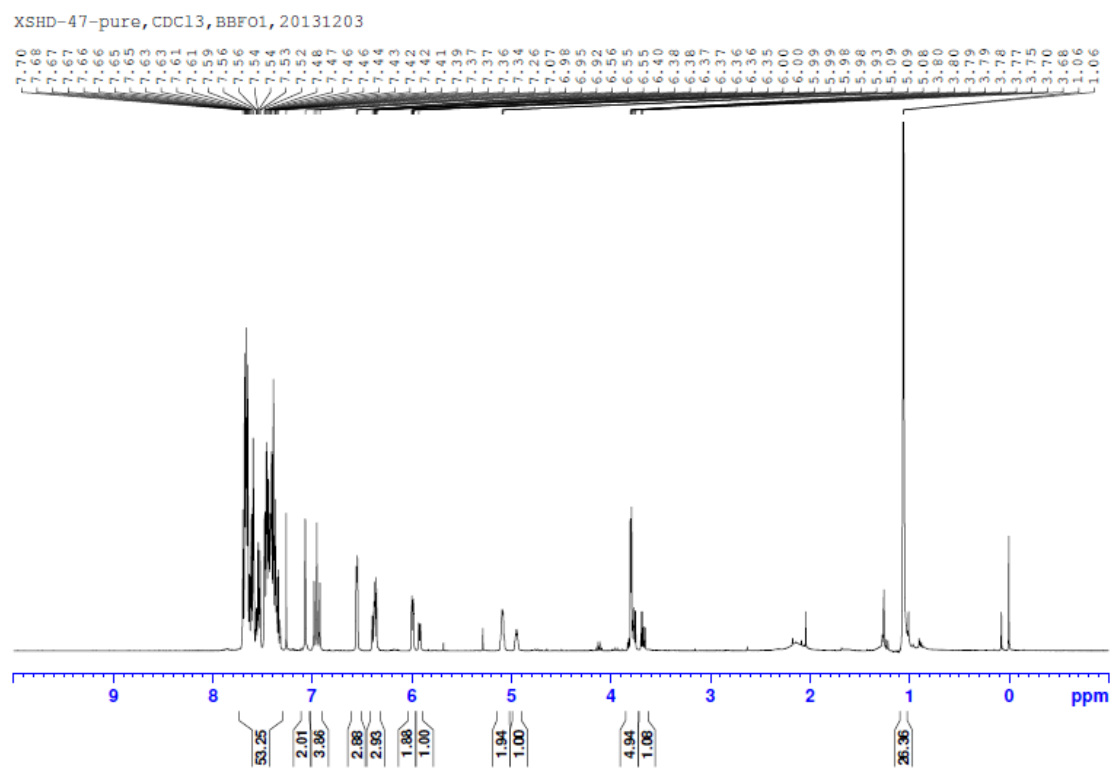

Supplement: c3cc48041k1.pdf [file c3cc48041k1.pdf]
